# Supplementary material for: Osteosarcoma tumors maintain intra-tumoral transcriptional heterogeneity during bone and lung colonization
Source: PubMed Central journal article supplement (PMC10142502; doi:10.1186/s12915-023-01593-3), 2023-04-27
Supplement: 12915_2023_1593_MOESM5_ESM.pdf [file 12915_2023_1593_MOESM5_ESM.pdf]

Figure S4

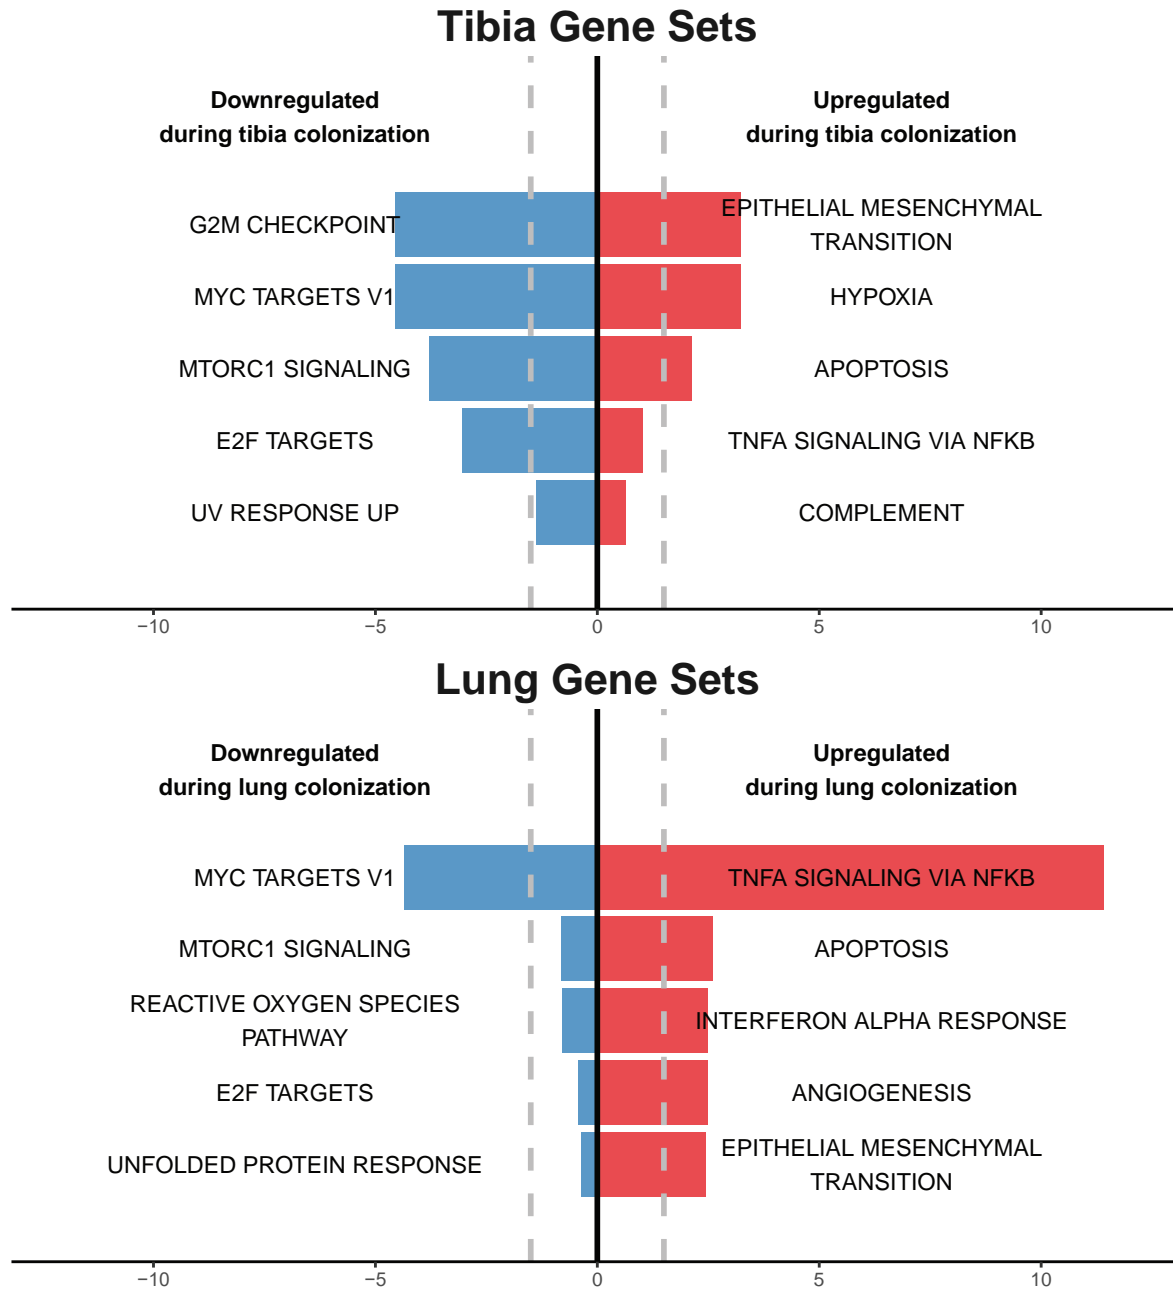

**Figure S4. Mouse osteosarcoma models share distinct transcriptional profiles with human osteosarcoma models during tibia and lung colonization.** K7M2 and F420 mouse models of osteosarcoma were added to the pathway enrichment analysis with the human models (OS-17, 143B, NCH-OS-2, NCH-OS-7) to determine conserved enriched pathways between mouse and human models. Pathway enrichment analysis with adjusted p values for hallmark gene sets associated with shared genes from the overlap of differentially expressed genes that are up- or down-regulated in tibia or lung lesions relative to corresponding starting population of cells (cell line or PDX flank tumors).
