# Supplementary material for: Osteosarcoma tumors maintain intra-tumoral transcriptional heterogeneity during bone and lung colonization
Source: PubMed Central journal article supplement (PMC10142502; doi:10.1186/s12915-023-01593-3), 2023-04-27
Supplement: 12915_2023_1593_MOESM8_ESM.pdf [file 12915_2023_1593_MOESM8_ESM.pdf]

Figure S7

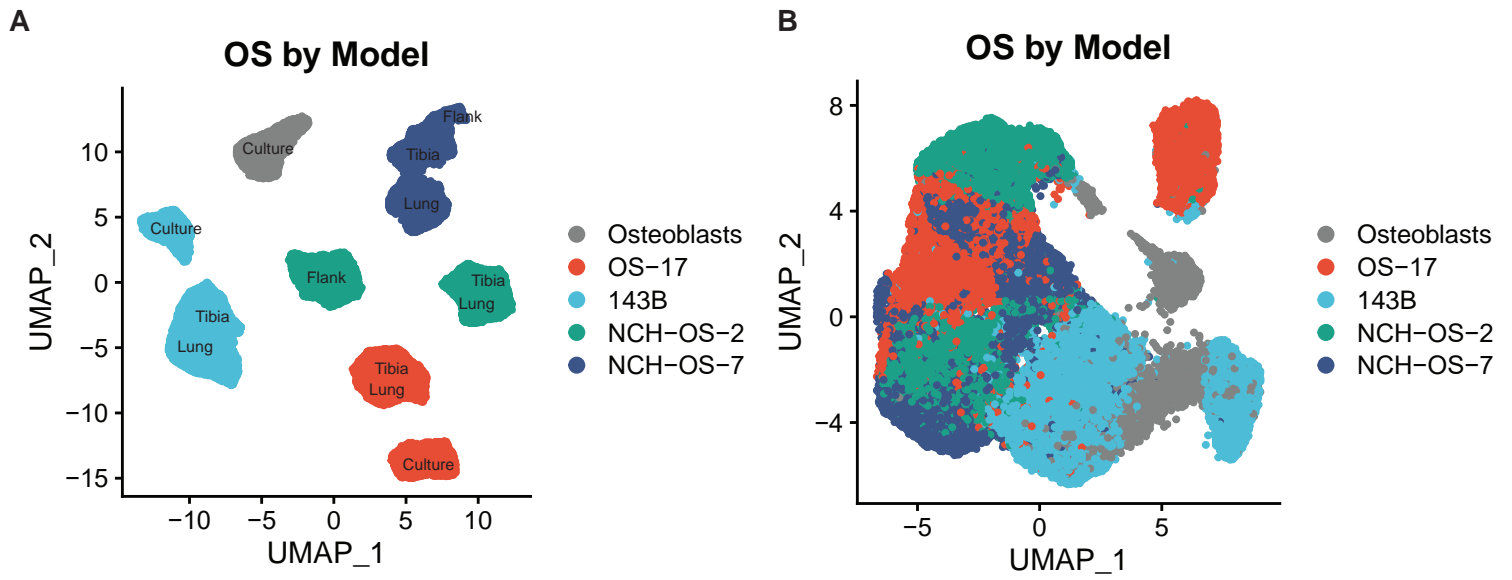

**Figure S7. High inter-tumor heterogeneity identified between models.** A) UMAP analysis of merged datasets. B) Application of Harmony forces similarity between heterogeneous populations of cells.
