# Supplementary material for: Osteosarcoma tumors maintain intra-tumoral transcriptional heterogeneity during bone and lung colonization
Source: PubMed Central journal article supplement (PMC10142502; doi:10.1186/s12915-023-01593-3), 2023-04-27
Supplement: 12915_2023_1593_MOESM9_ESM.pdf [file 12915_2023_1593_MOESM9_ESM.pdf]

Figure S8

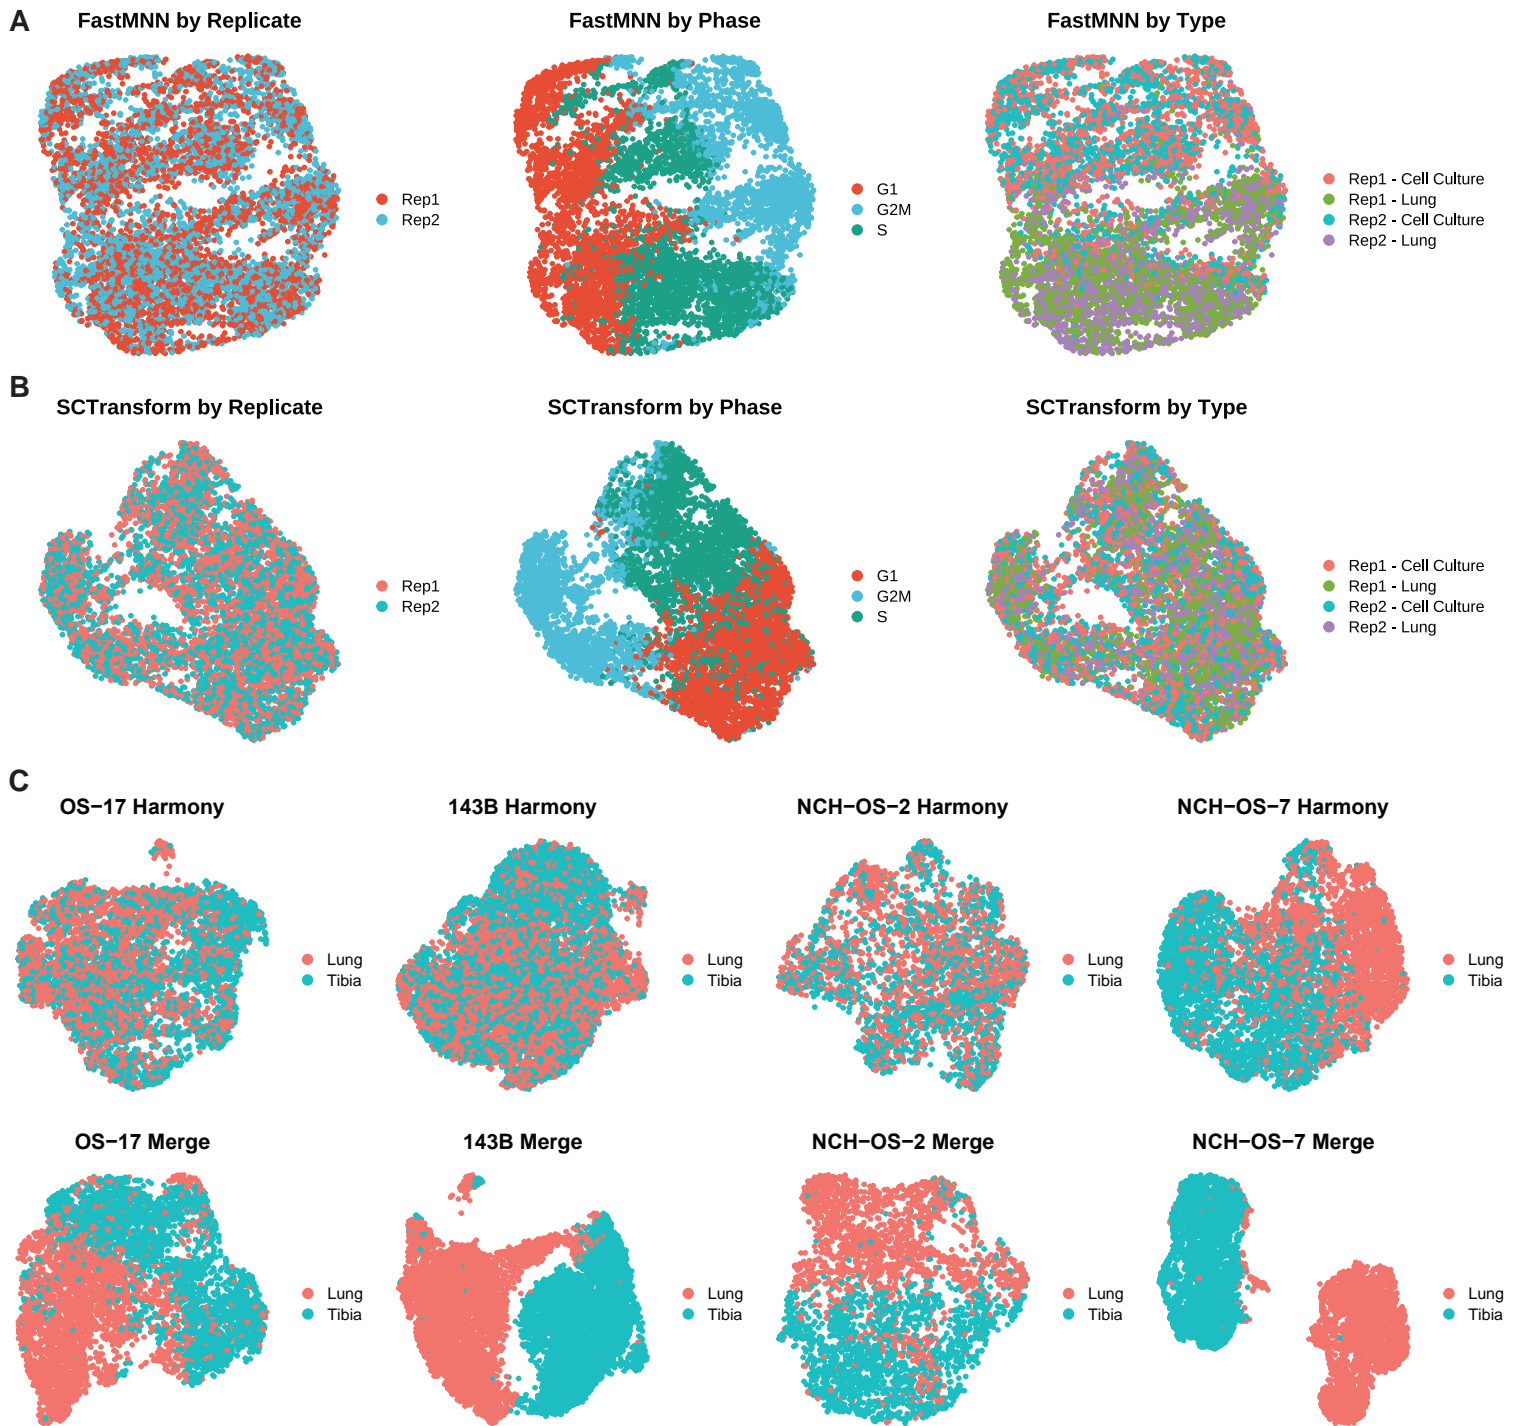

**Figure S8. Integrative analysis for within-model comparison of primary and metastatic lesions.** A, B) Application of FastMNN or SCTransform between replicate samples demonstrated complete overlay, however cells separated largely by state of cell cycle (OS-17). C) Application of Harmony or merging to Seurat objects. Application of Harmony demonstrated nearly complete overlay. Merged objects displayed some overlay while maintaining a slight distinction between samples. Cells did not cluster based on state of cell cycle (data not shown).
