# Supplementary material for: Osteosarcoma tumors maintain intra-tumoral transcriptional heterogeneity during bone and lung colonization
Source: PubMed Central journal article supplement (PMC10142502; doi:10.1186/s12915-023-01593-3), 2023-04-27
Supplement: 12915_2023_1593_MOESM10_ESM.pdf [file 12915_2023_1593_MOESM10_ESM.pdf]

Figure S9

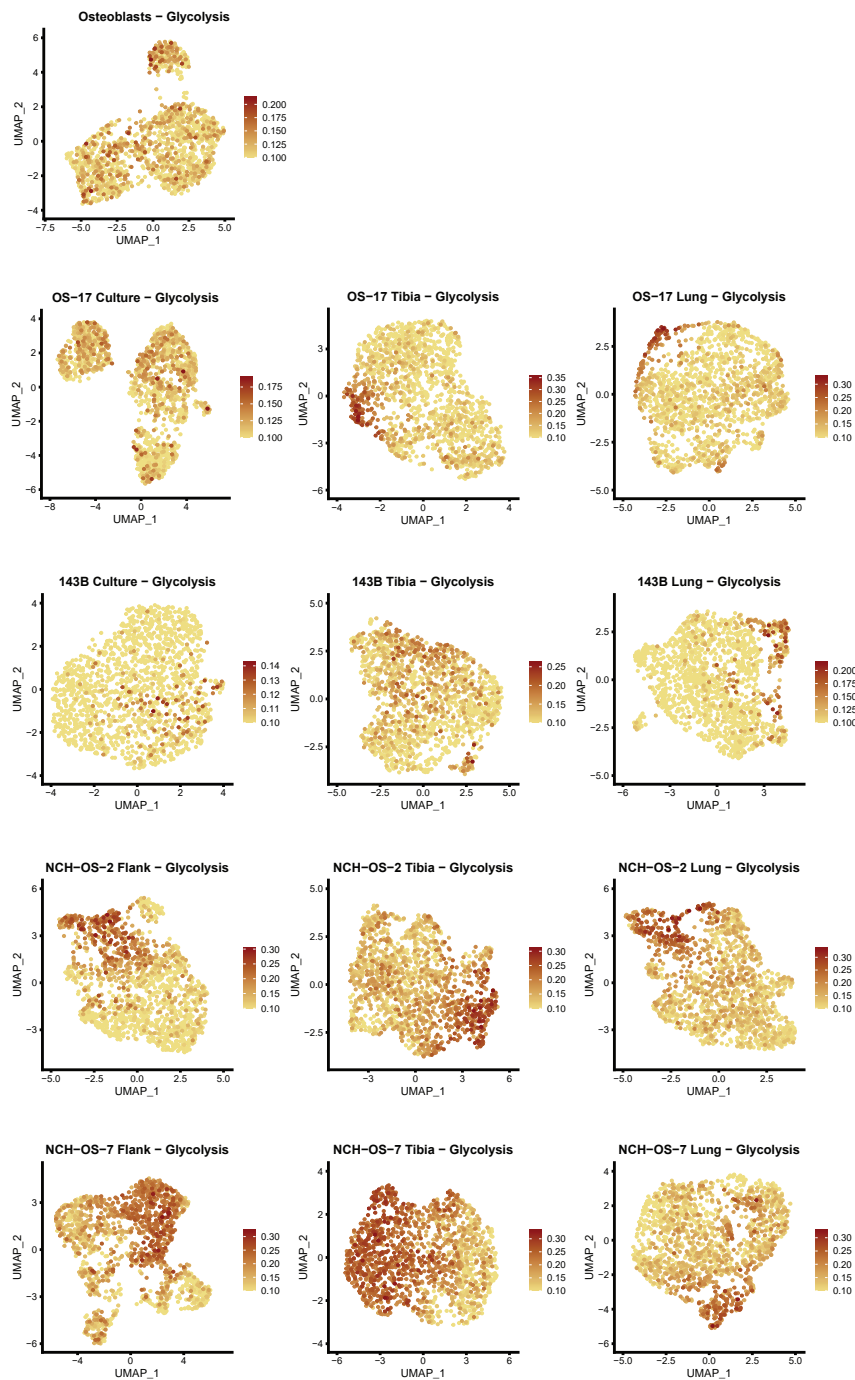

**Figure S9. Heterogeneous activation of glycolysis identified across multiple cell line and PDX tumor datasets.** FeaturePlots for glycolysis module score in each of the datasets. Module score for glycolysis was calculated using the 'AddModuleScore' function in Seurat with msigdb HALLMARK\_GLYCOLYSIS genes as input features for the expression program.

Figure S10

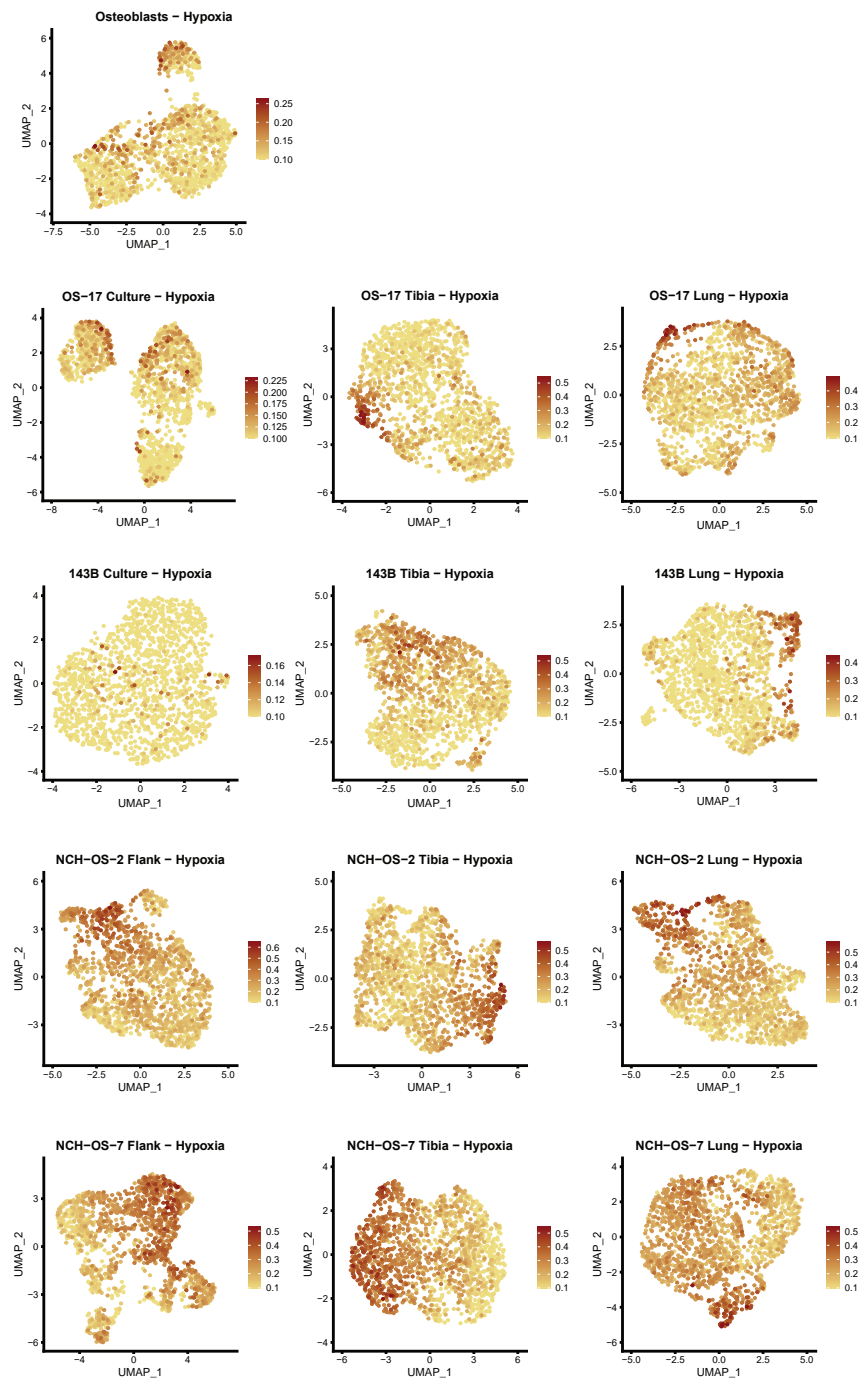

**Figure S10. Heterogeneous activation of hypoxia related genes identified across multiple cell line and PDX tumor datasets.** FeaturePlots for hypoxia module score in each of the datasets. Module score for hypoxia was calculated using the 'AddModuleScore' function in Seurat with msigdb HALLMARK\_HYPOXIA genes as input features for the expression program.

Figure S11

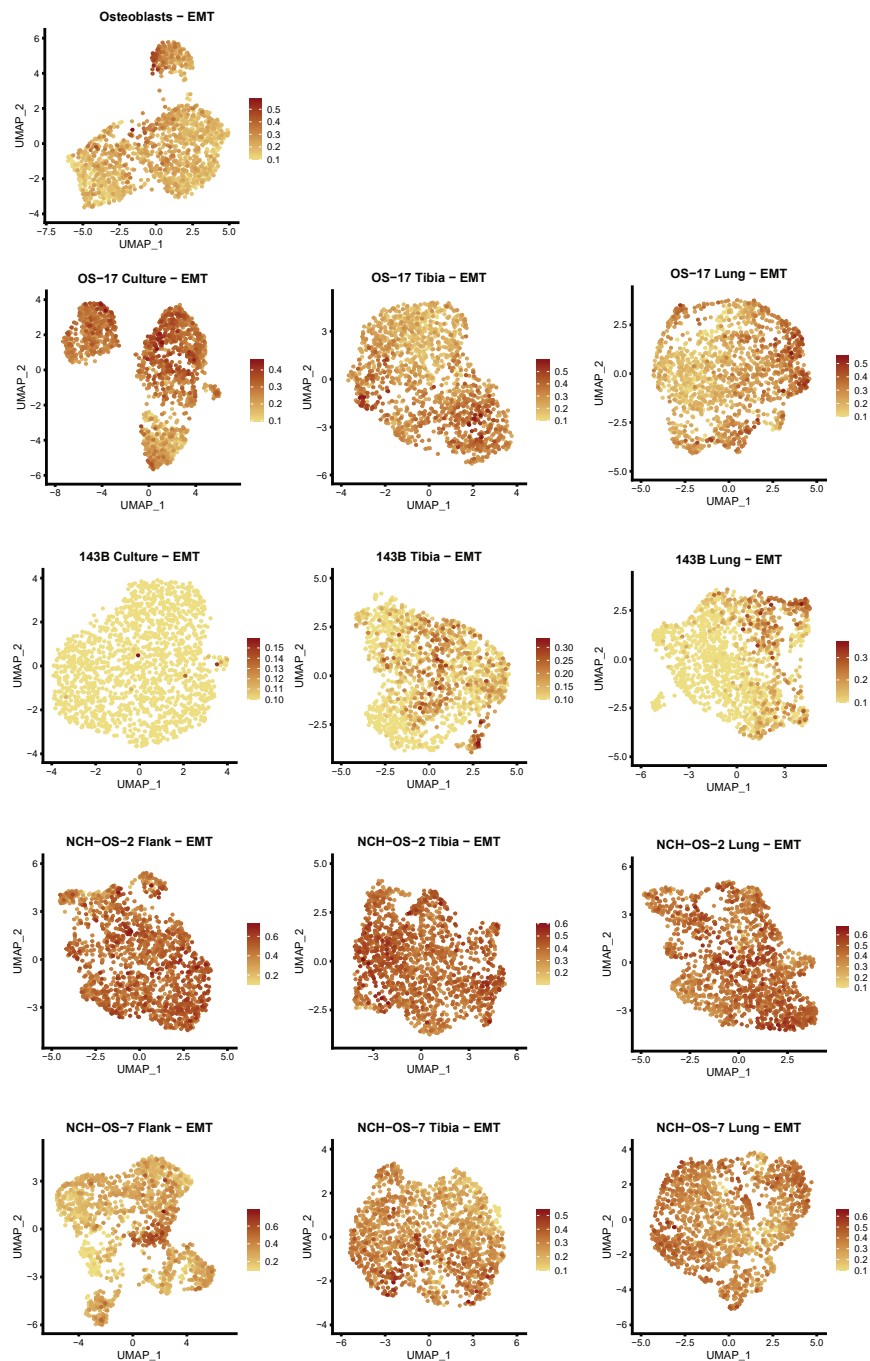

**Figure S11. Heterogeneous activation of EMT identified across multiple cell line and PDX tumor datasets.** FeaturePlots for EMT module score in each of the datasets. Module score for EMT was calculated using the 'AddModuleScore' function in Seurat with msigdb HALLMARK\_EMT genes as input features for the expression program.

Figure S12

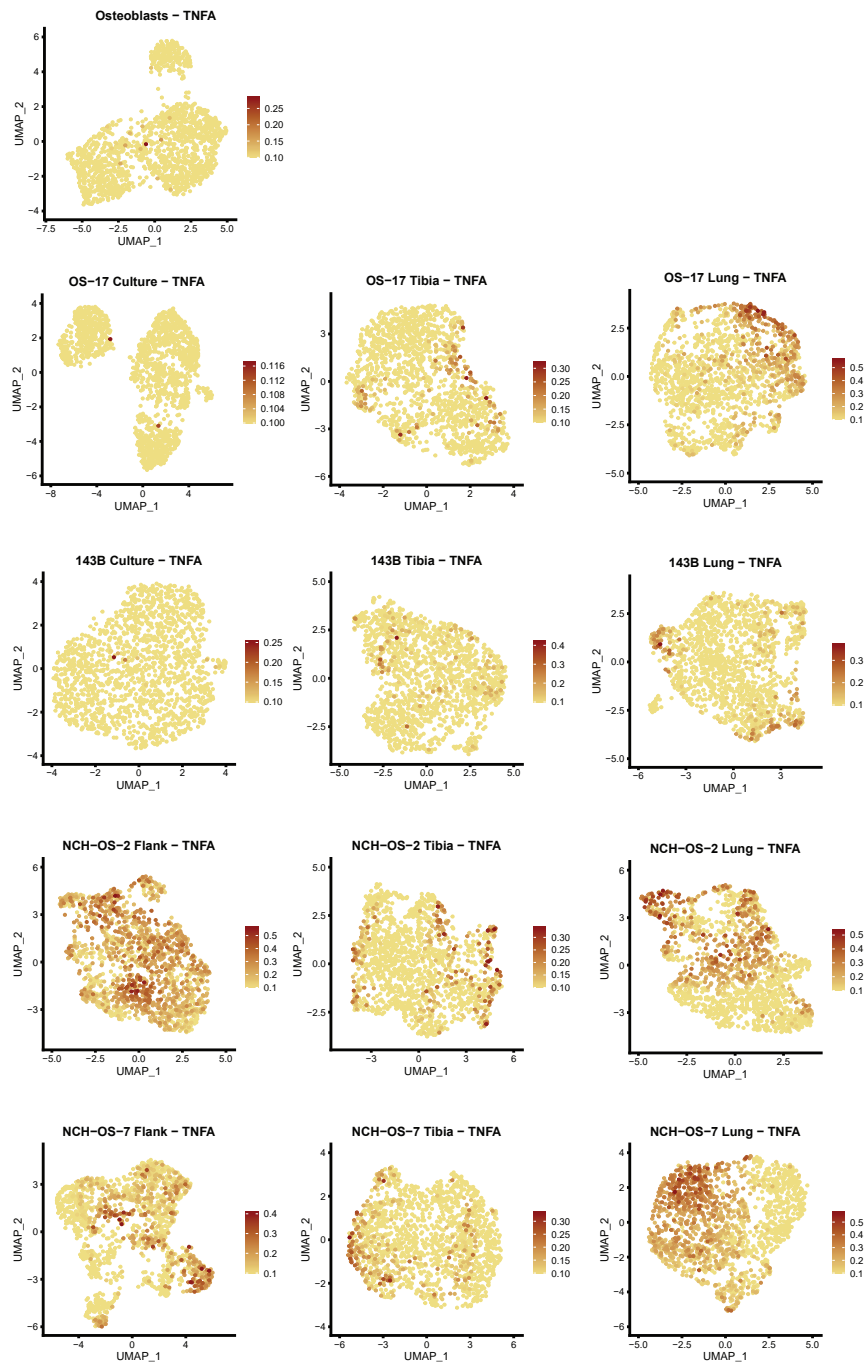

**Figure S12. Heterogeneous activation of ‘TNF $\alpha$  signaling via NF $\kappa$ B’ identified across multiple cell line and PDX tumor datasets.** FeaturePlots for TNF $\alpha$  signaling via NF $\kappa$ B module score in each of the datasets. Module score for EMT was calculated using the ‘AddModuleScore’ function in Seurat with msigdb HALL-MARK\_TNFA genes as input features for the expression program.
