# Supplementary material for: Osteosarcoma tumors maintain intra-tumoral transcriptional heterogeneity during bone and lung colonization
Source: PubMed Central journal article supplement (PMC10142502; doi:10.1186/s12915-023-01593-3), 2023-04-27
Supplement: 12915_2023_1593_MOESM11_ESM.pdf [file 12915_2023_1593_MOESM11_ESM.pdf]

Figure S13

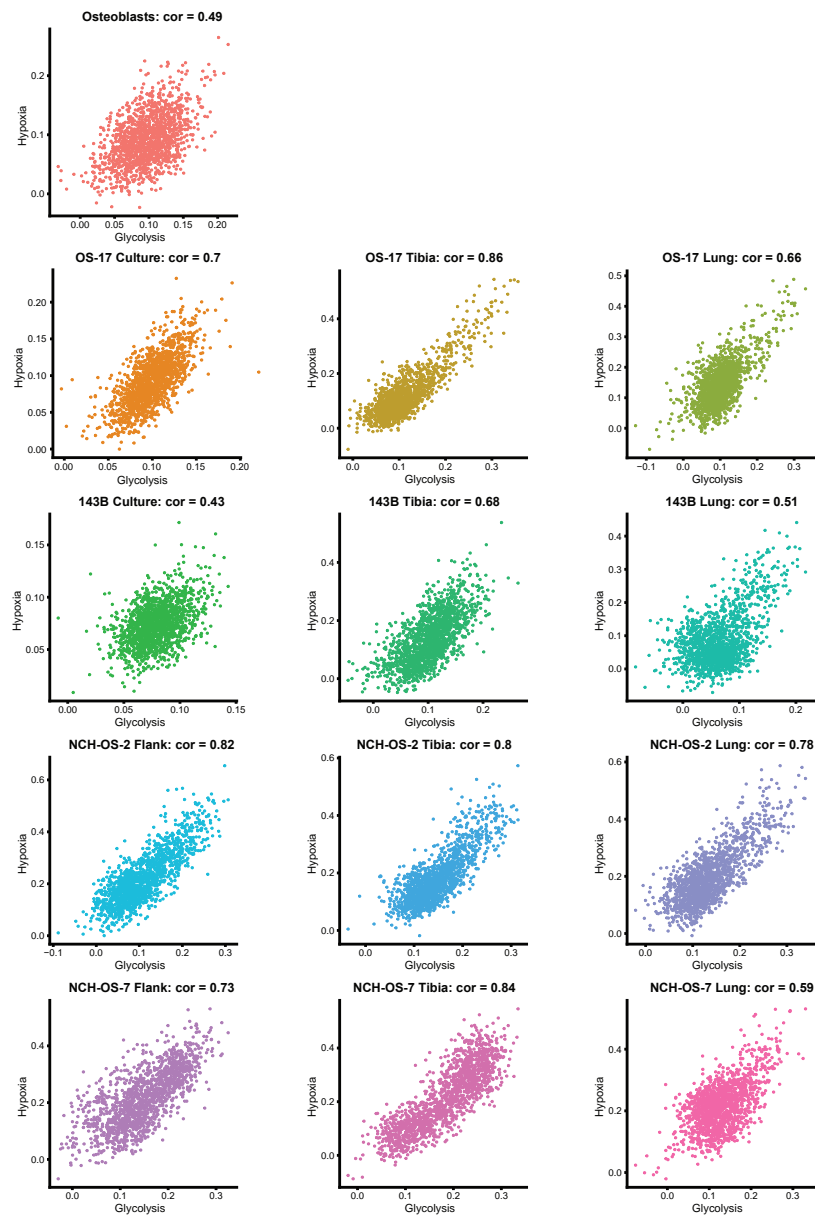

**Figure S13. Correlation analysis for multiple cell line and PDX tumor datasets reveals strong positive correlation between glycolysis and hypoxia module scores.** Scatter plots using the 'FeatureScatter' function in Seurat for glycolysis and hypoxia module scores in each of the datasets. Seurat-calculated correlation coefficient for each analysis is shown in the title above each plot.

Figure S14

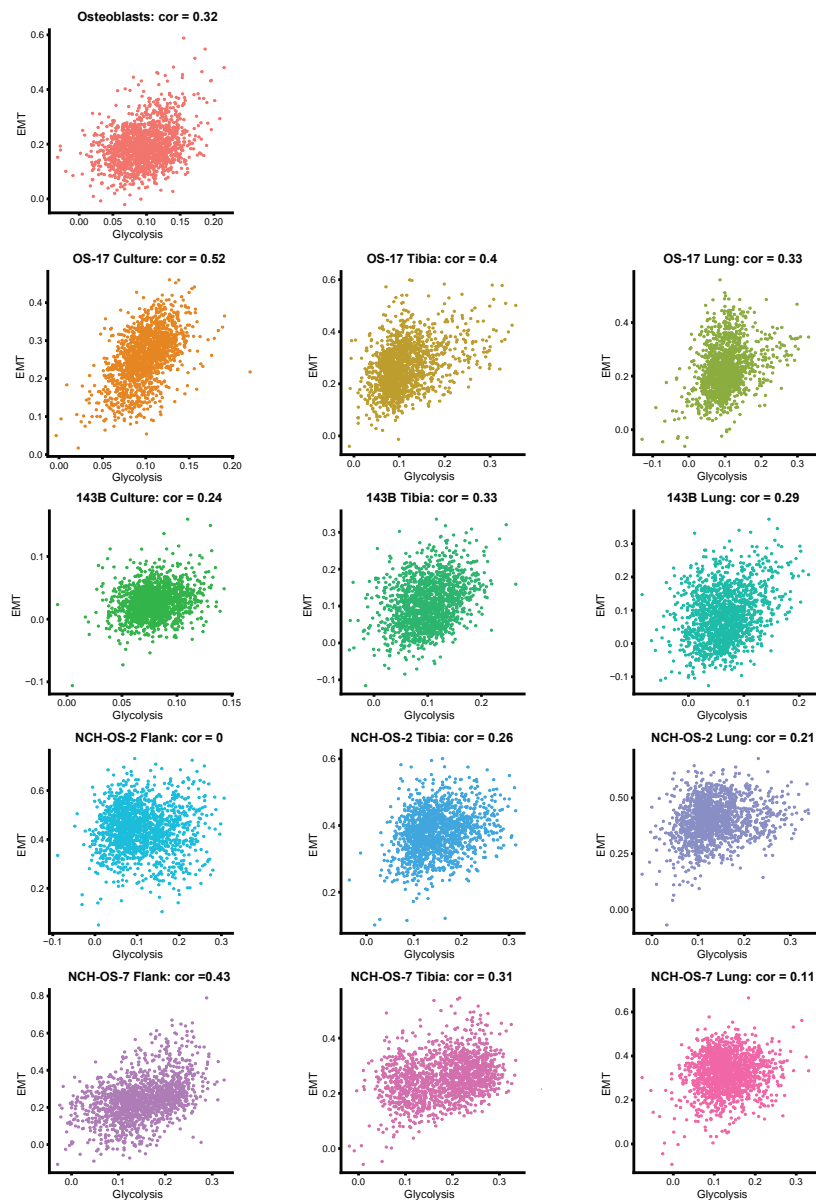

**Figure S14. Correlation analysis for multiple cell line and PDX tumor datasets reveals minimal correlation between glycolysis and EMT module scores.** Scatter plots using the 'FeatureScatter' function in Seurat for glycolysis and EMT module scores in each of the datasets. Seurat-calculated correlation coefficient for each analysis is shown in the title above each plot.

Figure S15

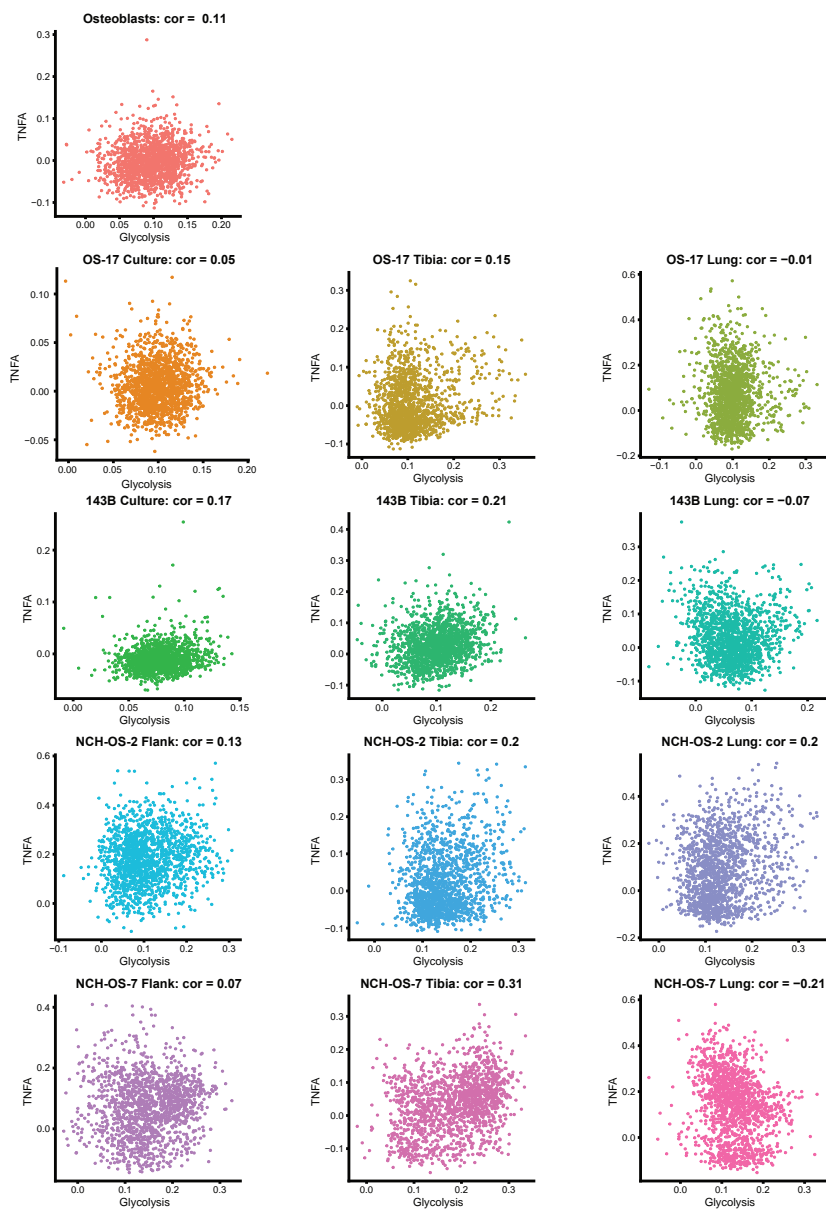

**Figure S15. Correlation analysis for multiple cell line and PDX tumor datasets reveals minimal correlation between glycolysis and 'TNF $\alpha$  signaling via NF $\kappa$ B' module scores.** Scatter plots using the 'FeatureScatter' function in Seurat for glycolysis and TNF $\alpha$  signaling via NF $\kappa$ B module scores in each of the datasets. Seurat-calculated correlation coefficient for each analysis is shown in the title above each plot.

Figure S16

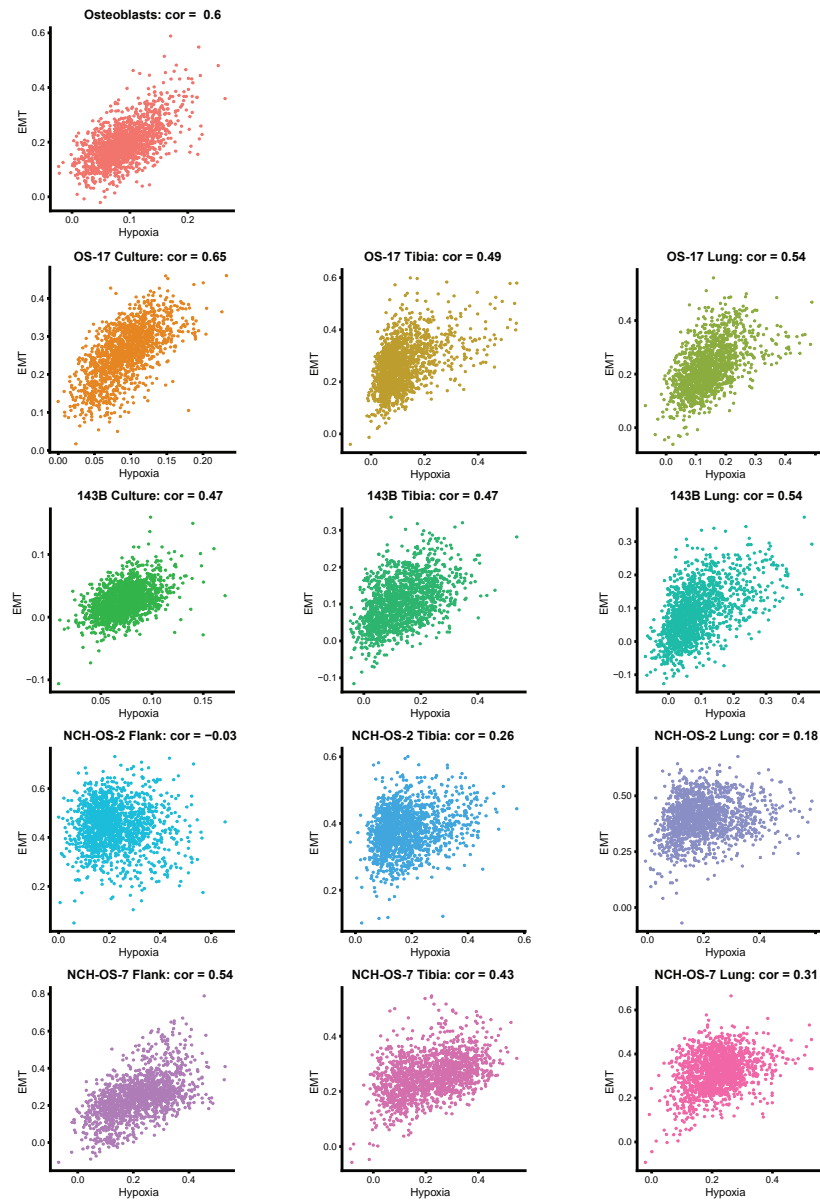

**Figure S16. Correlation analysis for multiple cell line and PDX tumor datasets reveals mixed correlation between hypoxia and EMT module scores.** Scatter plots using the 'FeatureScatter' function in Seurat for hypoxia and EMT module scores in each of the datasets. Seurat-calculated correlation coefficient for each analysis is shown in the title above each plot.

Figure S17

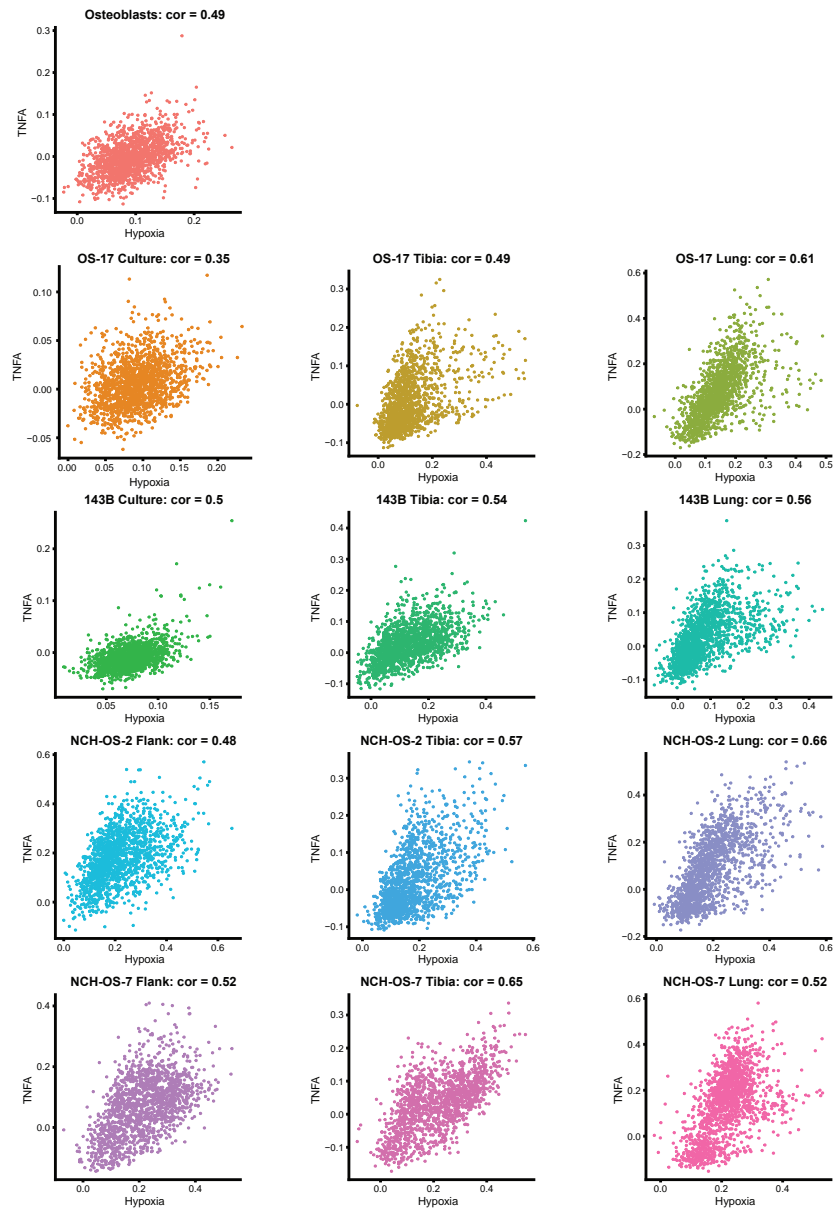

**Figure S17. Correlation analysis for multiple cell line and PDX tumor datasets reveals strong correlation between hypoxia and 'TNF $\alpha$  signaling via NF $\kappa$ B' module scores.** Scatter plots using the 'FeatureScatter' function in Seurat for hypoxia and TNF $\alpha$  signaling via NF $\kappa$ B module scores in each of the datasets. Seurat-calculated correlation coefficient for each analysis is shown in the title above each plot.

Figure S18

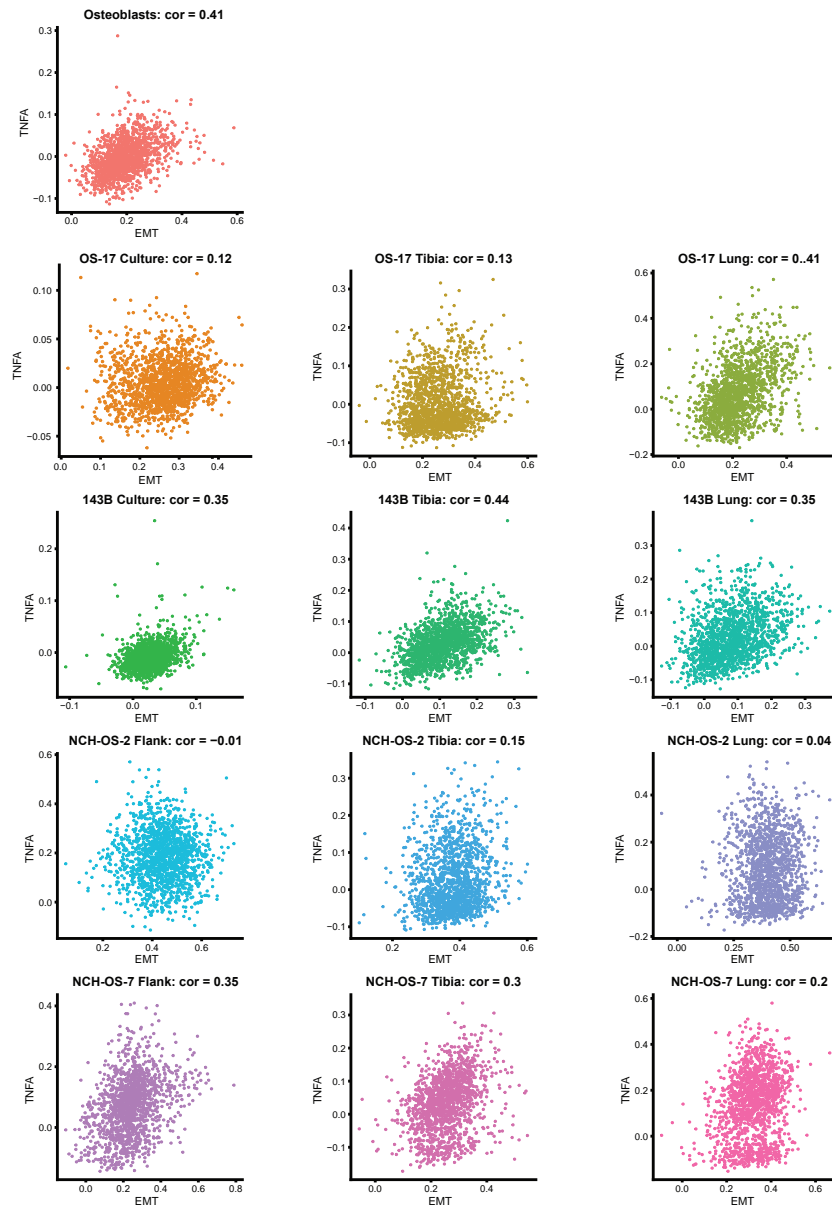

**Figure S18. Correlation analysis for multiple cell line and PDX tumor datasets reveals moderate correlation between EMT and 'TNF $\alpha$  signaling via NF $\kappa$ B' module scores.** Scatter plots using the 'FeatureScatter' function in Seurat for EMT and TNF $\alpha$  signaling via NF $\kappa$ B module scores in each of the datasets. Seurat-calculated correlation coefficient for each analysis is shown in the title above each plot.
