# Supplementary material for: Osteosarcoma tumors maintain intra-tumoral transcriptional heterogeneity during bone and lung colonization
Source: PubMed Central journal article supplement (PMC10142502; doi:10.1186/s12915-023-01593-3), 2023-04-27
Supplement: 12915_2023_1593_MOESM12_ESM.pdf [file 12915_2023_1593_MOESM12_ESM.pdf]

Figure S19

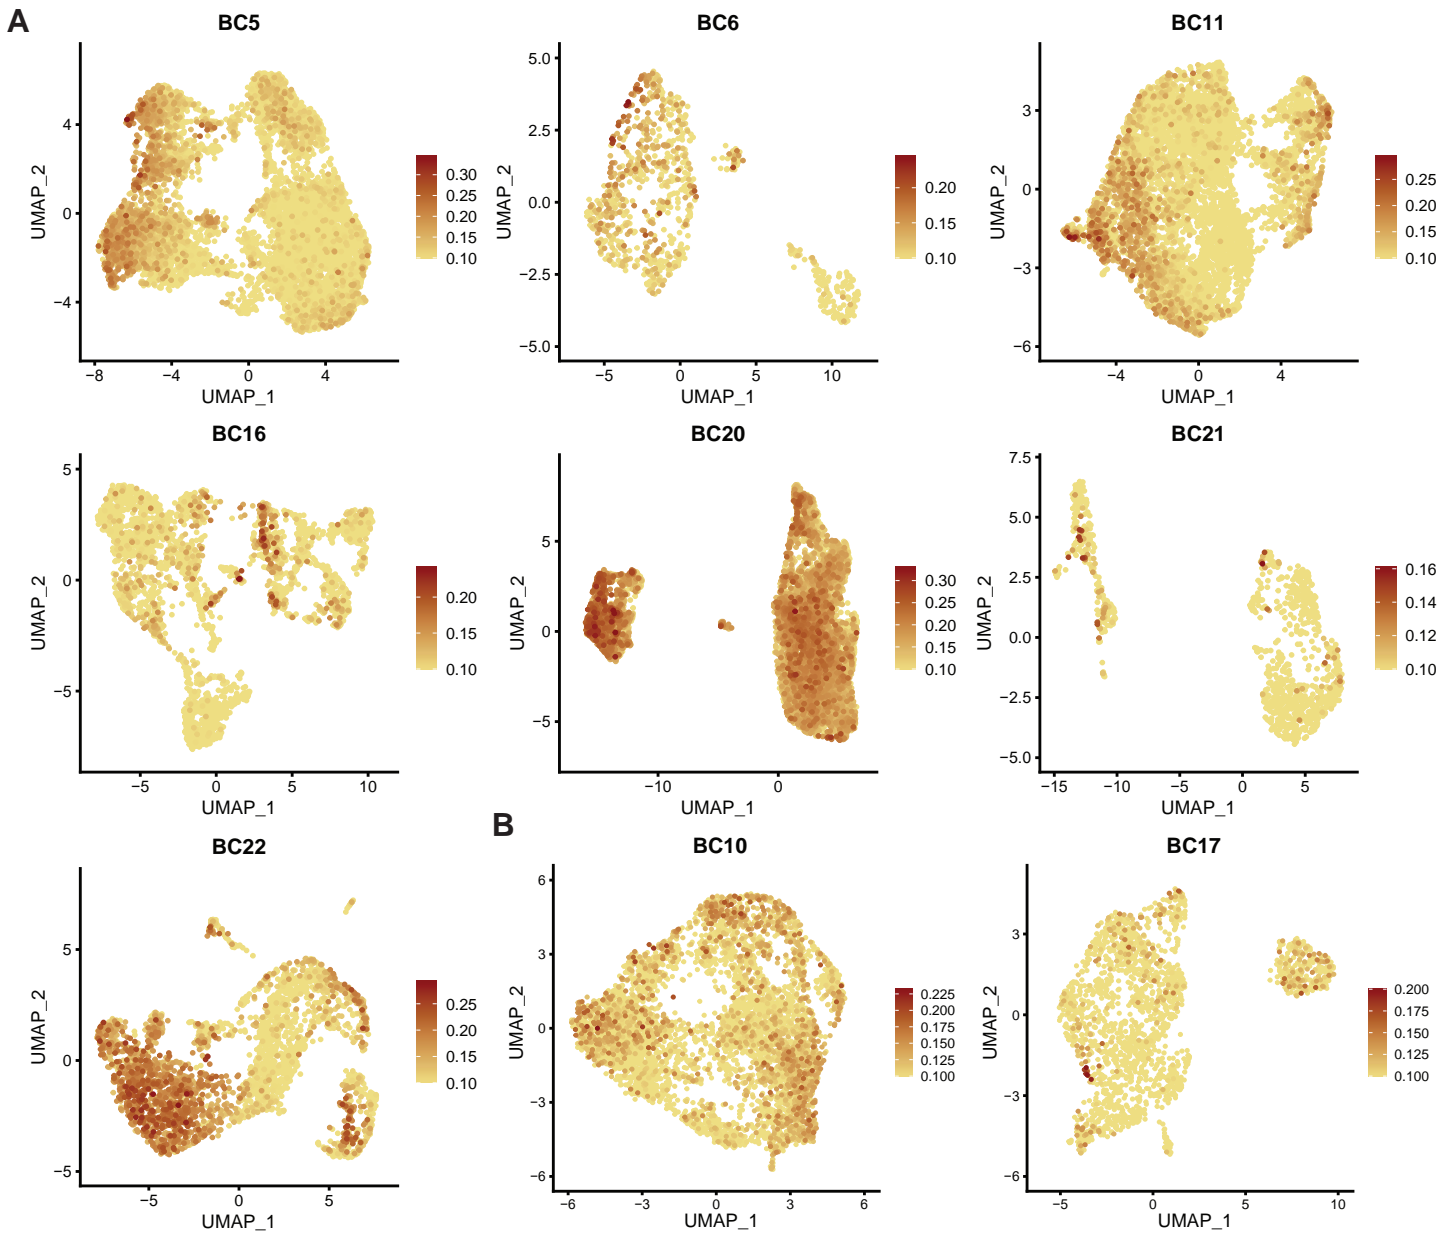

**Figure S19. Heterogeneous activation of glycolysis identified across multiple patient primary and metastatic tumor datasets.** A) Primary and B) metastatic patient tumor FeaturePlots showing glycolysis module score in each of the datasets. Module score for glycolysis was calculated using the 'AddModuleScore' function in Seurat with msigdb HALLMARK\_GLYCOLYSIS genes as input features for the expression program. Patient data is from GSE152048.

Figure S20

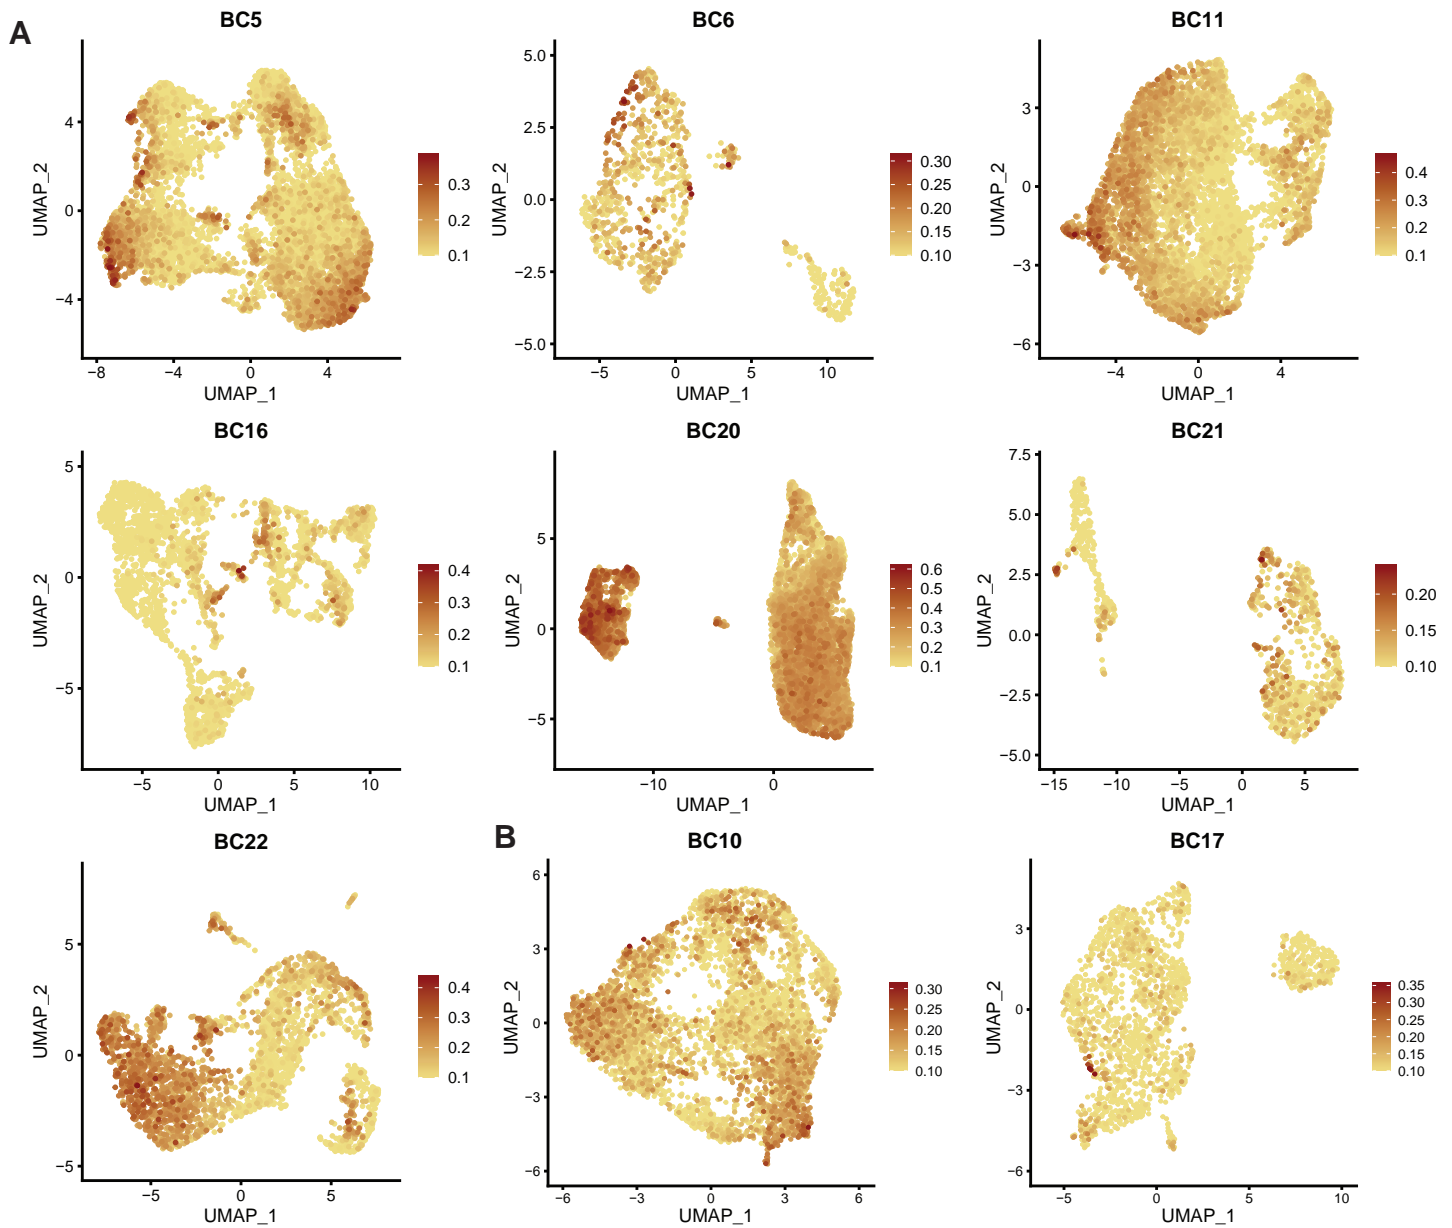

**Figure S20. Heterogeneous activation of hypoxia related genes identified across multiple patient primary and metastatic tumor datasets.** A) Primary and B) metastatic patient tumor FeaturePlots showing hypoxia module score in each of the datasets. Module score for hypoxia was calculated using the 'AddModuleScore' function in Seurat with msigdb HALLMARK\_HYPOXIA genes as input features for the expression program. Patient data is from GSE152048.

Figure S21

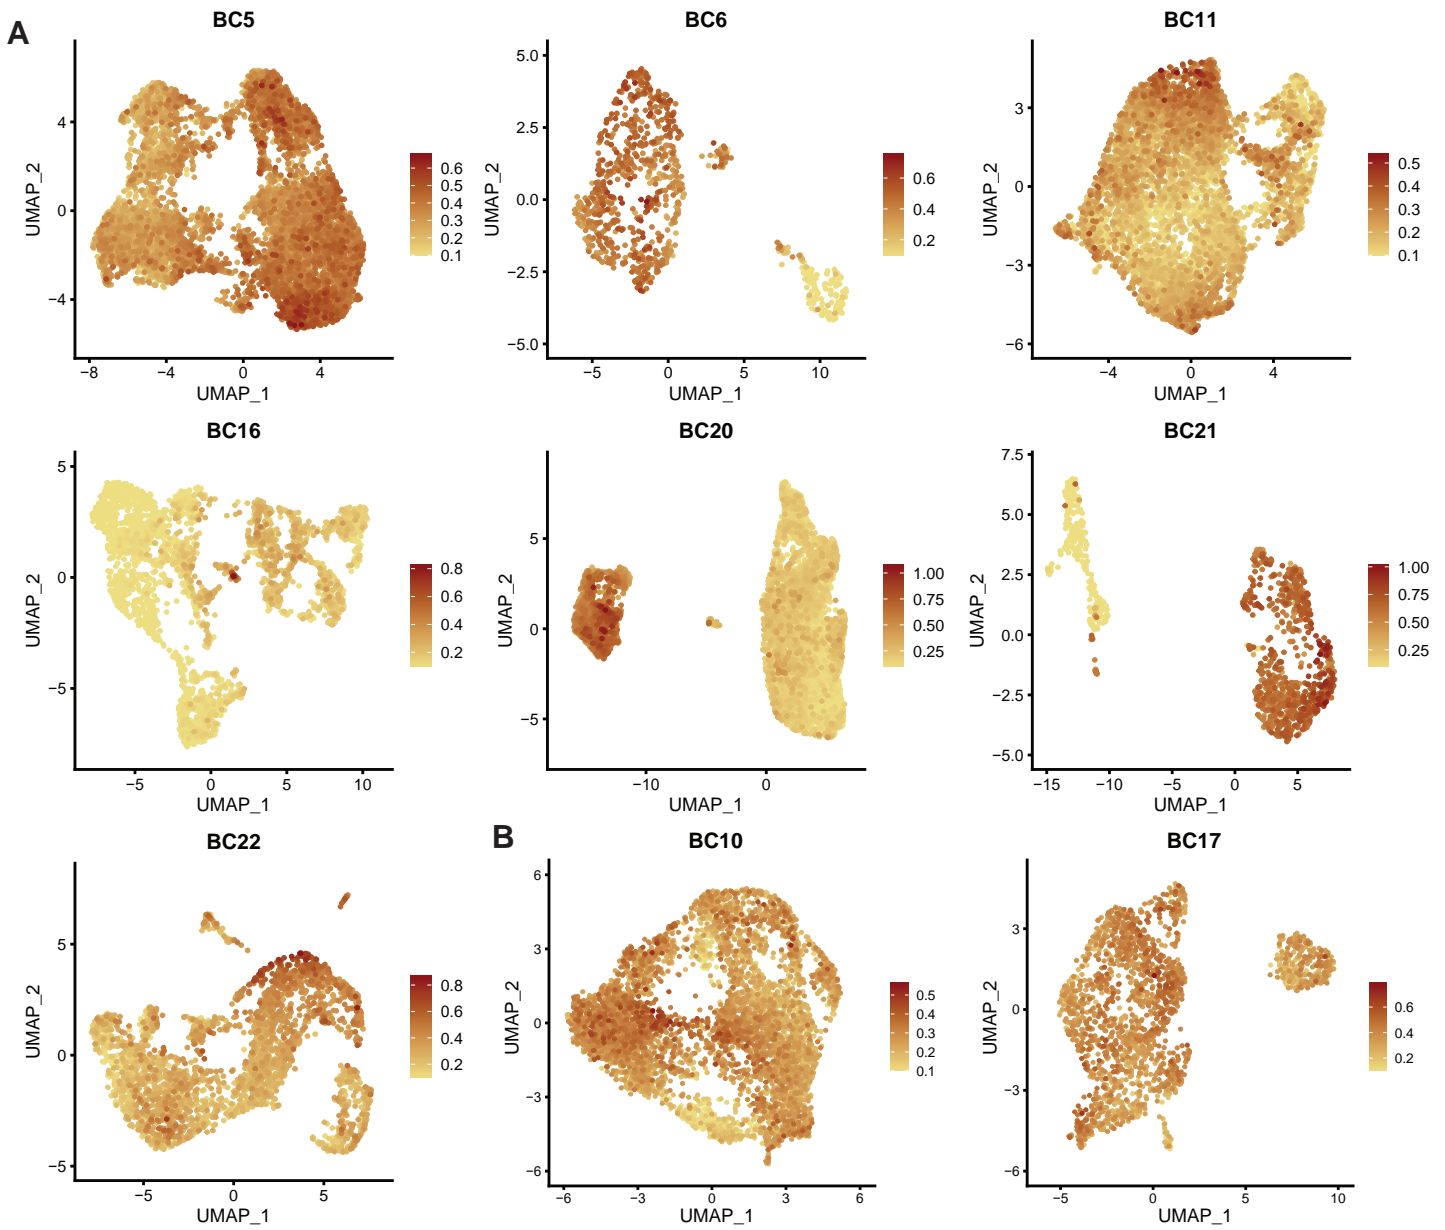

**Figure S21. Heterogeneous activation of EMT related genes identified across multiple patient primary and metastatic tumor datasets.** A) Primary and B) metastatic patient tumor FeaturePlots showing EMT module score in each of the datasets. Module score for EMT was calculated using the 'AddModuleScore' function in Seurat with msigdb HALLMARK\_EPITHELIAL\_MESENCHYMAL\_TRANSITION genes as input features for the expression program. Patient data is from GSE152048.

Figure S22

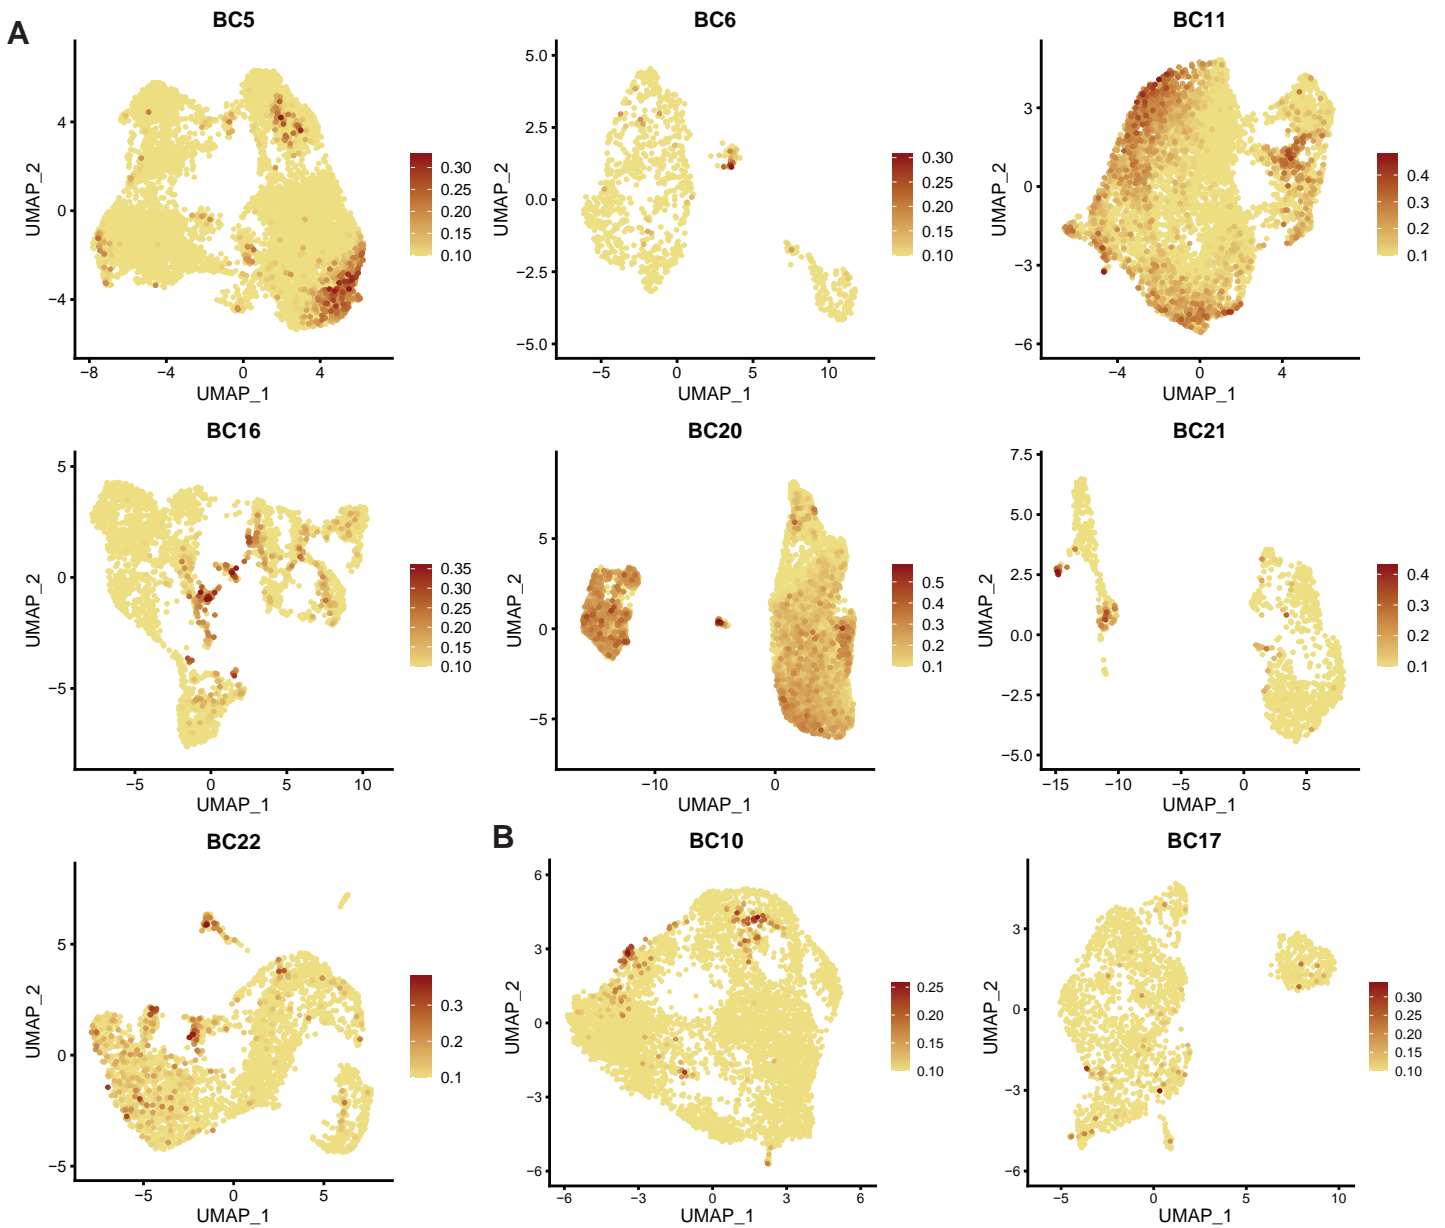

**Figure S22. Heterogeneous activation of 'TNF $\alpha$  signaling via NF $\kappa$ B' related genes identified across multiple patient primary and metastatic tumor datasets.** A) Primary and B) metastatic patient tumor FeaturePlots showing TNF $\alpha$  signaling via NF $\kappa$ B module score in each of the datasets. Module score for TNF $\alpha$  signaling via NF $\kappa$ B was calculated using the 'AddModuleScore' function in Seurat with msigdb HALLMARK\_TNF $\alpha$ \_SIGNALING\_VIA\_NFKB genes as input features for the expression program. Patient data is from GSE152048.
