# Supplementary material for: Osteosarcoma tumors maintain intra-tumoral transcriptional heterogeneity during bone and lung colonization
Source: PubMed Central journal article supplement (PMC10142502; doi:10.1186/s12915-023-01593-3), 2023-04-27
Supplement: 12915_2023_1593_MOESM13_ESM.pdf [file 12915_2023_1593_MOESM13_ESM.pdf]

Figure S23

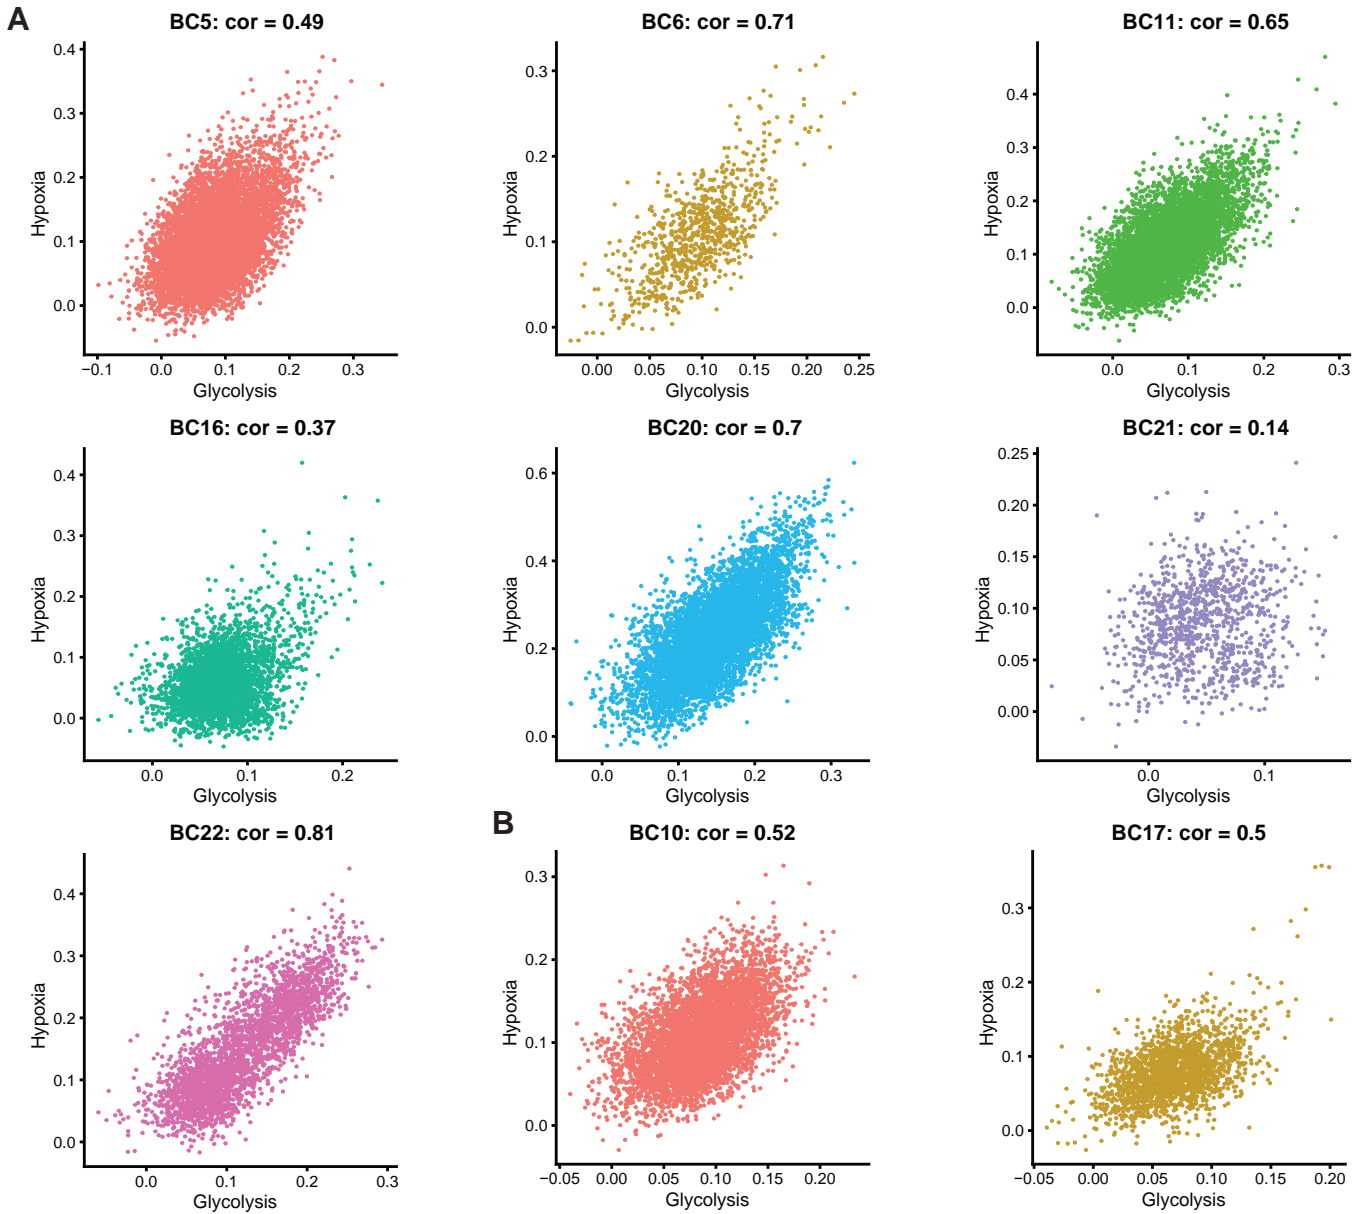

**Figure S23. Correlation analysis for multiple patient primary and metastatic tumor datasets reveals strong correlation between glycolysis and hypoxia module scores.** A) Primary and B) metastatic patient tumor scatter plots using the 'FeatureScatter' function in Seurat for glycolysis and hypoxia module scores in each of the datasets. Seurat-calculated correlation coefficient for each analysis is shown in the title above each plot. Patient data is from GSE152048.

Figure S24

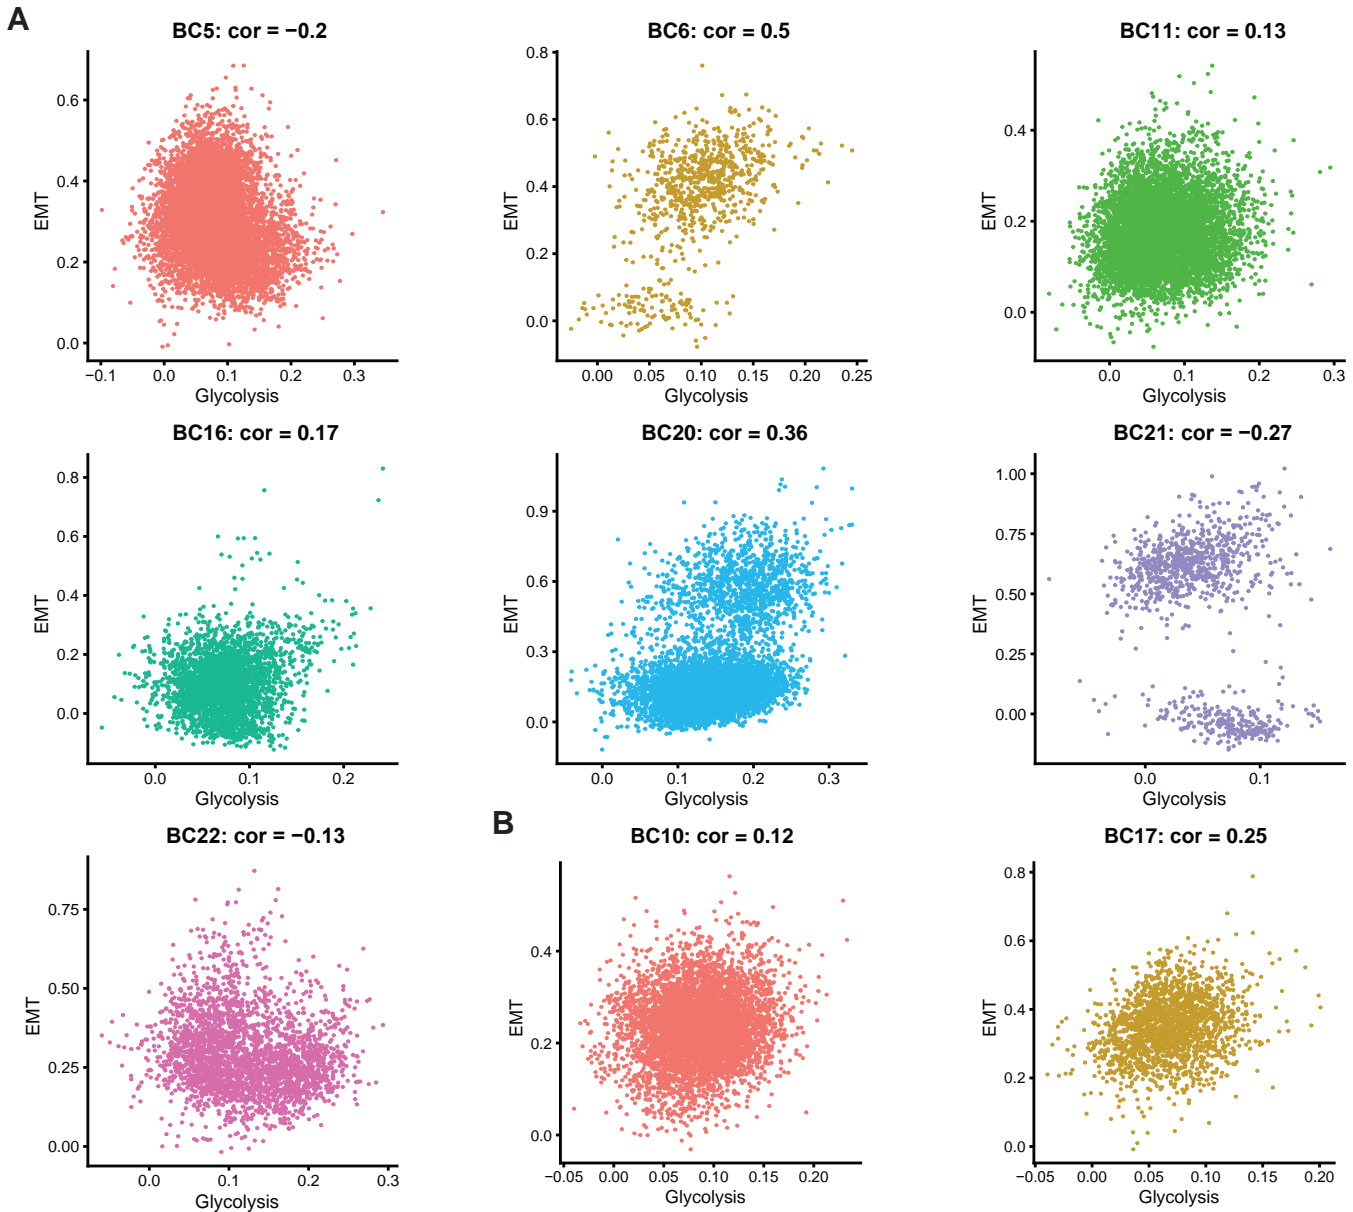

**Figure S24. Correlation analysis for multiple patient primary and metastatic tumor datasets reveals minimal correlation between glycolysis and EMT module scores.** A) Primary and B) metastatic patient tumor scatter plots using the 'FeatureScatter' function in Seurat for glycolysis and EMT module scores in each of the datasets. Seurat-calculated correlation coefficient for each analysis is shown in the title above each plot. Patient data is from GSE152048.

Figure S25

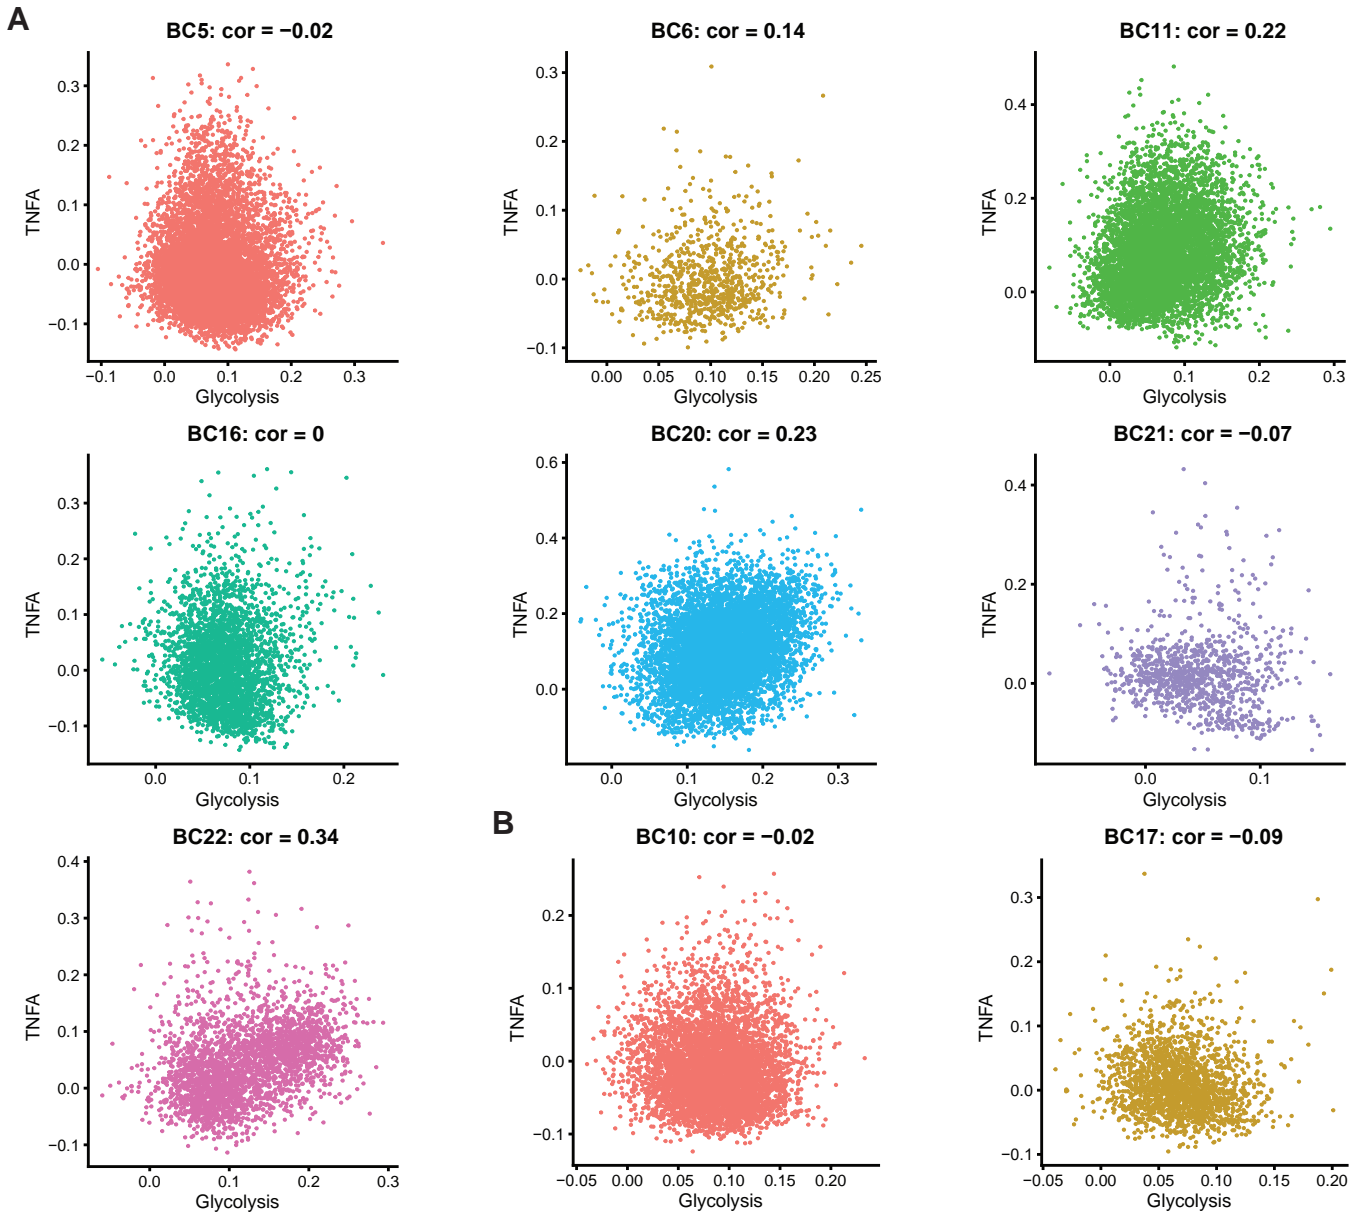

**Figure S25. Correlation analysis for multiple patient primary and metastatic tumor datasets reveals minimal correlation between glycolysis and 'TNF $\alpha$  signaling via NF $\kappa$ B' module scores. A) Primary and B) metastatic patient tumor scatter plots using the 'FeatureScatter' function in Seurat for glycolysis and TNF $\alpha$  signaling via NF $\kappa$ B module scores in each of the datasets. Seurat-calculated correlation coefficient for each analysis is shown in the title above each plot. Patient data is from GSE152048.**

Figure S26

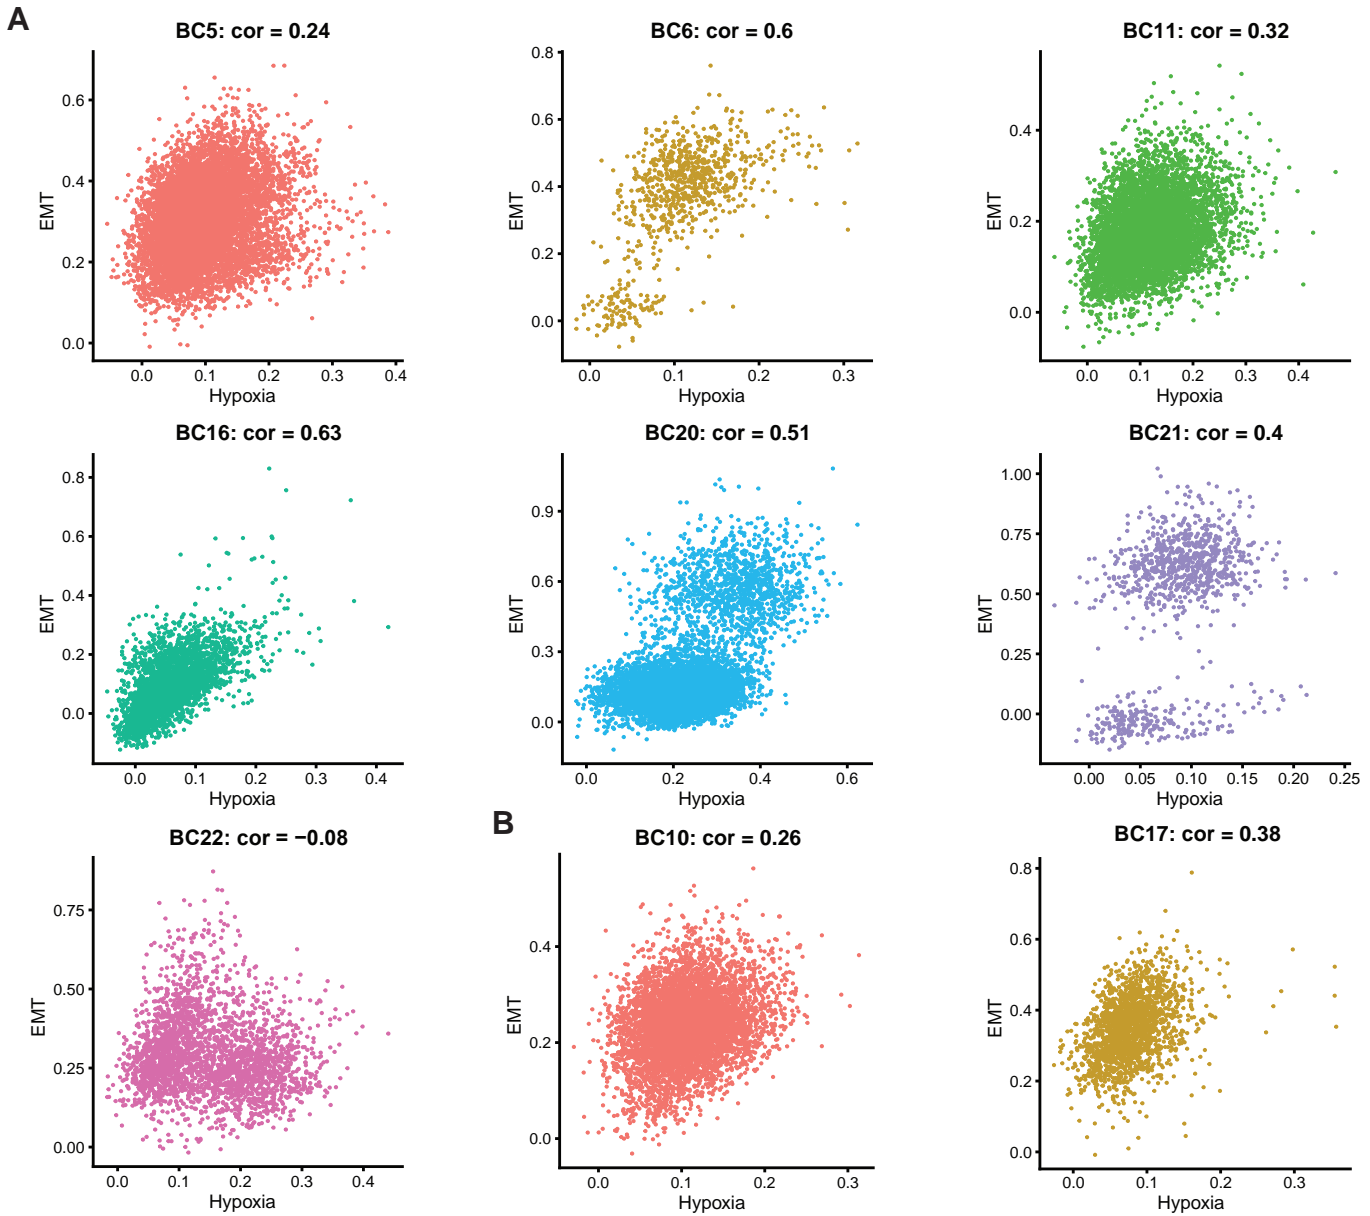

**Figure S26. Correlation analysis for multiple patient primary and metastatic tumor datasets reveals mixed correlation between hypoxia and EMT module scores.** A) Primary and B) metastatic patient tumor scatter plots using the 'FeatureScatter' function in Seurat for hypoxia and EMT module scores in each of the datasets. Seurat-calculated correlation coefficient for each analysis is shown in the title above each plot. Patient data is from GSE152048.

Figure S27

**A**

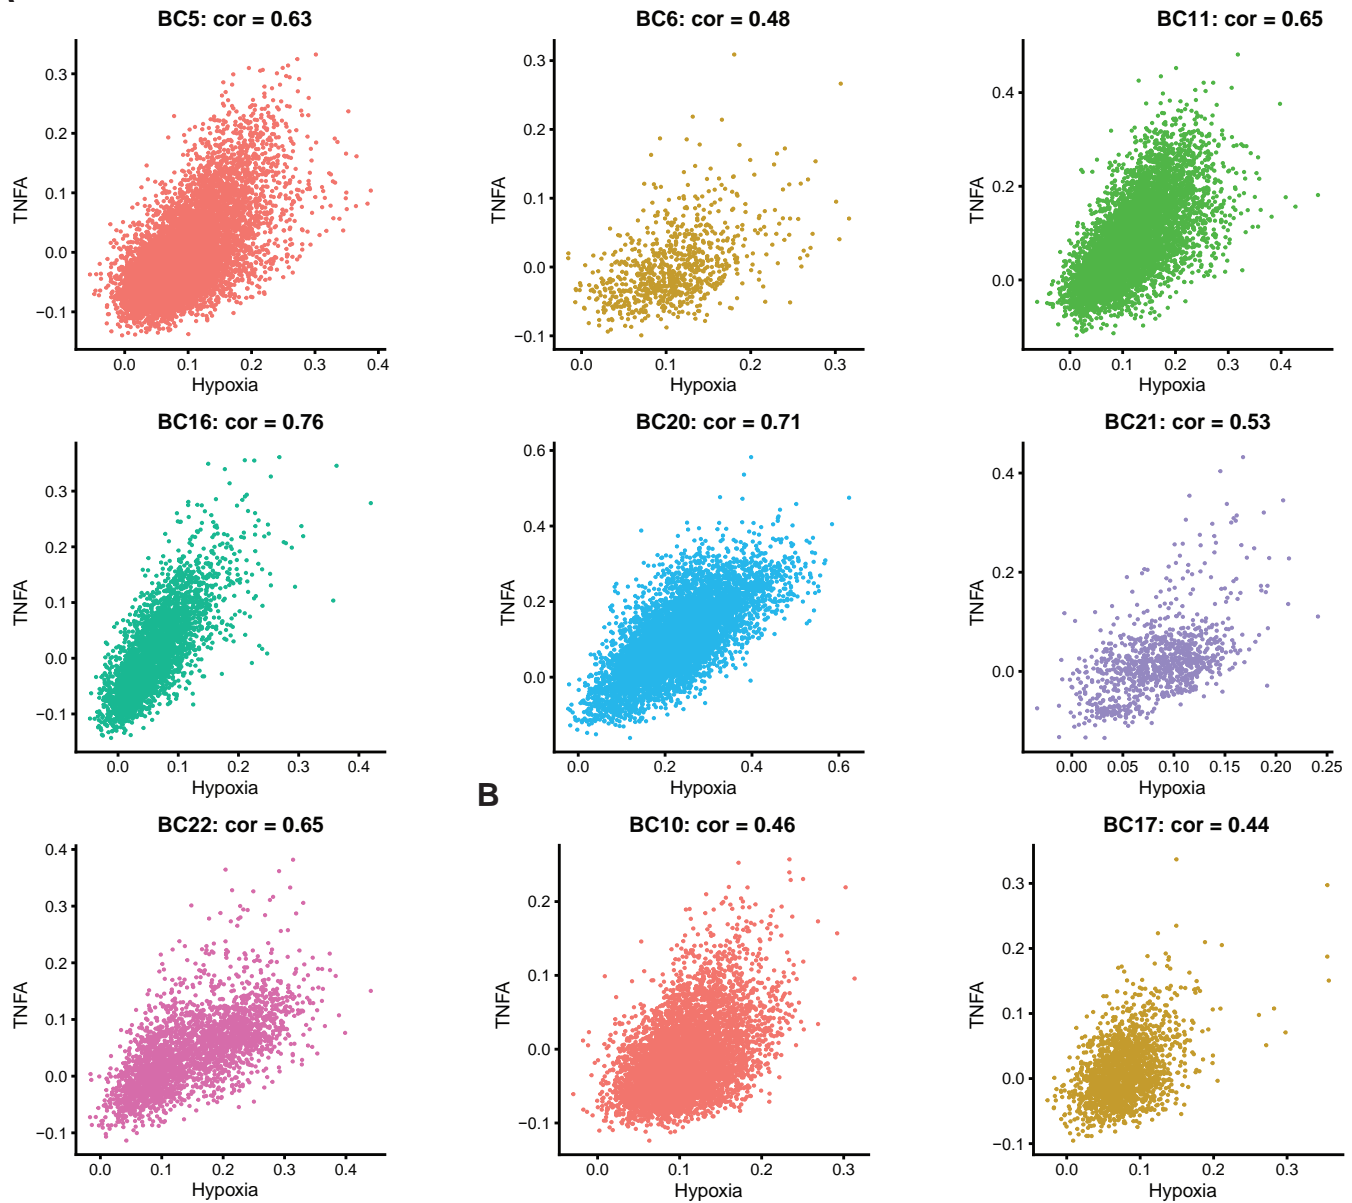

**Figure S27. Correlation analysis for multiple patient primary and metastatic tumor datasets reveals strong correlation between hypoxia and 'TNF $\alpha$  signaling via NF $\kappa$ B' module scores. A) Primary and B) metastatic patient tumor scatter plots using the 'FeatureScatter' function in Seurat for hypoxia and TNF $\alpha$  signaling via NF $\kappa$ B module scores in each of the datasets. Seurat-calculated correlation coefficient for each analysis is shown in the title above each plot. Patient data is from GSE152048.**

Figure S28

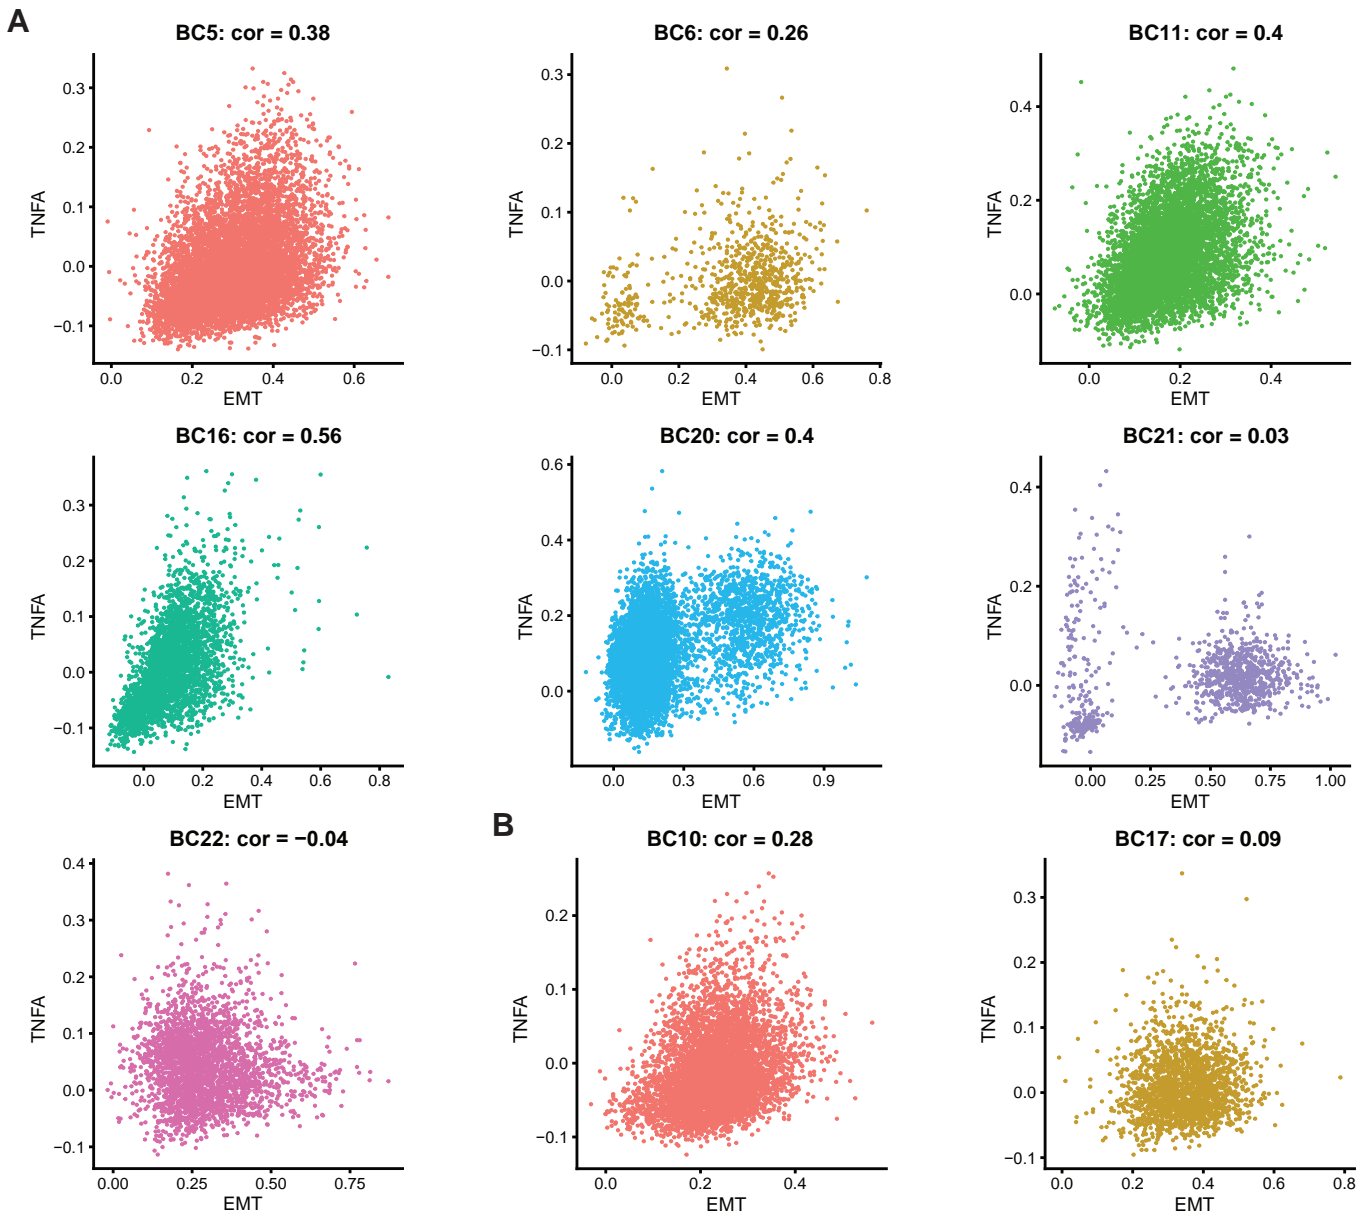

**Figure S28. Correlation analysis for multiple patient primary and metastatic tumor datasets reveals moderate correlation between EMT and 'TNF $\alpha$  signaling via NF $\kappa$ B' module scores.** A) Primary and B) metastatic patient tumor scatter plots using the 'FeatureScatter' function in Seurat for EMT and TNF $\alpha$  signaling via NF $\kappa$ B module scores in each of the datasets. Seurat-calculated correlation coefficient for each analysis is shown in the title above each plot. Patient data is from GSE152048.
