# Supplementary material for: Osteosarcoma tumors maintain intra-tumoral transcriptional heterogeneity during bone and lung colonization
Source: BMC Biol. 2023 Apr 27;21:98. doi: 10.1186/s12915-023-01593-3 (PMC10142502; doi:10.1186/s12915-023-01593-3)
Supplement: Supplementary file 3 — Additional file 3: Figure S2. In-depth analysis of clusters utilized in analyses. [file 12915_2023_1593_MOESM3_ESM.pdf]

Figure S2

A

Figure 1 OS-17 by Clusters

Seurat-assigned clusters (optimized)

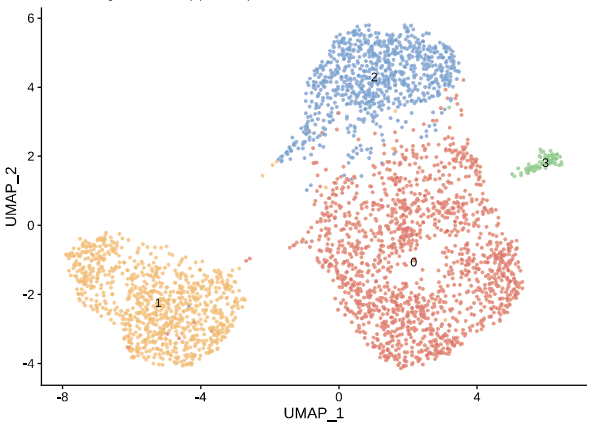

Cluster 0 Genes

Figure 1 OS-17 method

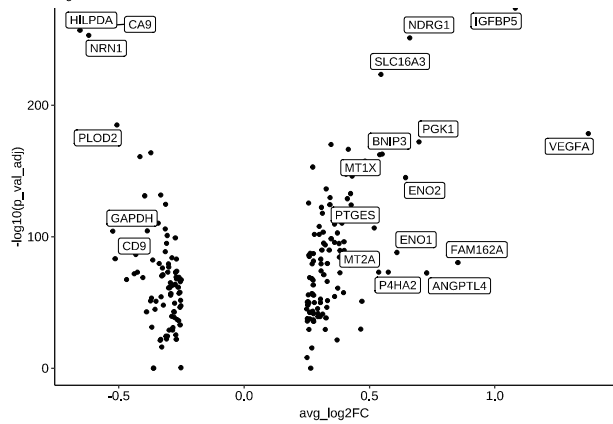

Figure 1 OS-17 Cluster 0

GO-BP Gene Sets

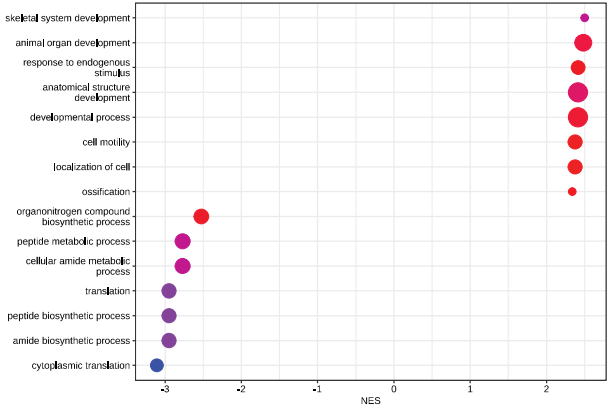

Figure 1 OS-17 Cluster 0

Hallmark Gene Sets

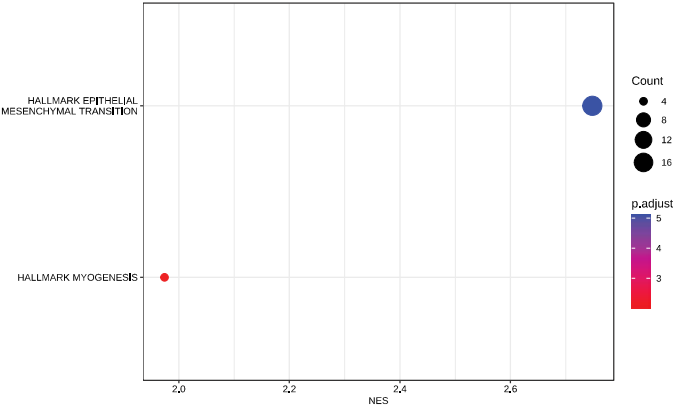

Figure 1 OS-17 by Clusters

Seurat-assigned clusters (optimized)

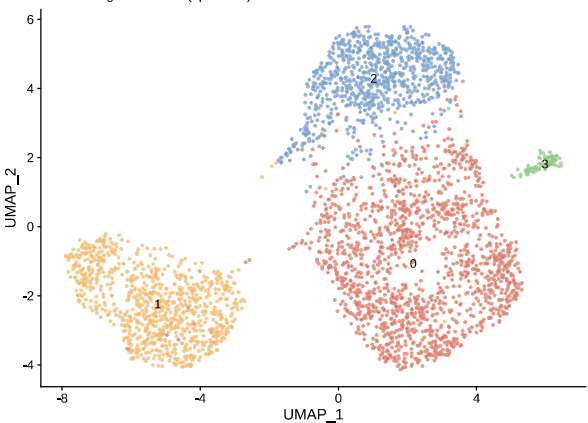

Cluster 1 Genes

Figure 1 OS-17 method

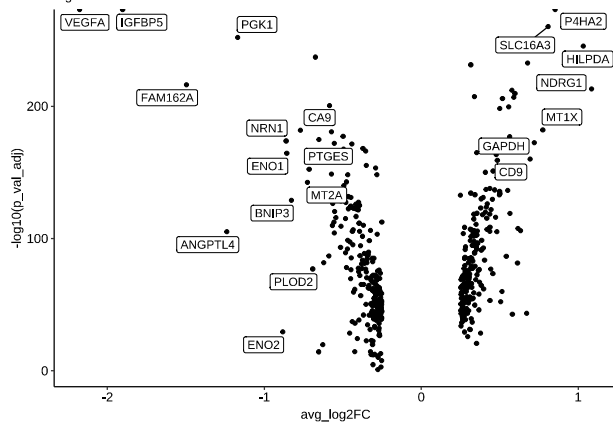

Figure 1 OS-17 Cluster 1

GO-BP Gene Sets

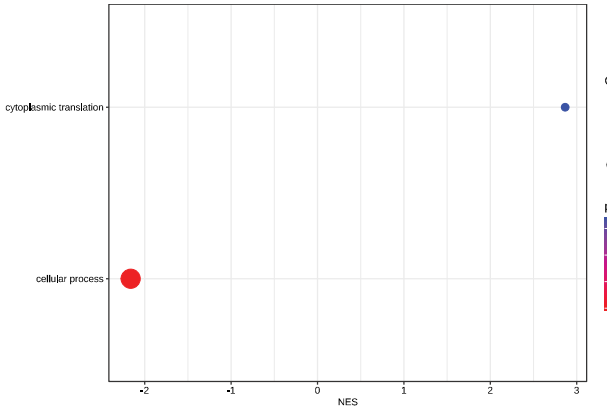

Figure 1 OS-17 Cluster 1

Hallmark Gene Sets

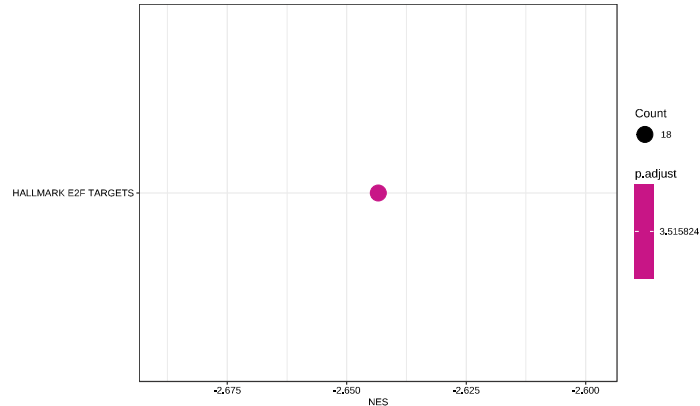

Figure S2 continued

Figure 1 OS-17 by Clusters

Seurat-assigned clusters (optimized)

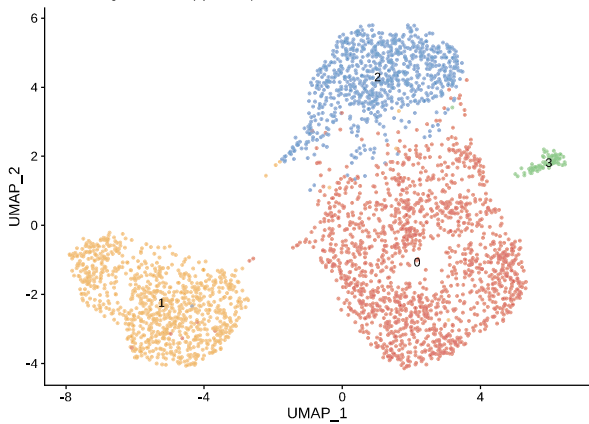

Cluster 2 Genes

Figure 1 OS-17 method

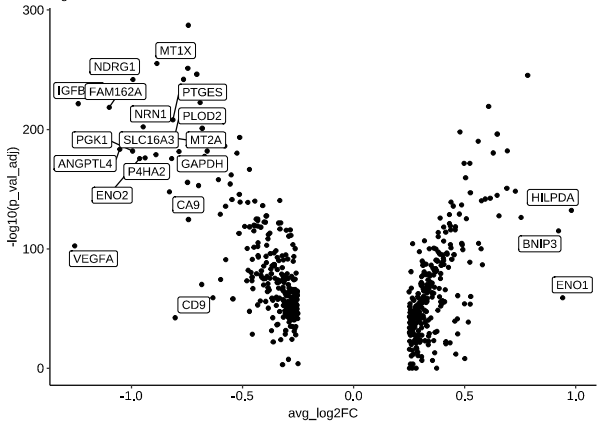

Figure 1 OS-17 Cluster 2

GO-BP Gene Sets

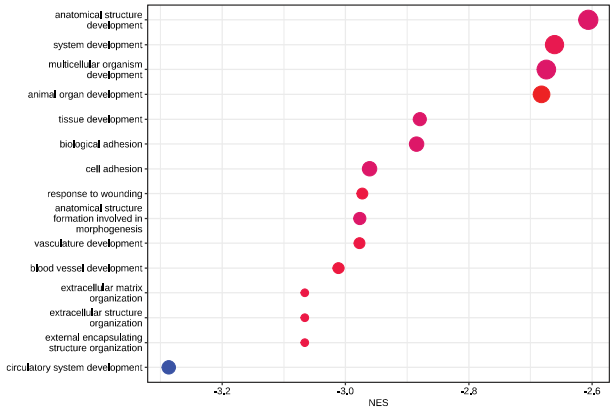

Figure 1 OS-17 Cluster 2

Hallmark Gene Sets

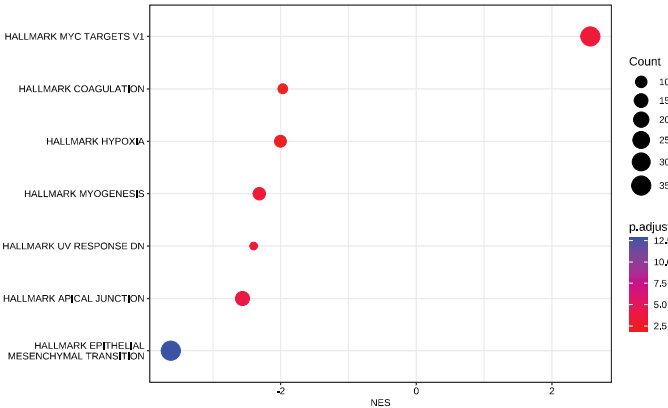

Figure 1 OS-17 by Clusters

Seurat-assigned clusters (optimized)

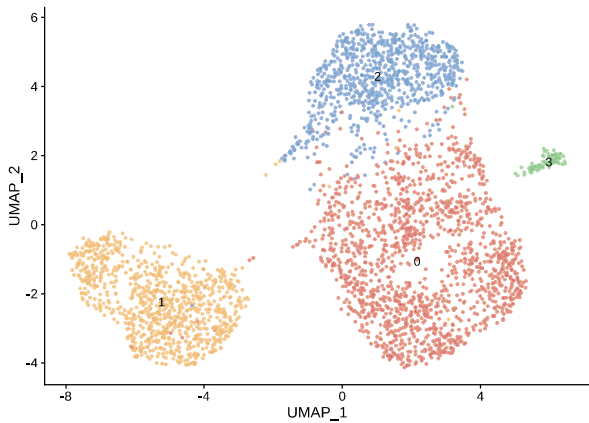

Cluster 3 Genes

Figure 1 OS-17 method

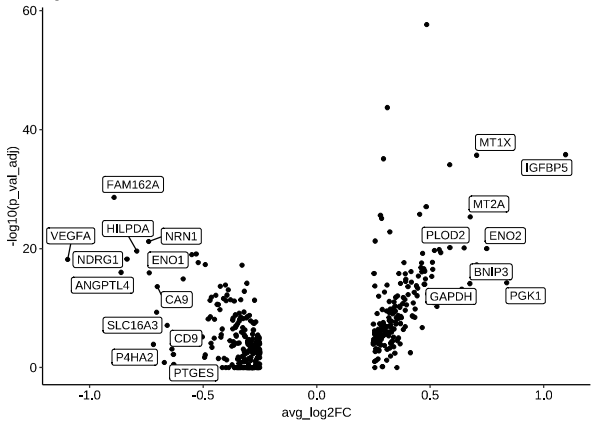

Figure 1 OS-17 Cluster 3

GO-BP Gene Sets

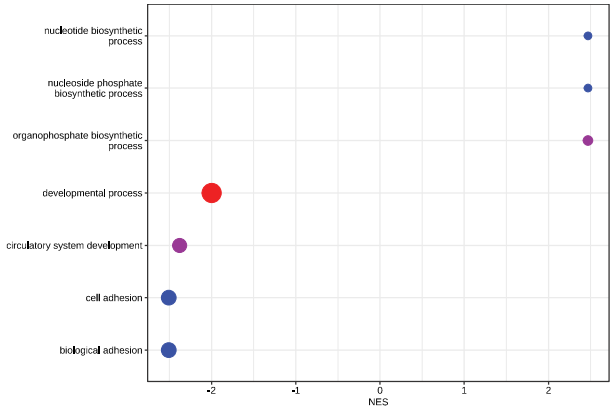

Figure 1 OS-17 Cluster 3

Hallmark Gene Sets

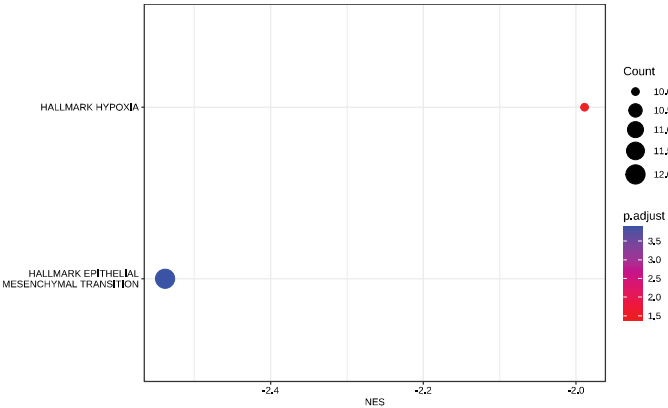

Figure S2 continued

B

Figure 1 NCH-OS-7 by Clusters  
Seurat-assigned clusters (optimized)

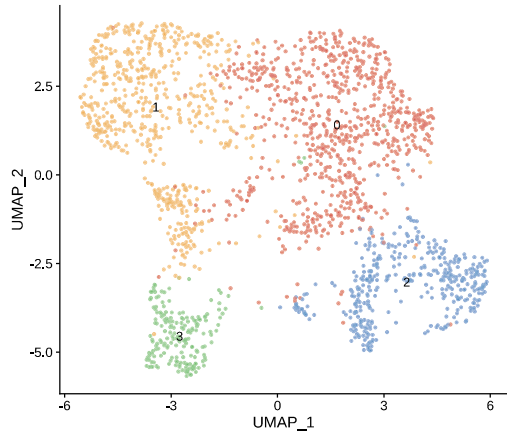

Figure 1 NCH-OS-7 Cluster 0  
GO-BP Gene Sets

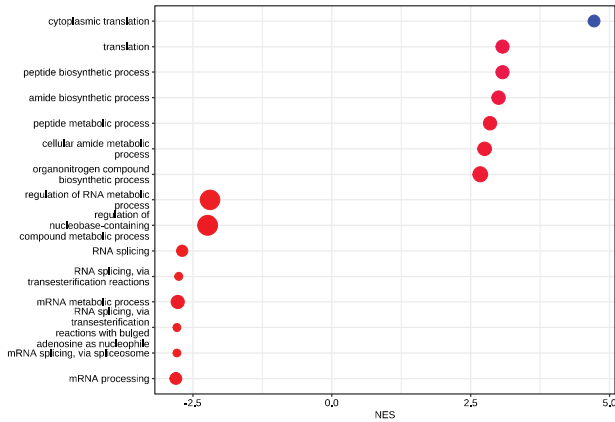

Cluster 0 Genes  
Figure 1 NCH-OS-7 method

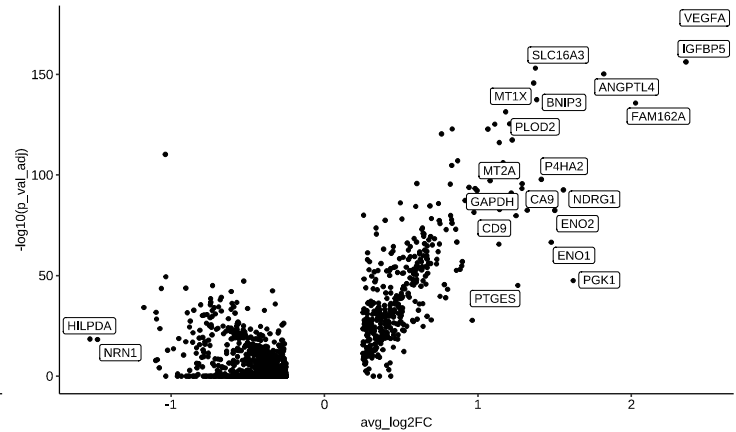

Figure 1 NCH-OS-7 Cluster 0  
Hallmark Gene Sets

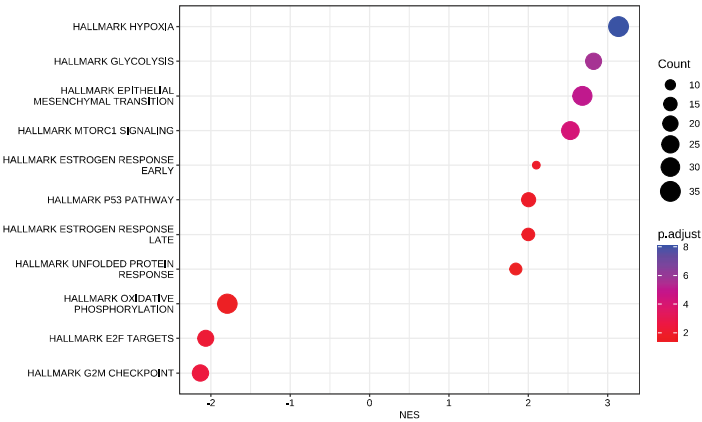

Figure 1 NCH-OS-7 by Clusters  
Seurat-assigned clusters (optimized)

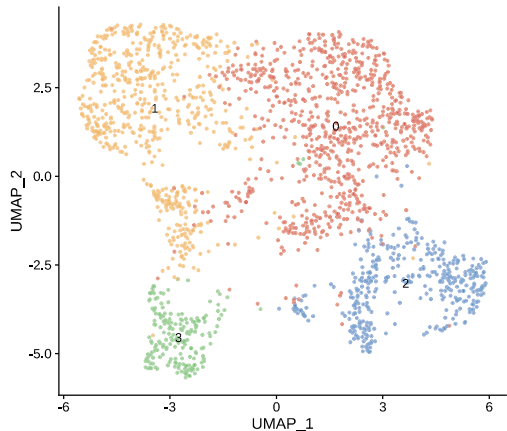

Figure 1 NCH-OS-7 Cluster 1  
GO-BP Gene Sets

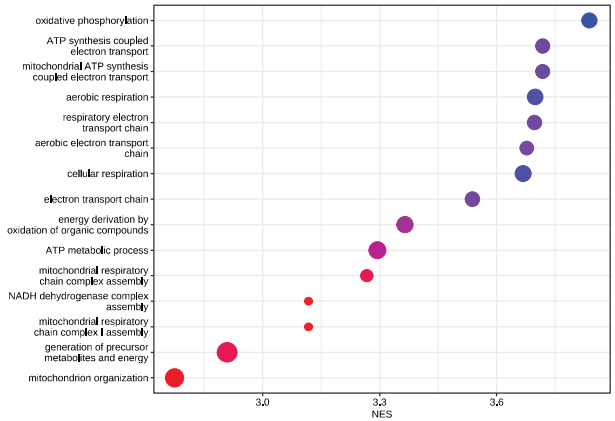

Cluster 1 Genes  
Figure 1 NCH-OS-7 method

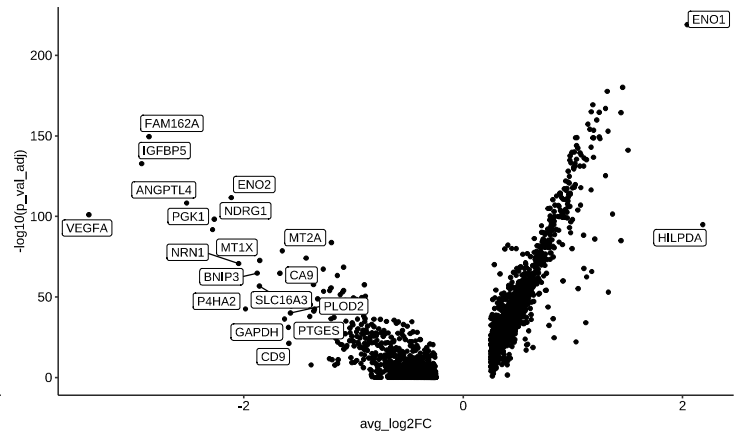

Figure 1 NCH-OS-7 Cluster 1  
Hallmark Gene Sets

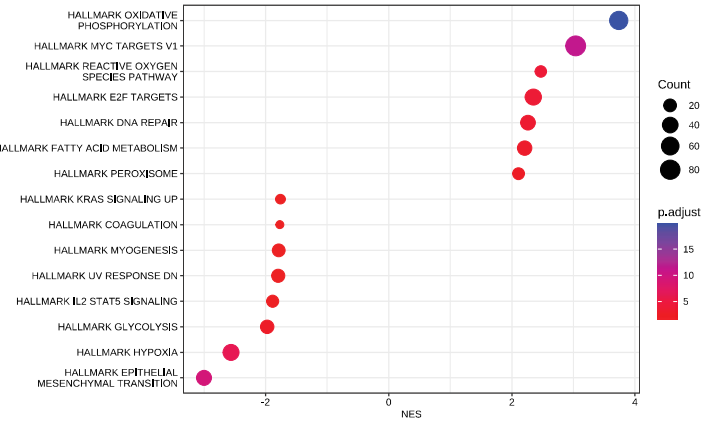

Figure S2 continued

Figure 1 NCH-OS-7 by Clusters  
Seurat-assigned clusters (optimized)

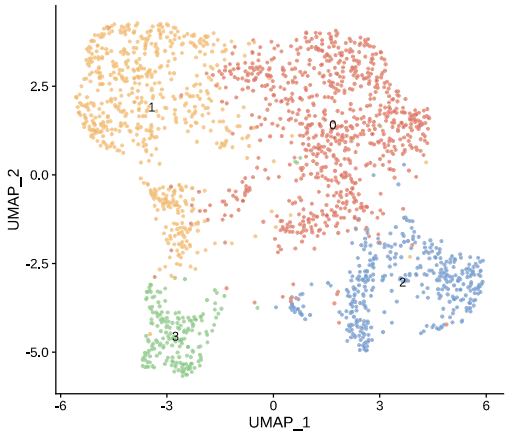

Cluster 2 Genes  
Figure 1 NCH-OS-7 method

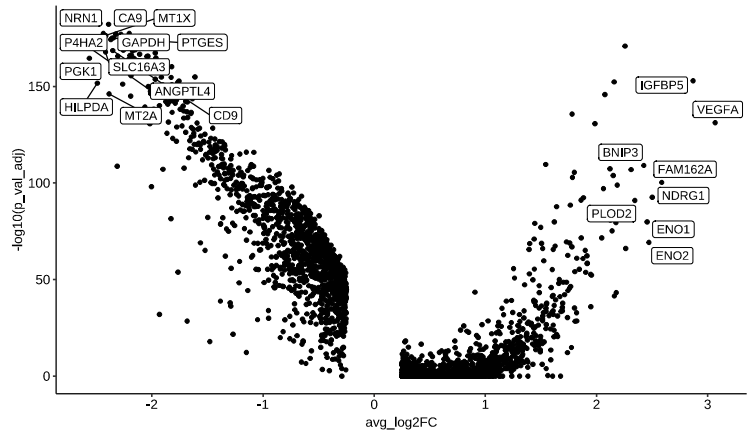

Figure 1 NCH-OS-7 Cluster 2  
GO-BP Gene Sets

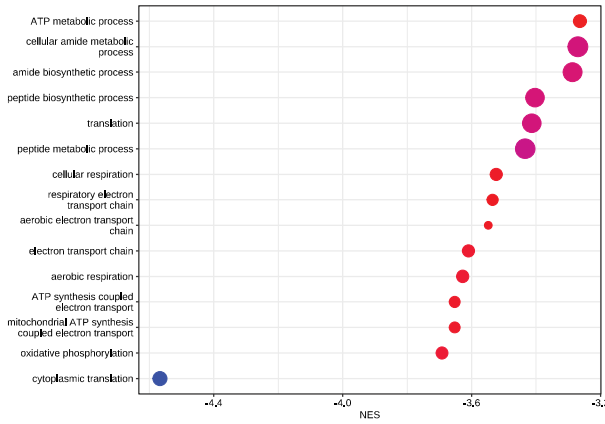

Figure 1 NCH-OS-7 Cluster 2  
Hallmark Gene Sets

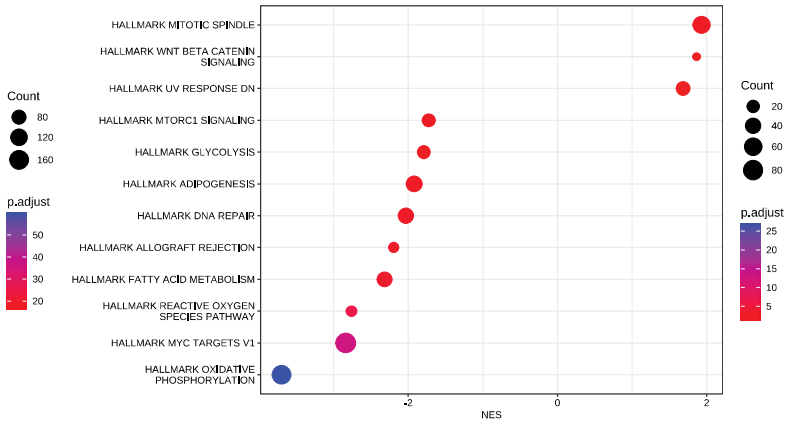

Figure 1 NCH-OS-7 by Clusters  
Seurat-assigned clusters (optimized)

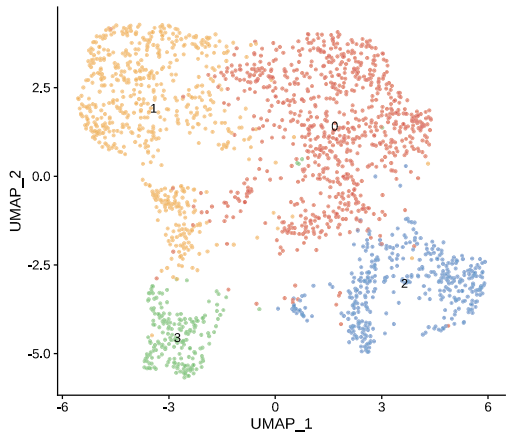

Cluster 3 Genes  
Figure 1 NCH-OS-7 method

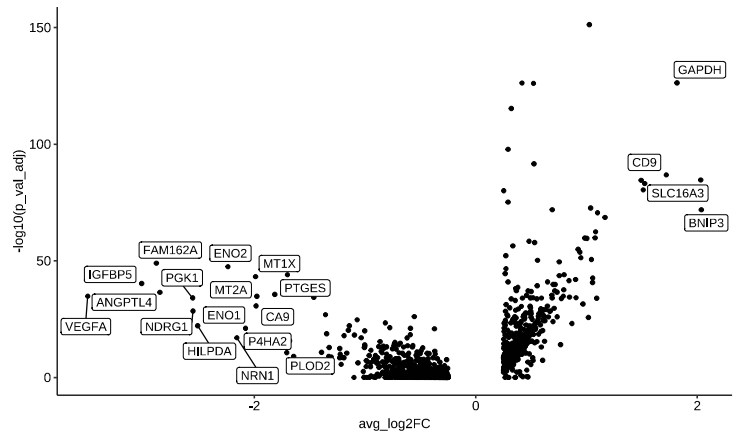

Figure 1 NCH-OS-7 Cluster 3  
GO-BP Gene Sets

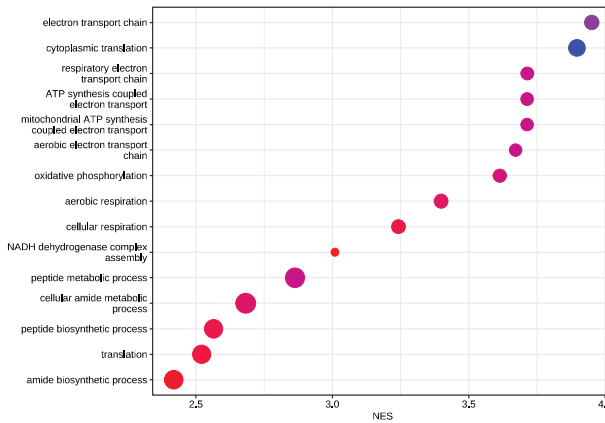

Figure 1 NCH-OS-7 Cluster 3  
Hallmark Gene Sets

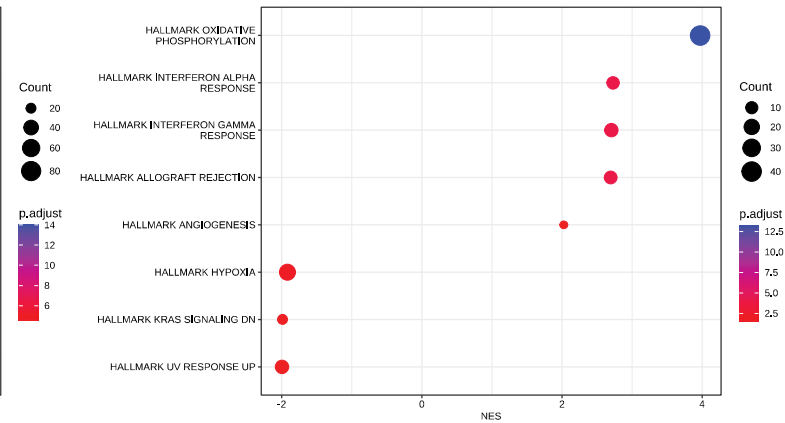

Figure S2 continued

C

Figure 3 OS-17 by Clusters  
Seurat-assigned clusters (optimized)

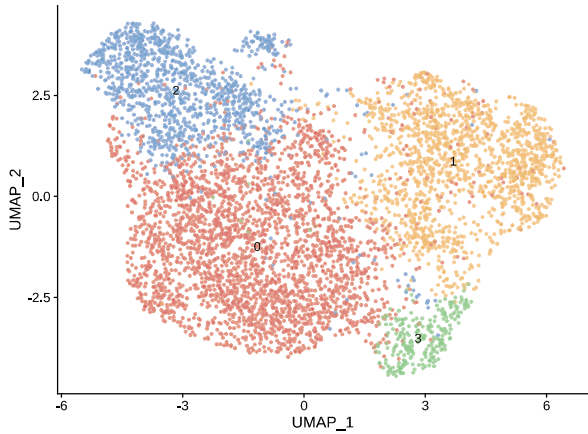

Figure 3 OS-17 Cluster 0  
GO-BP Gene Sets

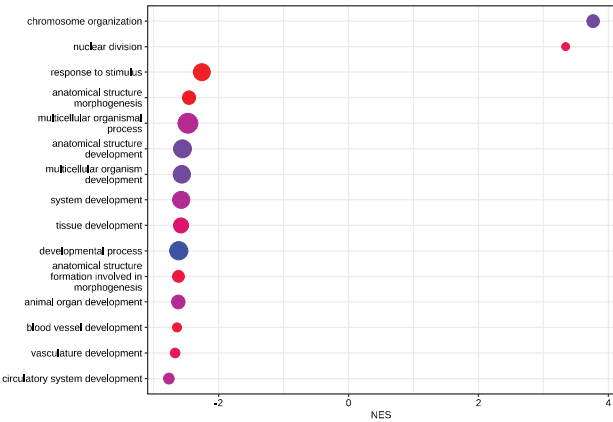

Cluster 0 Genes  
Figure 3 OS-17 method

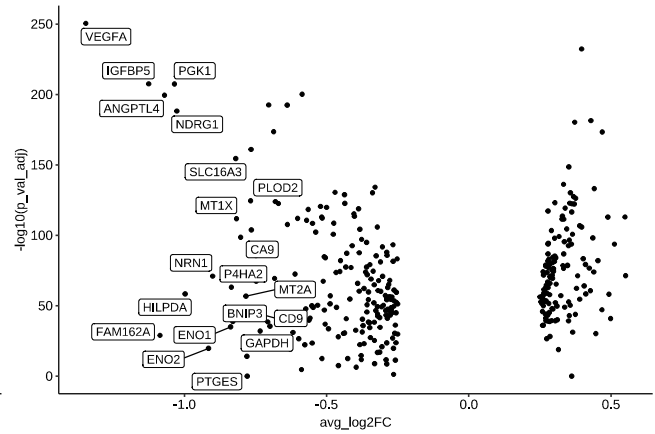

Figure 3 OS-17 Cluster 0  
Hallmark Gene Sets

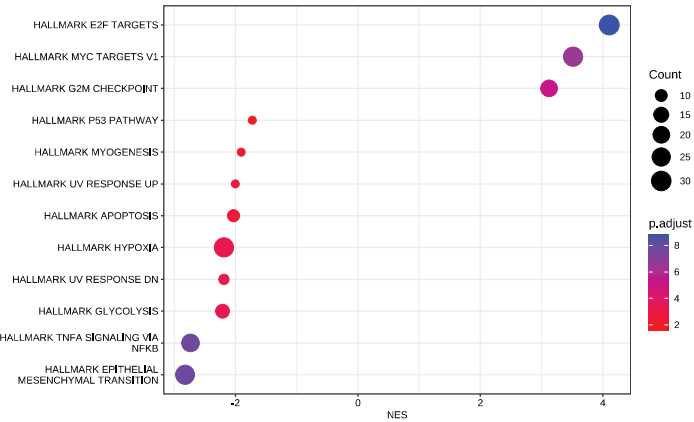

Figure 3 OS-17 by Clusters  
Seurat-assigned clusters (optimized)

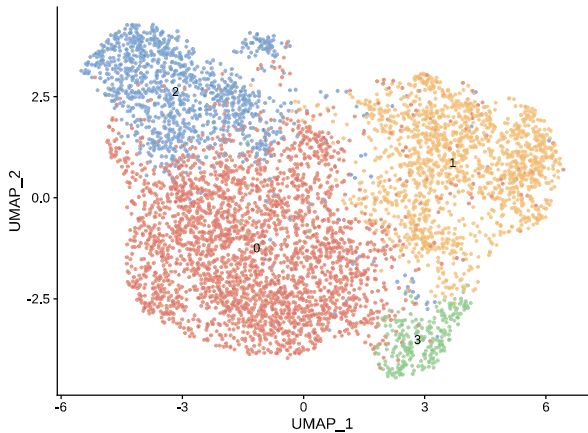

Figure 3 OS-17 Cluster 1  
GO-BP Gene Sets

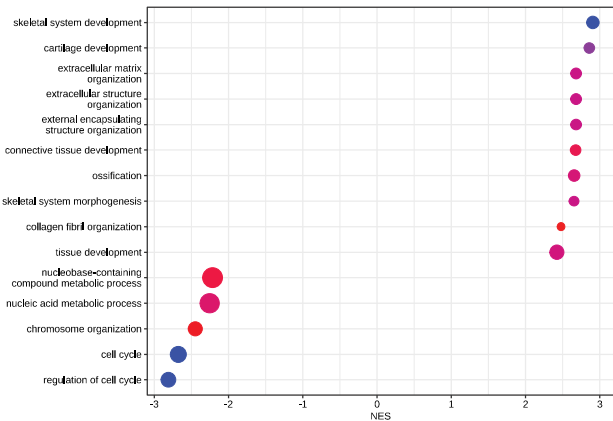

Cluster 1 Genes  
Figure 3 OS-17 method

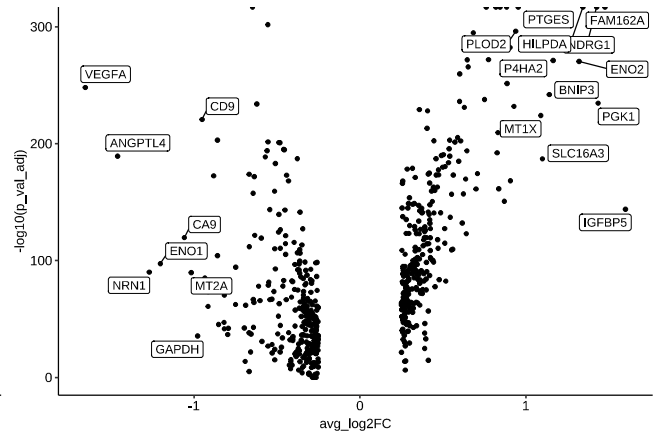

Figure 3 OS-17 Cluster 1  
Hallmark Gene Sets

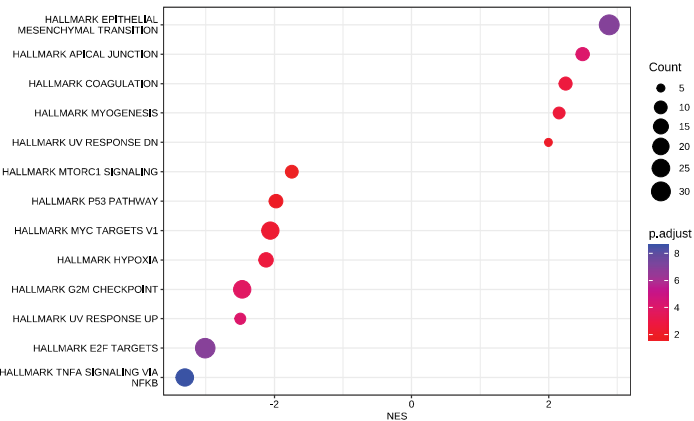

Figure S2 continued

Figure 3 OS-17 by Clusters  
Seurat-assigned clusters (optimized)

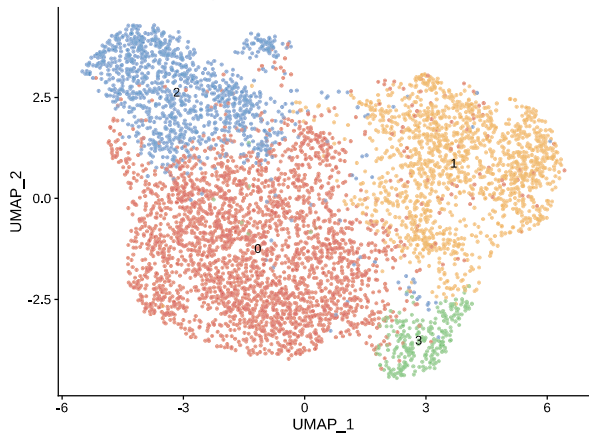

Cluster 2 Genes  
Figure 3 OS-17 method

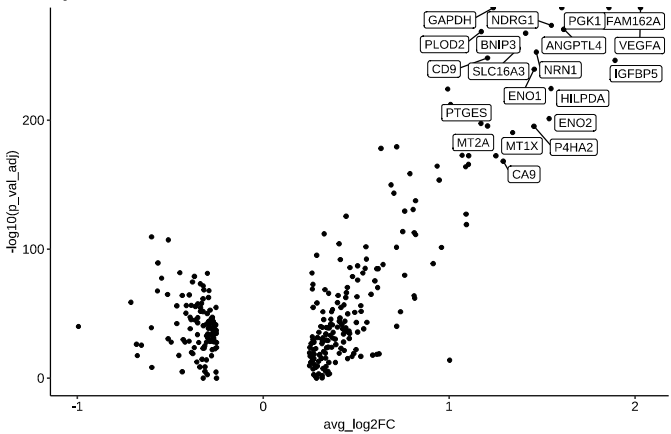

Figure 3 OS-17 Cluster 2  
GO-BP Gene Sets

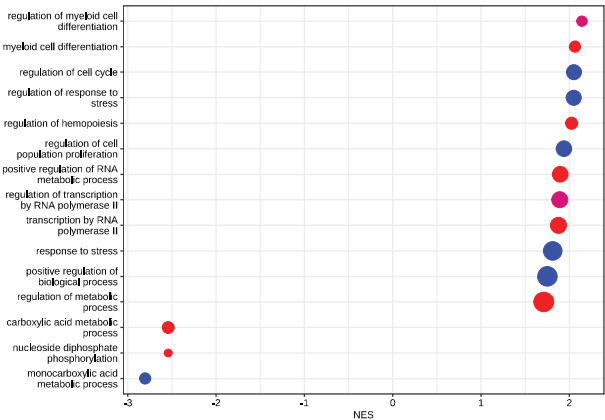

Figure 3 OS-17 Cluster 2  
Hallmark Gene Sets

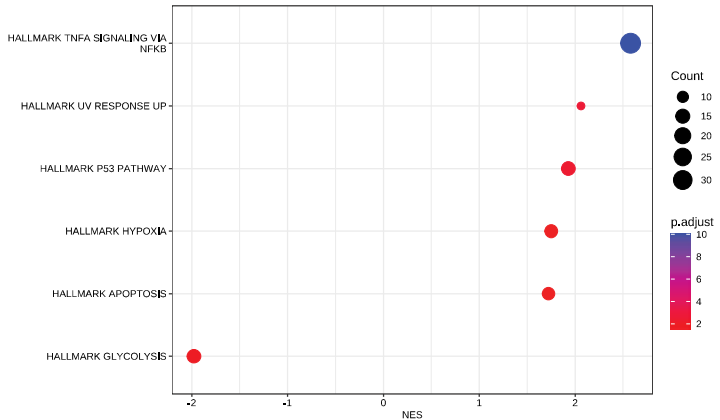

Figure 3 OS-17 by Clusters  
Seurat-assigned clusters (optimized)

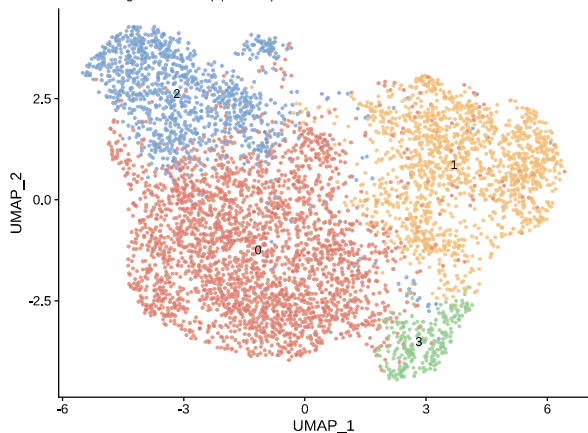

Cluster 3 Genes  
Figure 3 OS-17 method

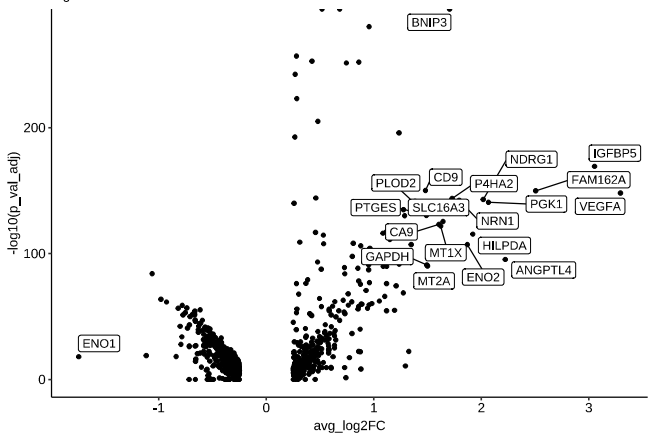

Figure 3 OS-17 Cluster 3  
GO-BP Gene Sets

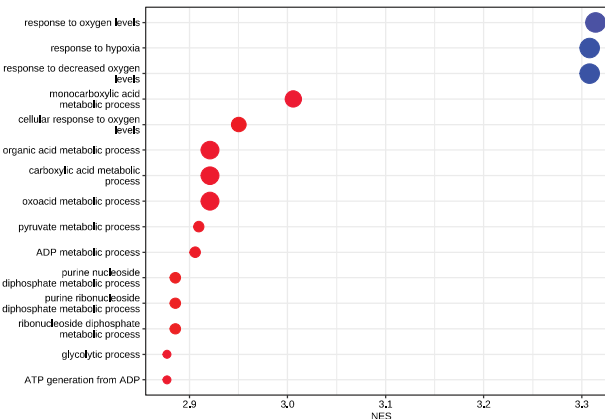

Figure 3 OS-17 Cluster 3  
Hallmark Gene Sets

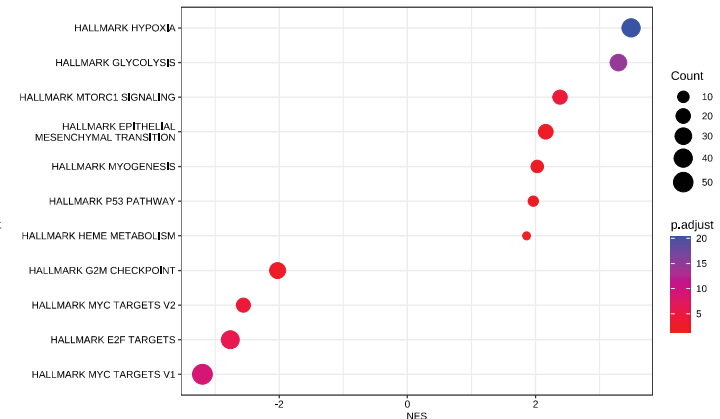

Figure S2 continued

D

Figure 3 143B by Clusters  
Seurat-assigned clusters (optimized)

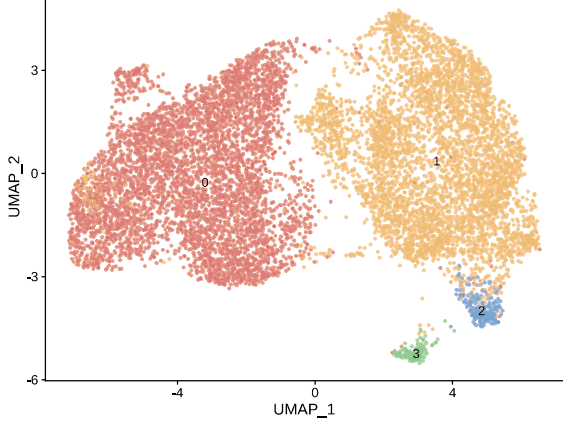

Figure 3 143B Cluster 0  
GO-BP Gene Sets

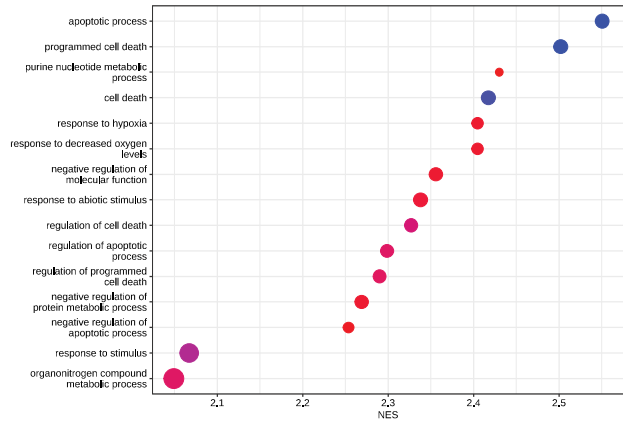

Cluster 0 Genes  
Figure 3 143B method

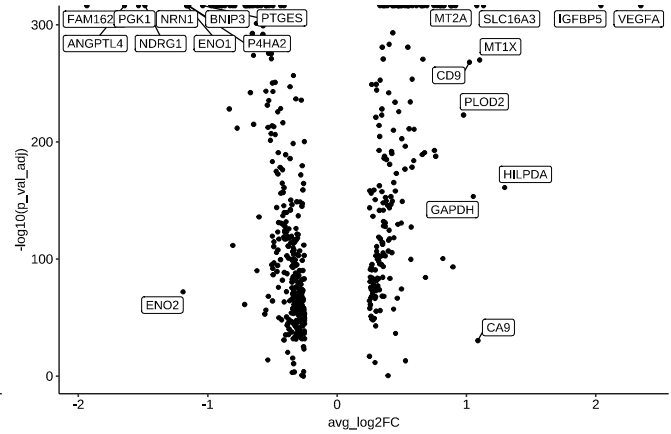

Figure 3 143B Cluster 0  
Hallmark Gene Sets

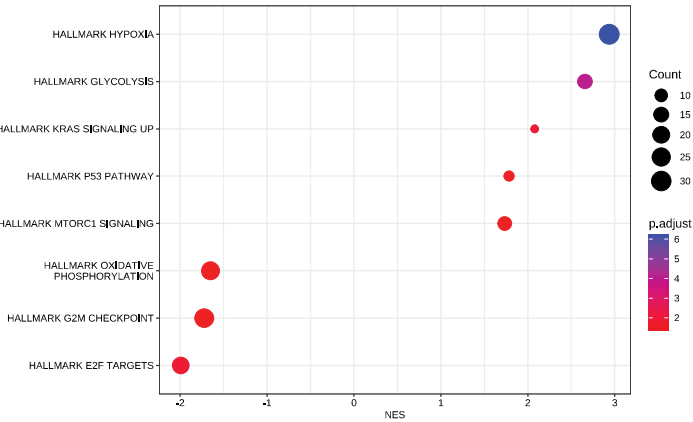

Figure 3 143B by Clusters  
Seurat-assigned clusters (optimized)

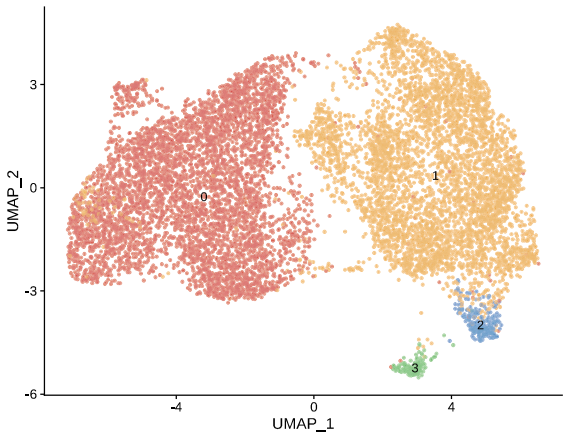

Figure 3 143B Cluster 1  
GO-BP Gene Sets

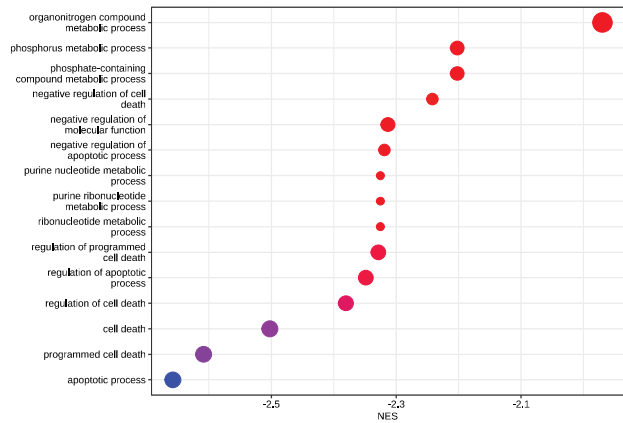

Cluster 1 Genes  
Figure 3 143B method

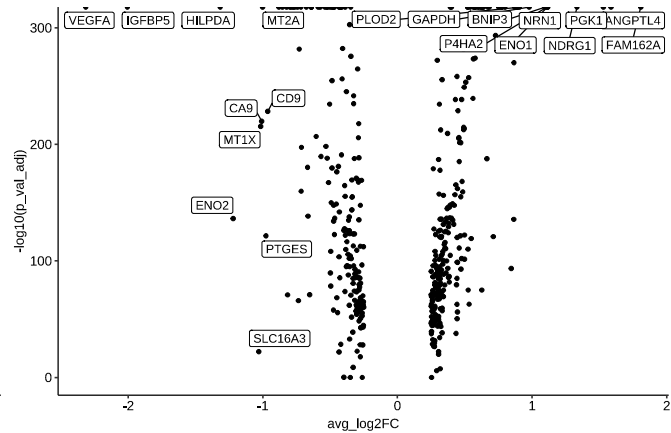

Figure 3 143B Cluster 1  
Hallmark Gene Sets

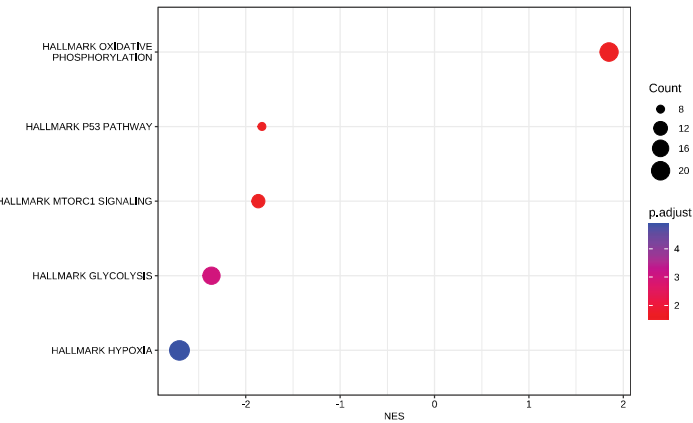

Figure S2 continued

Figure 3 143B by Clusters  
Seurat-assigned clusters (optimized)

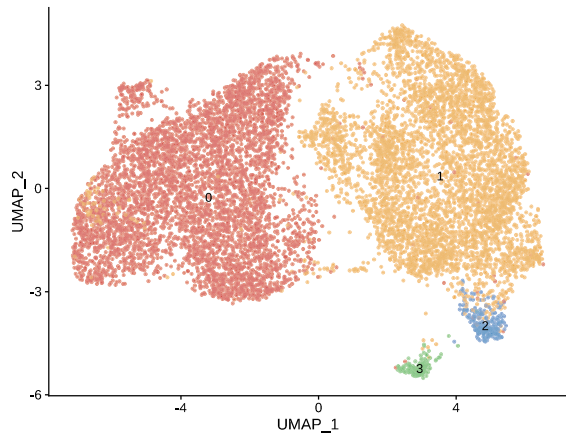

Cluster 2 Genes  
Figure 3 143B method

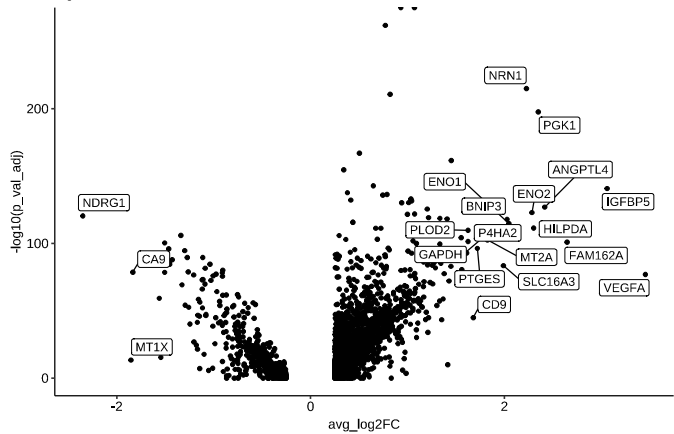

Figure 3 143B Cluster 2  
GO-BP Gene Sets

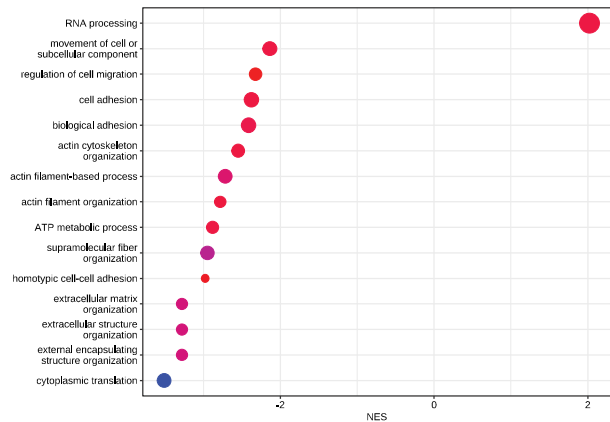

Figure 3 143B Cluster 2  
Hallmark Gene Sets

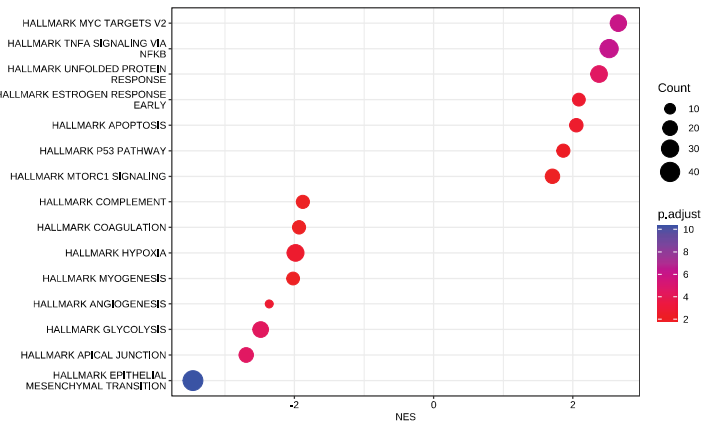

Figure 3 143B by Clusters  
Seurat-assigned clusters (optimized)

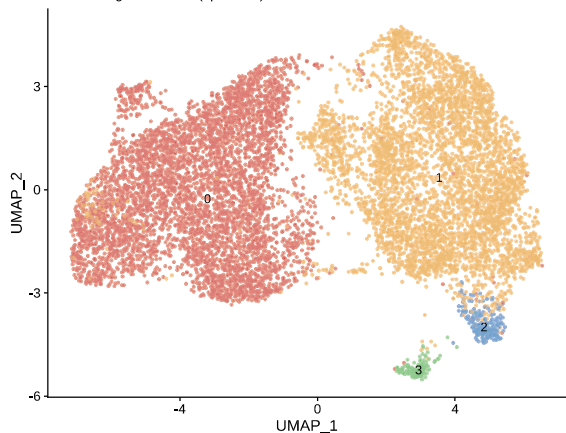

Cluster 3 Genes  
Figure 3 143B method

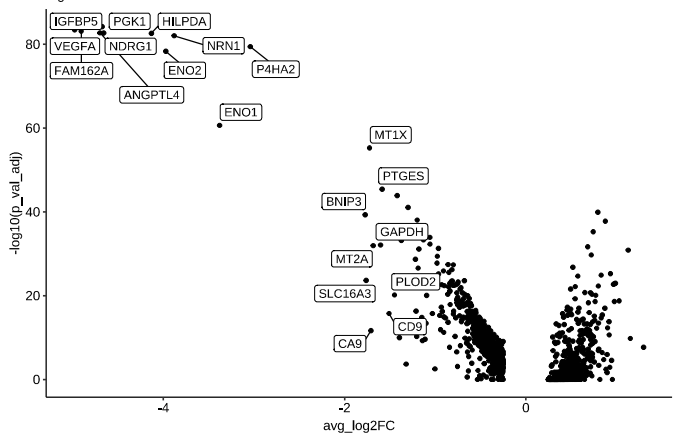

Figure 3 143B Cluster 3  
GO-BP Gene Sets

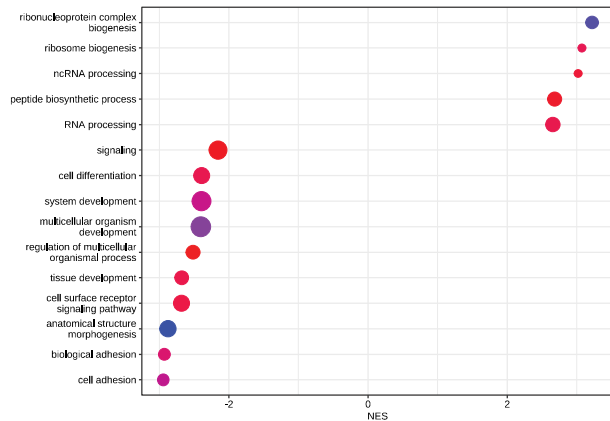

Figure 3 143B Cluster 3  
Hallmark Gene Sets

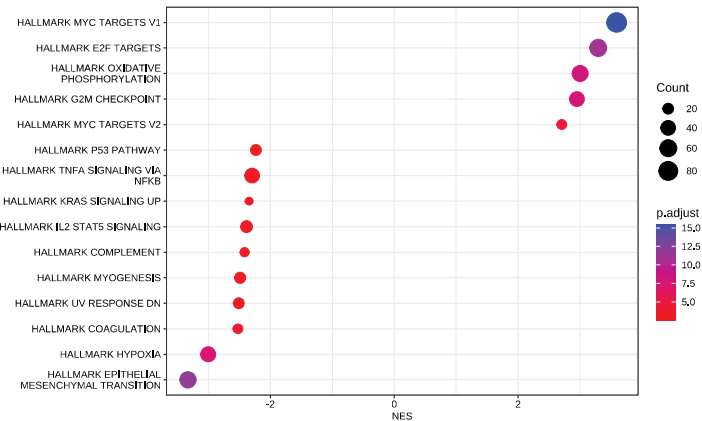

Figure S2 continued

E

Figure 3 NCH-OS-2 by Clusters

Seurat-assigned clusters (optimized)

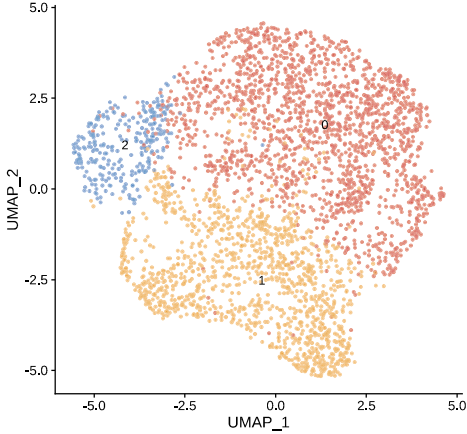

Cluster 0 Genes

Figure 3 NCH-OS-2 method

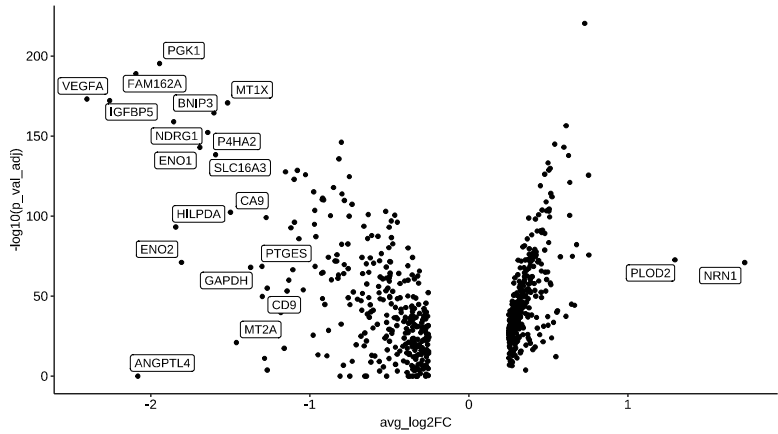

Figure 3 NCH-OS-2 Cluster 0

GO-BP Gene Sets

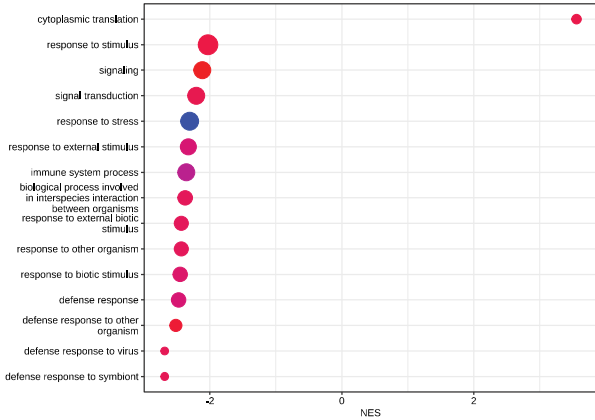

Figure 3 NCH-OS-2 Cluster 0

Hallmark Gene Sets

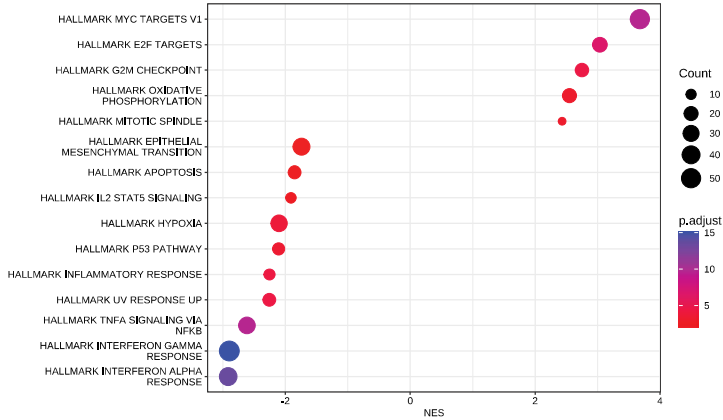

Figure 3 NCH-OS-2 by Clusters

Seurat-assigned clusters (optimized)

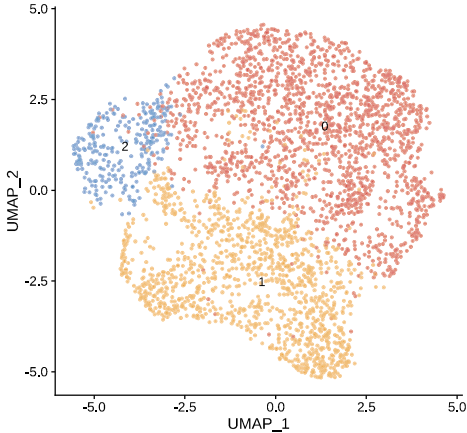

Cluster 1 Genes

Figure 3 NCH-OS-2 method

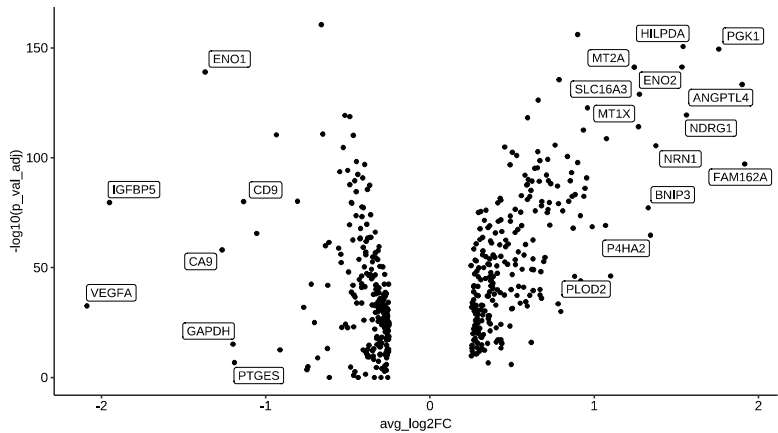

Figure 3 NCH-OS-2 Cluster 1

GO-BP Gene Sets

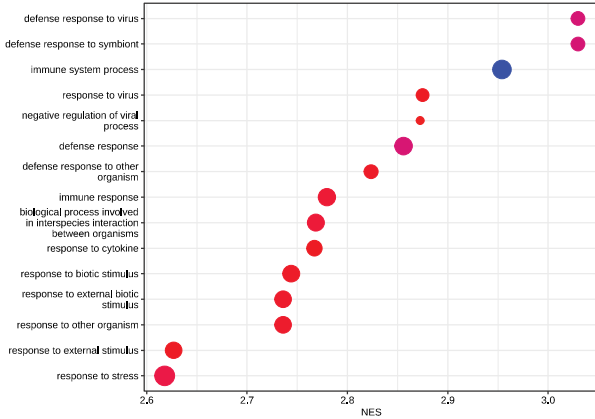

Figure 3 NCH-OS-2 Cluster 1

Hallmark Gene Sets

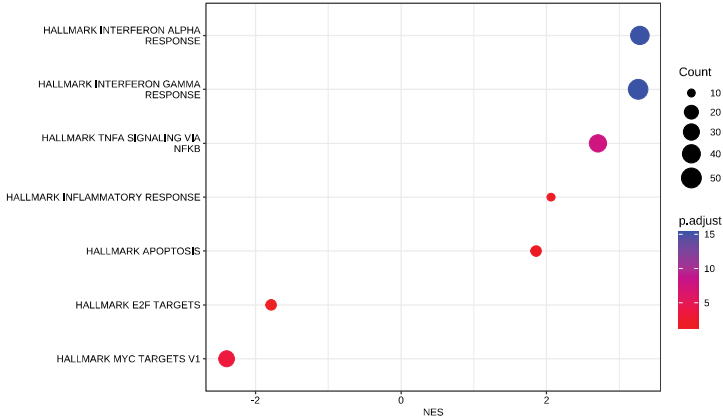

Figure S2 continued

Figure 3 NCH-OS-2 by Clusters  
Seurat-assigned clusters (optimized)

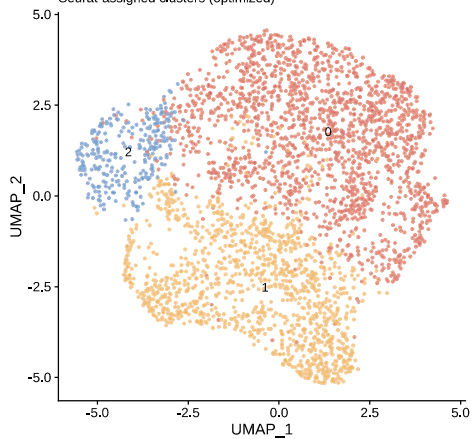

Cluster 2 Genes  
Figure 3 NCH-OS-2 method

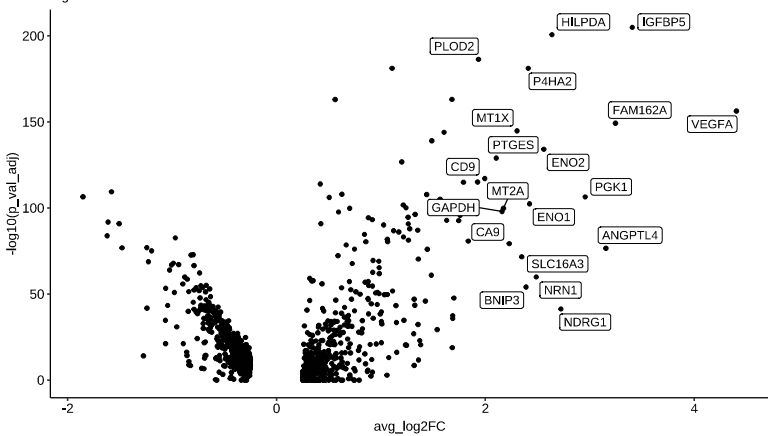

Figure 3 NCH-OS-2 Cluster 2  
GO-BP Gene Sets

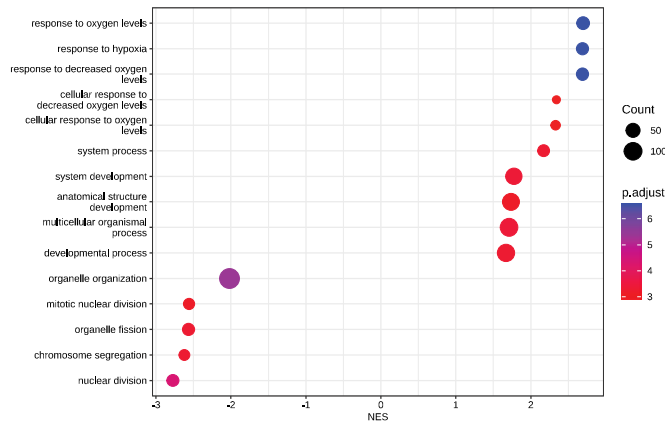

Figure 3 NCH-OS-2 Cluster 2  
Hallmark Gene Sets

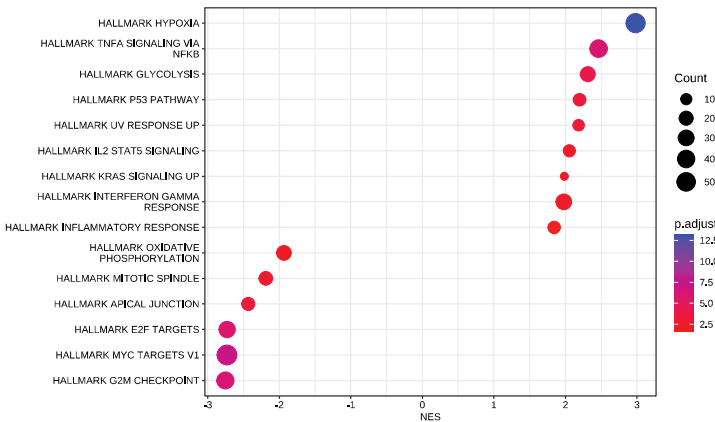

F

Figure 3 NCH-OS-7 by Clusters  
Seurat-assigned clusters (optimized)

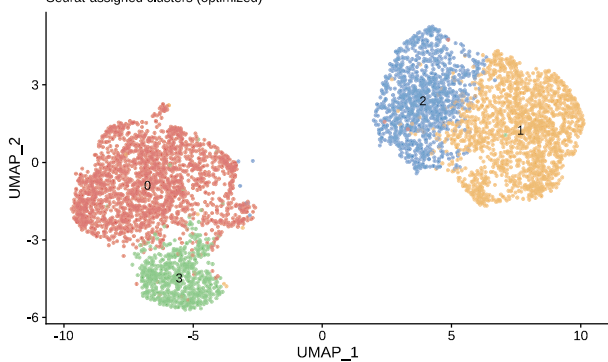

Cluster 0 Genes  
Figure 3 NCH-OS-7 method

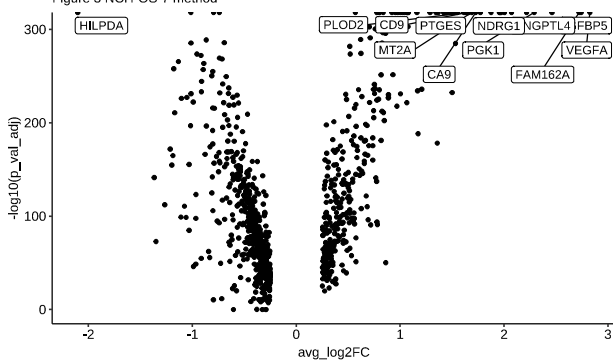

Figure 3 NCH-OS-7 Cluster 0  
GO-BP Gene Sets

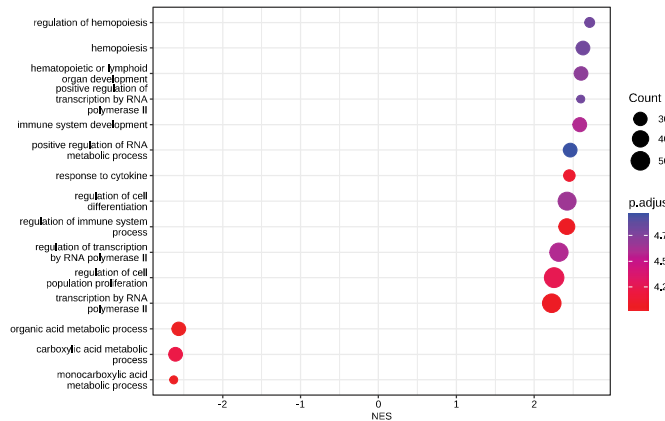

Figure 3 NCH-OS-7 Cluster 0  
Hallmark Gene Sets

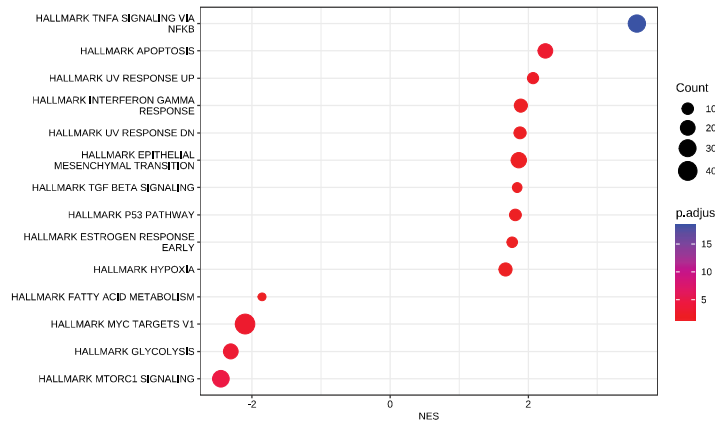

Figure S2 continued

Figure 3 NCH-OS-7 by Clusters  
Seurat-assigned clusters (optimized)

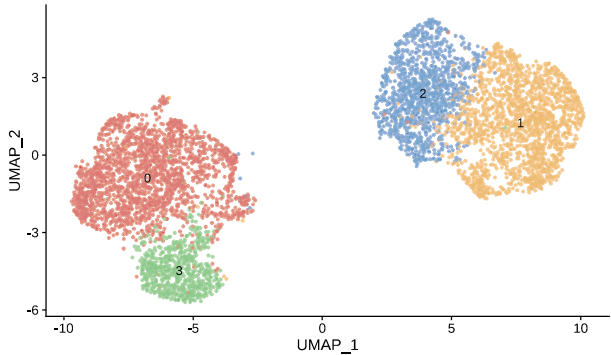

Cluster 1 Genes  
Figure 3 NCH-OS-7 method

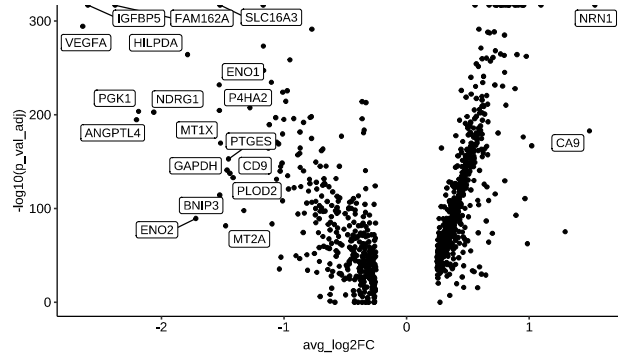

Figure 3 NCH-OS-7 Cluster 1  
GO-BP Gene Sets

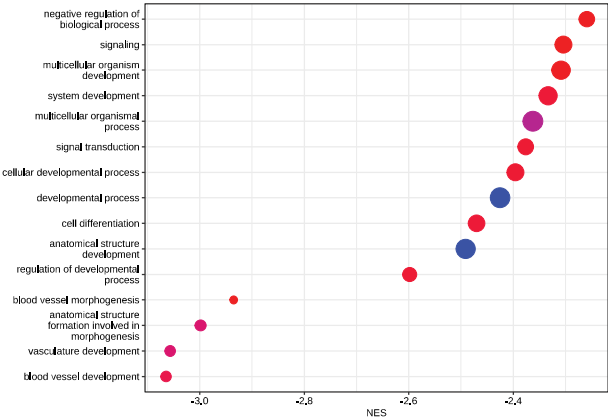

Figure 3 NCH-OS-7 Cluster 1  
Hallmark Gene Sets

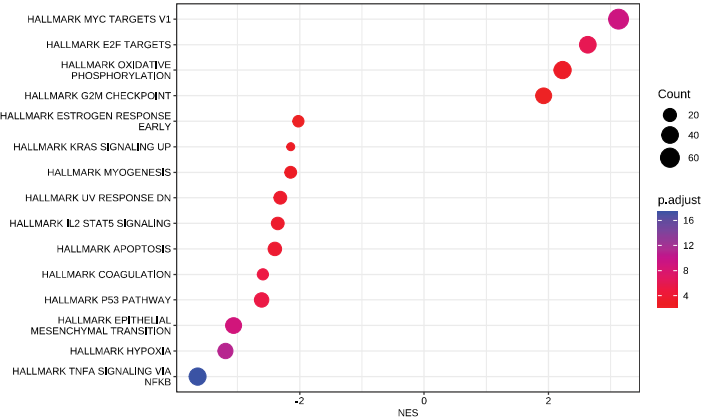

Figure 3 NCH-OS-7 by Clusters  
Seurat-assigned clusters (optimized)

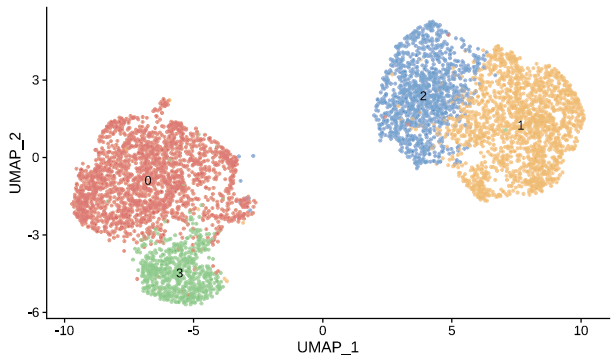

Cluster 2 Genes  
Figure 3 NCH-OS-7 method

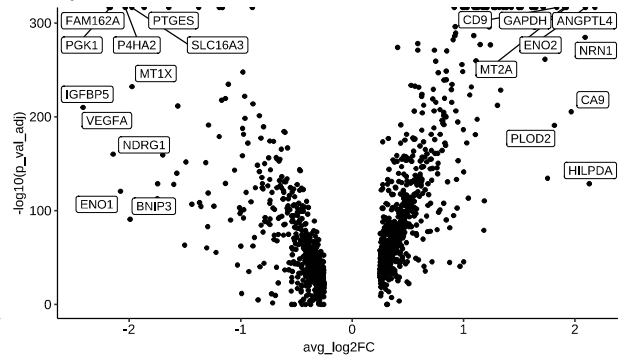

Figure 3 NCH-OS-7 Cluster 2  
GO-BP Gene Sets

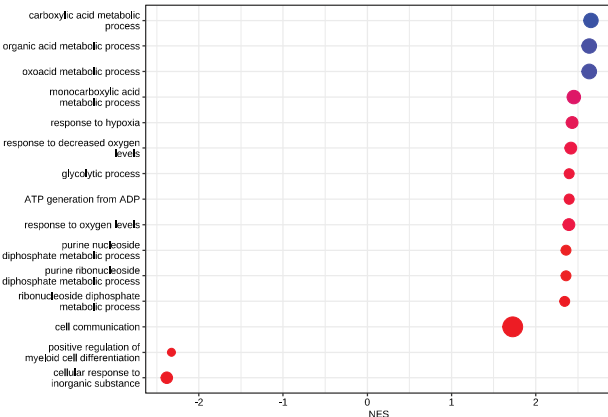

Figure 3 NCH-OS-7 Cluster 2  
Hallmark Gene Sets

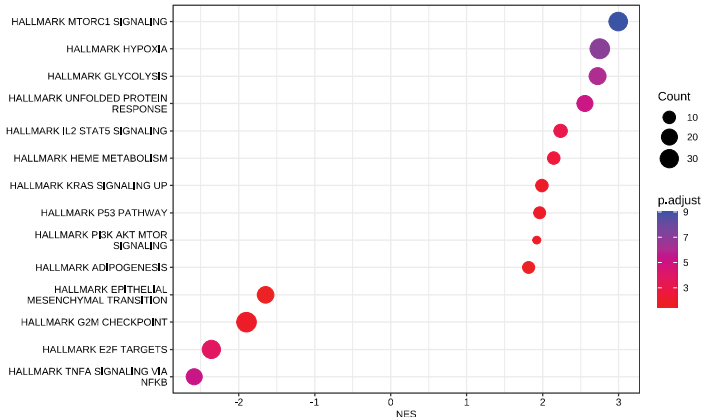

Figure S2 continued

Figure 3 NCH-OS-7 by Clusters  
Seurat-assigned clusters (optimized)

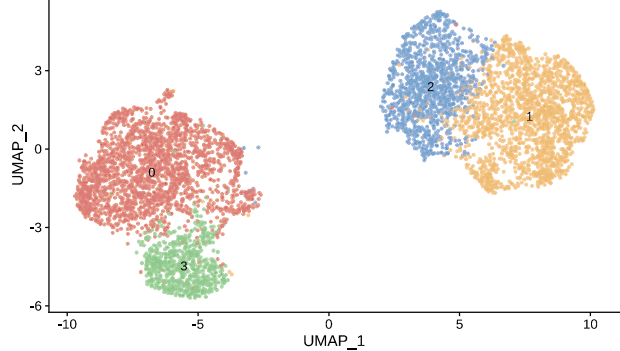

Cluster 3 Genes  
Figure 3 NCH-OS-7 method

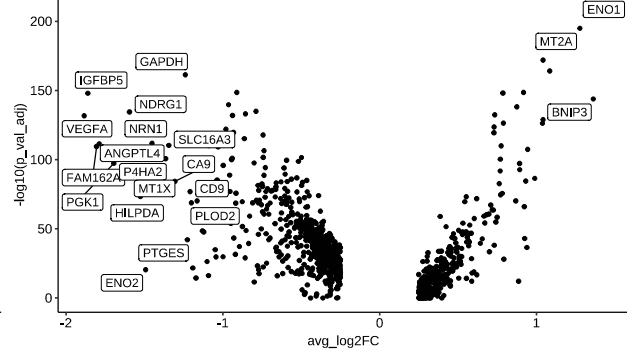

Figure 3 NCH-OS-7 Cluster 3  
GO-BP Gene Sets

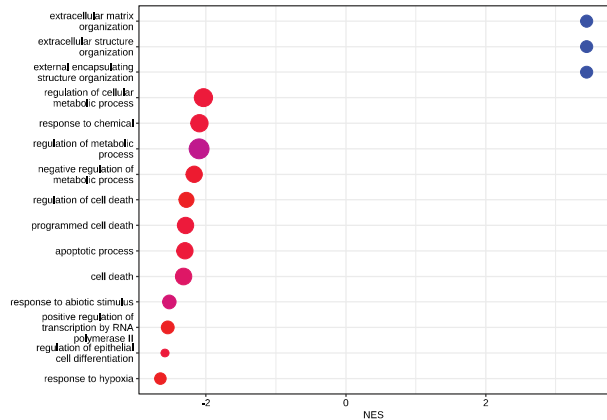

Figure 3 NCH-OS-7 Cluster 3  
Hallmark Gene Sets

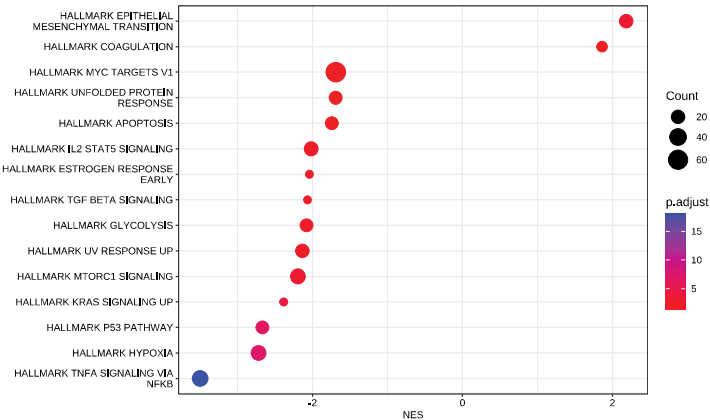

G

Figure 5 OS-17 by Clusters  
Seurat-assigned clusters (optimized)

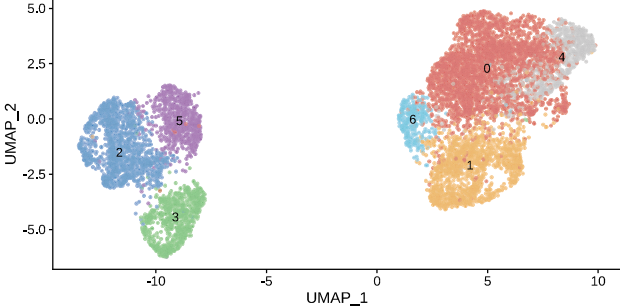

Cluster 0 Genes  
Figure 5 OS-17 method

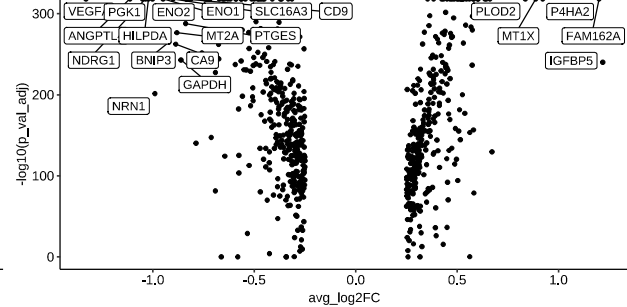

Figure 5 OS-17 Cluster 0  
GO-BP Gene Sets

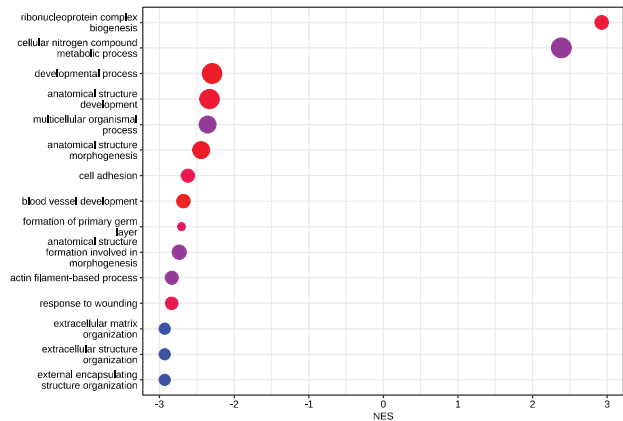

Figure 5 OS-17 Cluster 0  
Hallmark Gene Sets

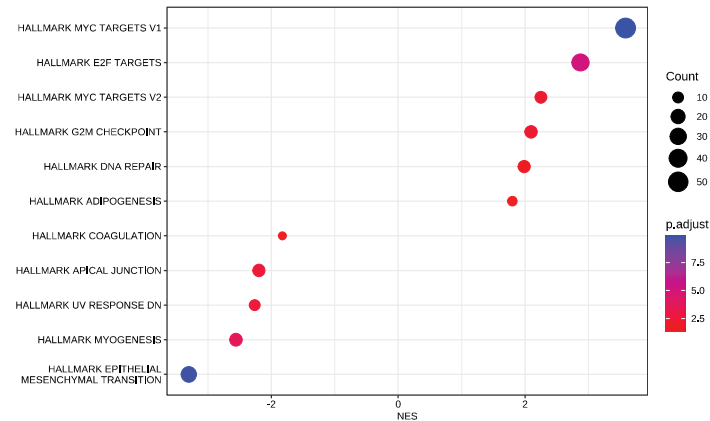

Figure S2 continued

Figure 5 OS-17 by Clusters

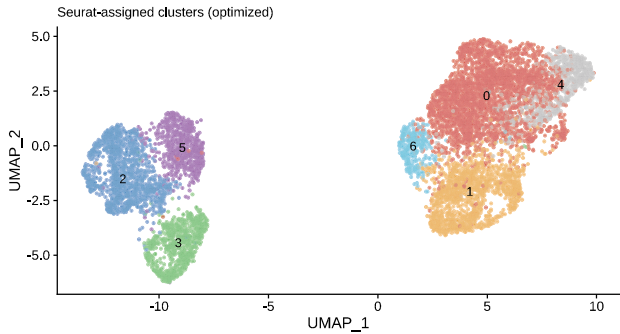

Cluster 1 Genes

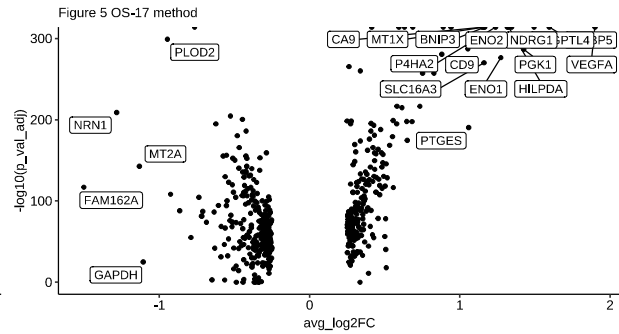

Figure 5 OS-17 Cluster 1

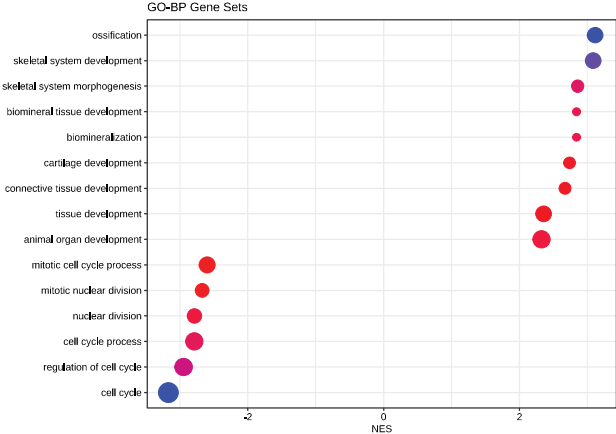

Figure 5 OS-17 Cluster 1

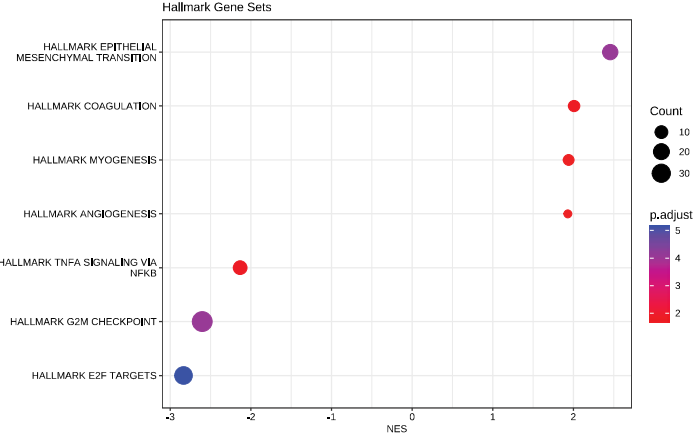

Figure 5 OS-17 by Clusters

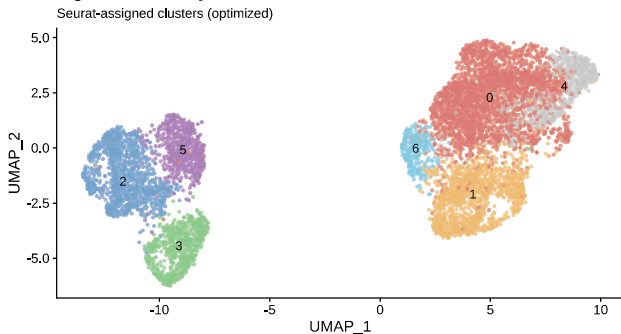

Cluster 2 Genes

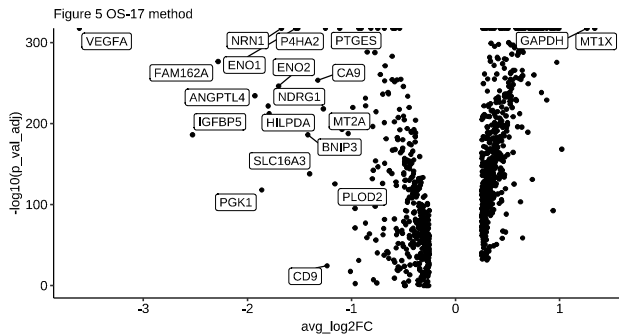

Figure 5 OS-17 Cluster 2

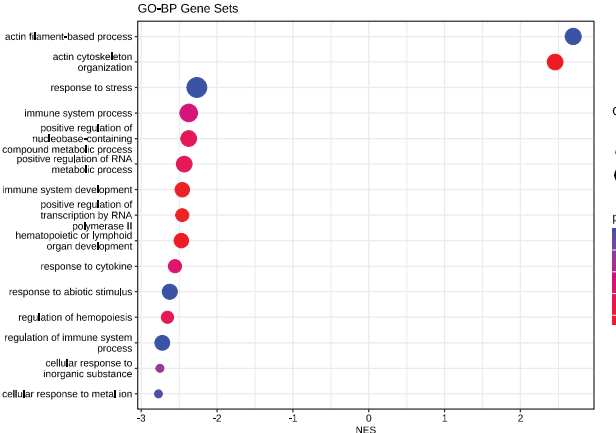

Figure 5 OS-17 Cluster 2

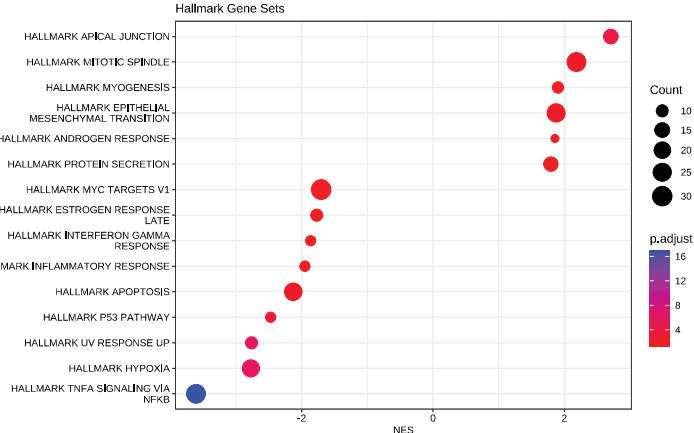

Figure S2 continued

Figure 5 OS-17 by Clusters

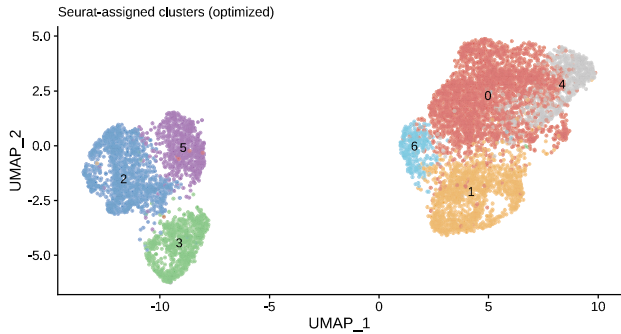

Cluster 3 Genes

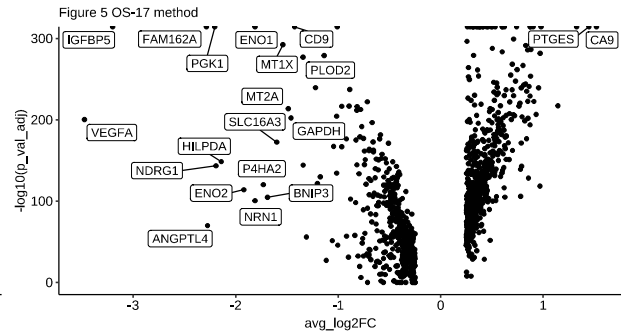

Figure 5 OS-17 Cluster 3

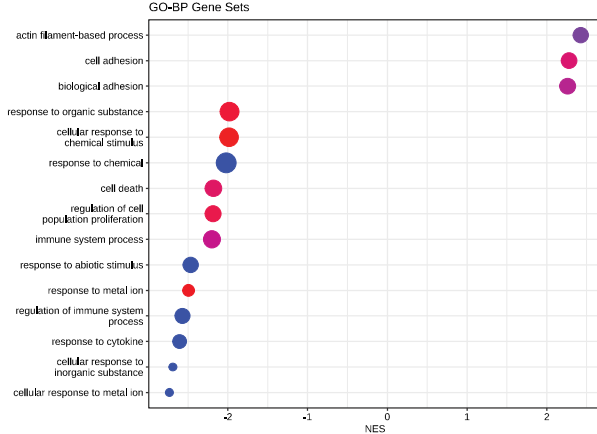

Figure 5 OS-17 Cluster 3

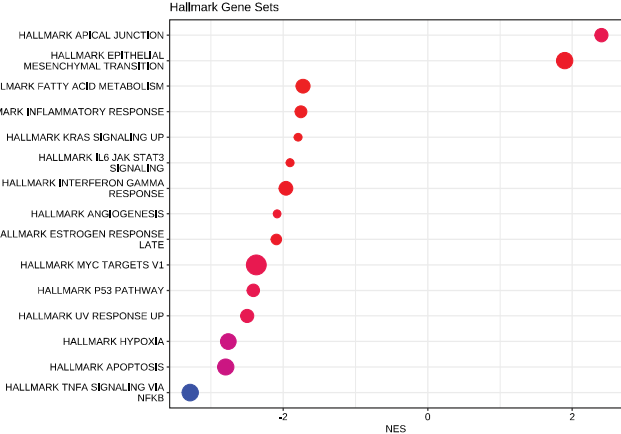

Figure 5 OS-17 by Clusters

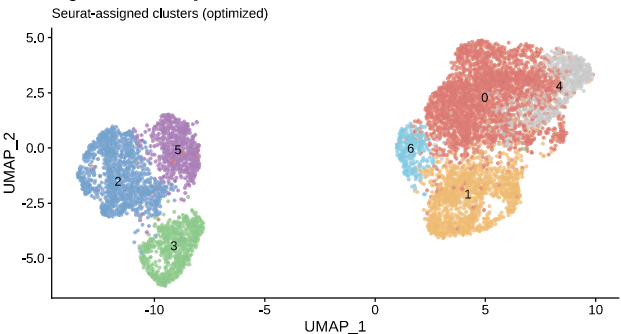

Cluster 4 Genes

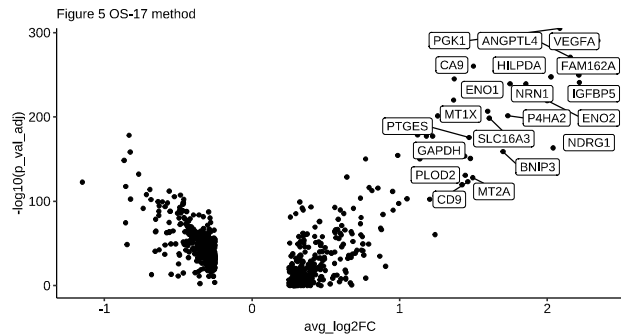

Figure 5 OS-17 Cluster 4

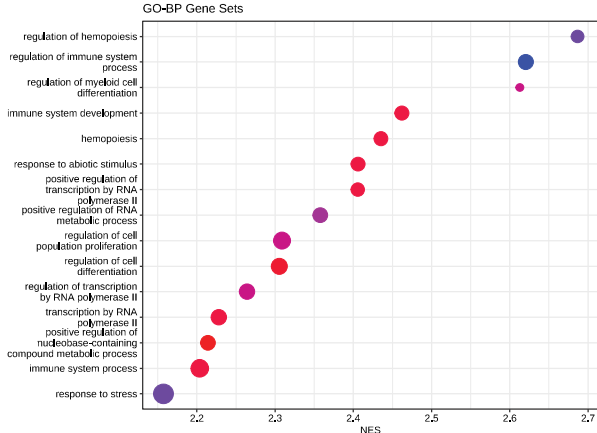

Figure 5 OS-17 Cluster 4

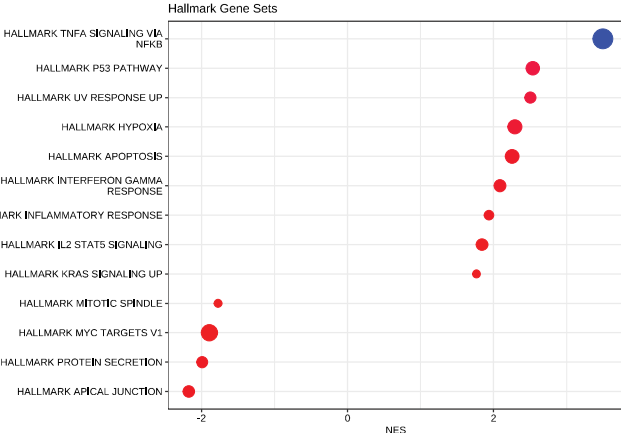

Figure S2 continued

Figure 5 OS-17 by Clusters

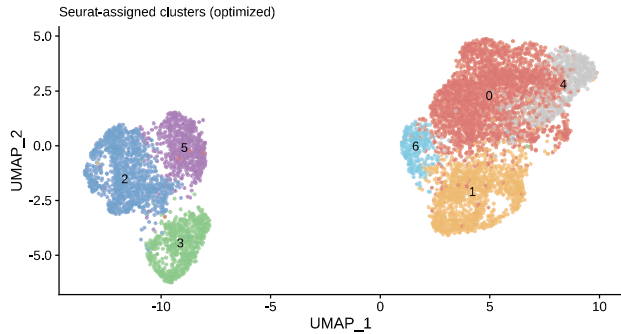

Cluster 5 Genes

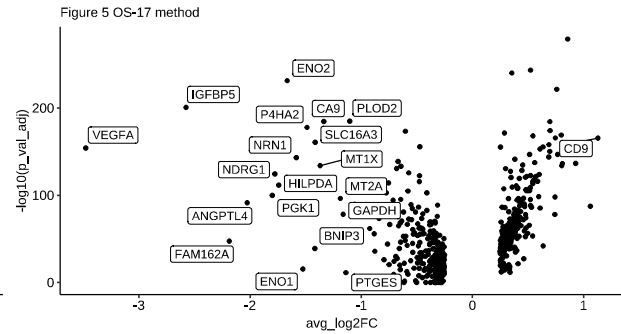

Figure 5 OS-17 Cluster 5

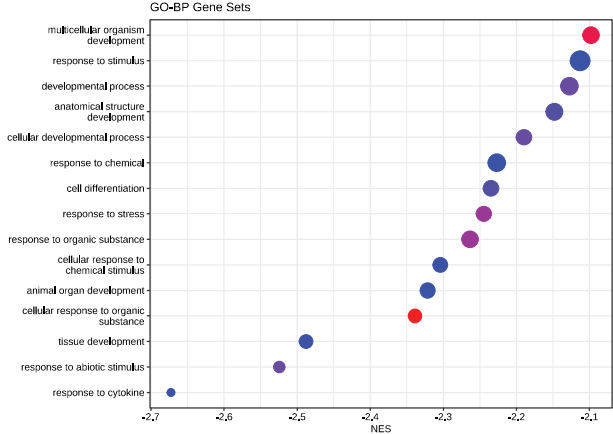

Figure 5 OS-17 Cluster 5

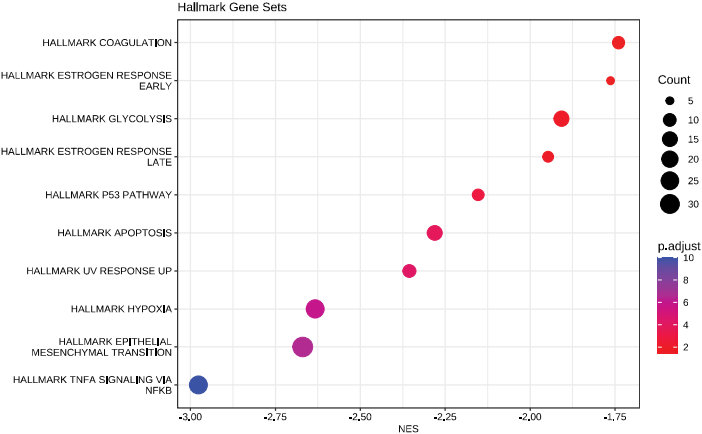

Figure 5 OS-17 by Clusters

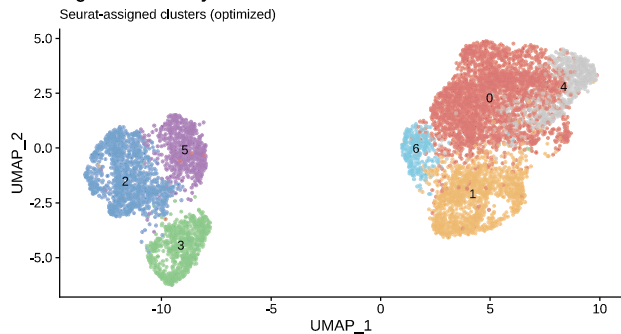

Cluster 6 Genes

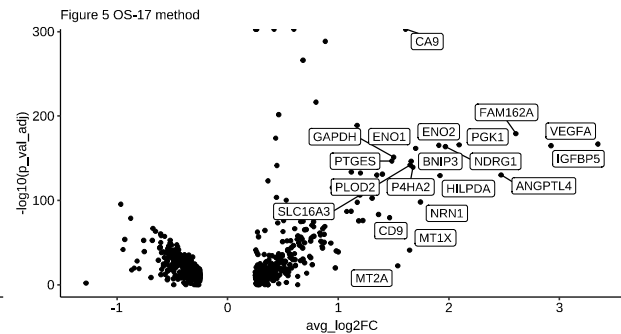

Figure 5 OS-17 Cluster 6

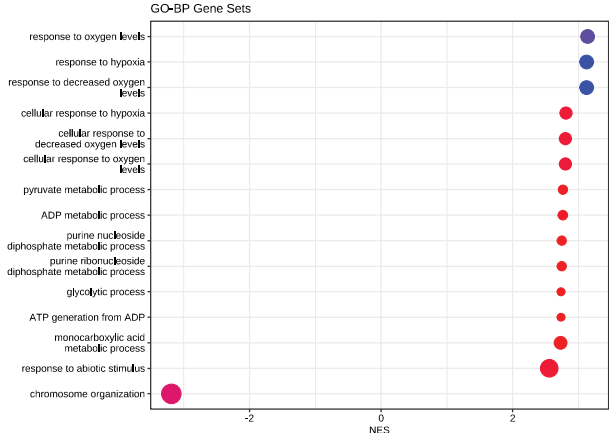

Figure 5 OS-17 Cluster 6

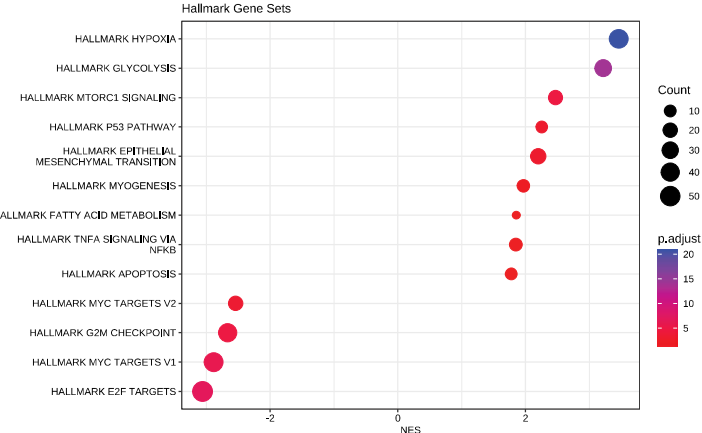

## Figure S2 continued

**Figure S2. In-depth analysis of clusters utilized in analyses.** A) OS-17 cell culture and B) NCH-OS-2 flank cluster analysis (Figure 1). C-F) Merged tibia and lung cluster analysis for OS-17, 143B, NCH-OS-2, and NCH-OS-7, respectively (Figure 3). G) Lineage-tagged OS-17 cell culture, tibia, and lung cluster analysis (Figure 5). The upper left of each analysis displays all clusters for the dataset. The upper right shows a volcano plot analysis, where the top differentially expressed genes for the cluster of interest, compared to all others in the dataset, are shown. DotPlots on the bottom left depict the significantly upregulated GO BioProcesses and GO MolFunction gene lists in the cluster of interest from the differentially expressed gene list for the cluster. Bar plot on the bottom left shows upregulated msigdb Hallmark pathways from the differentially expressed gene list for the cluster. The Wilcoxon rank sum test, or “wilcox” statistical method, was used to generate differentially expressed gene lists.
